# Supplementary material for: Prediction on the origin of chemoselectivity in Lewis base-mediated competition cyclizations between allenoates and chalcones: a computational study
Source: Royal Society of Chemistry journal article supplement (doi:10.1039/c9qo00606k), 2019-01-01
Supplement: c9qo00606k1.pdf [file c9qo00606k1.pdf]

---

## Prediction on the origin of chemoselectivity in Lewis base-mediated competition cyclizations between allenolate and chalcone: A computational study

Qianqian Shi,<sup>a</sup> Wei Wang,<sup>a</sup> Yang Wang,<sup>b</sup> Yu Lan,<sup>a</sup> Changsheng Yao<sup>\*,c</sup>, Donghui Wei<sup>\*,a</sup>

<sup>a</sup> College of Chemistry and Molecular Engineering, and School of Basic Medical Sciences, Zhengzhou University, 100 Science Avenue, Zhengzhou, Henan Province, 450001, P. R. China

<sup>b</sup> Department of Material and Chemical Engineering, Zhengzhou University of Light Industry, 136 Science Avenue, Zhengzhou, Henan Province, 450002, P. R. China

<sup>c</sup> Jiangsu Key Lab of Green Synthetic Chemistry for Functional Materials, School of Chemistry & Materials Science, Jiangsu Normal University, Xuzhou, Jiangsu, 221116, P. R. China

### Table of contents

|                                                                                                                                |   |
|--------------------------------------------------------------------------------------------------------------------------------|---|
| 1. Computational details .....                                                                                                 | 2 |
| 2. The optimized structures of stationary points of the most favorable [ $\alpha$ , $\beta$ ]-[4 + 2] annulation pathway ..... | 3 |
| 3. The discussion for the chirality of $\alpha$ -C and C3 atoms and the choice of <b>TS2</b> .....                             | 4 |
| 4. The discussion of $Cs_2CO_3$ -assisted [1, 3]-proton transfer from $\alpha$ -C to $\gamma$ -C atom .....                    | 5 |
| 5. Tests of the different computational methods .....                                                                          | 6 |
| 6. The <i>p</i> -orbital of the center atoms in the $LUMO_{TSs}$ (Only shown the orbital picture of the key atoms) .....       | 7 |
| 7. Cartesian coordinates of stationary points .....                                                                            | 8 |

---

\* Corresponding Authors: donghuiwei@zzu.edu.cn (D. H. Wei), csyao@jsnu.edu.cn (C. S. Yao).

---

## 1. Computational details

All theoretical calculations on the possible mechanisms of LBs catalyzed annulation reactions of allenolate with chalcone were performed using Gaussian 09 suite of programs. All structures of the stationary points were optimized by the M06-2X/6-31G(d, p)/def2-TZVP method in solvent using integral equation formalism polarizable continuum model (IEF-PCM) at 298.15 K. The solvent is acetonitrile for NHC/PMe<sub>3</sub> catalysis system and the solvent is toluene for DABCO catalysis system. Moreover, basis sets 6-31G(d, p) and 6-311++G(2d, 2p) were employed for H, C, N, O and P atoms, while basis sets def2-TZVP and def2-QZVP were used for Cs atom. The corresponding vibrational frequencies were calculated at the same level (M06-2X/6-31G(d, p)/def2-TZVP//IEFPCM) to take account of the free energy contributions. The single-point energies of the optimized structures were then refined at the higher basis set 6-311++G(2d, 2p)/def2-QZVP with the M06-2X method and the same solvent effect included and simulated by using IEF-PCM. We confirmed that all the reactants, intermediates, and products have no imaginary frequencies, whereas each transition state has only one imaginary frequency. In addition, we have also made some tests of the different computational methods (such as B3LYP, B3PW91, and  $\omega$ B97X-D).

## 2. The optimized structures of stationary points of the most favorable $[\alpha, \beta]$ -[4 + 2] annulation pathway

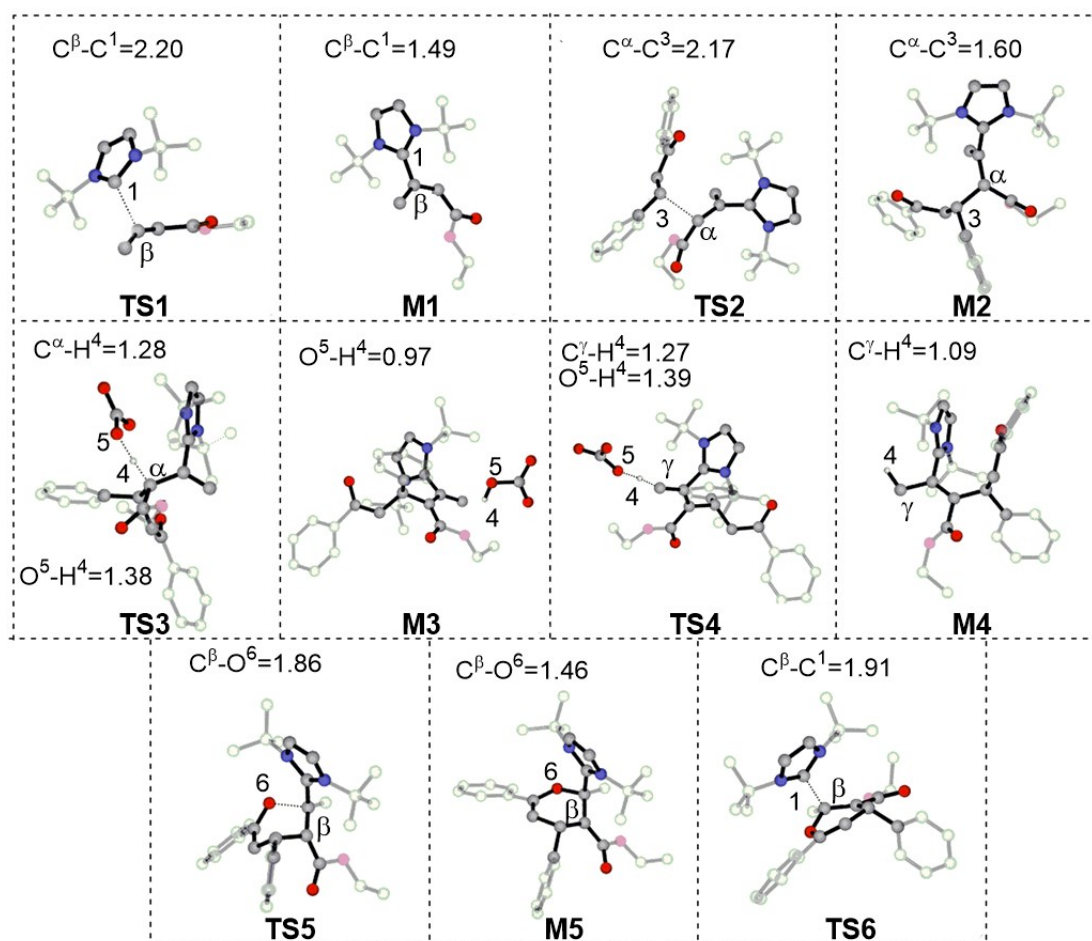

Fig. S1 Optimized structures and geometrical parameters of the stationary points (distance in Å)

### 3. The discussion for the chirality of $\alpha$ -C and C3 atoms and the choice of TS2

As presented in **Fig. S2**, the chiral centers ( $\alpha$ -C and C3 atoms) are formed in this step, we have also considered the chirality of  $\alpha$ -C atom, which has had not exist after the next step. Considering with the different isomers associated with the two chiral centers, we must point out that we have actually studied four possible reaction pathways, and the transition states **TS2(RR)** and **TS2(SS)** are with the lower energy barriers. Because the catalyst NHC has no chiral center, thus **TS2(RR)** and **TS2(SS)** are the image of each other (It is the same situation for **TS2(SR)** and **TS2(RS)**), which means they have the same energy in the following steps. **TS2(RR)** leads to the formation of product with *R*-configuration, and **TS2(SS)** leads to the formation of product with *S*-configuration. Therefore, we chose **TS2(RR)** as transition state **TS2** in the main text to discuss.

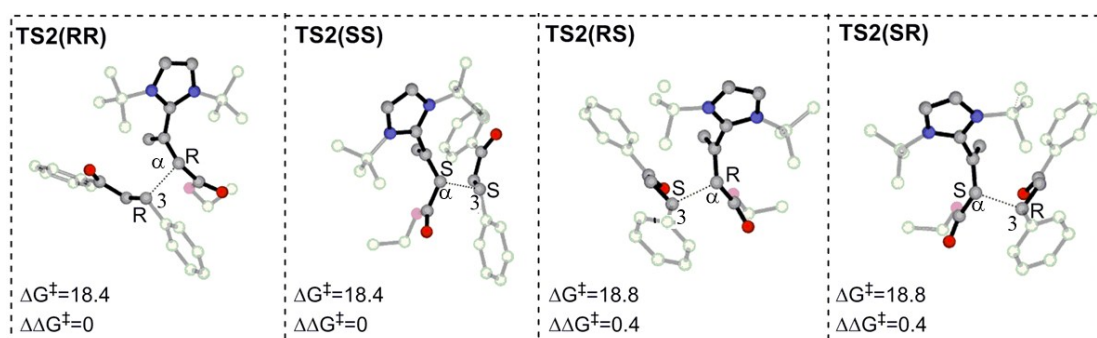

**Fig. S2** Possible reaction patterns for the  $C^\alpha$ -C3 bond formation step and energy barriers (unit: kcal/mol)

#### 4. The discussion of $\text{Cs}_2\text{CO}_3$ -assisted [1, 3]-proton transfer from $\alpha$ -C to $\gamma$ -C atom

We have also studied the possibility of  $\text{Cs}_2\text{CO}_3$ -assisted [1, 3]-proton transfer. As shown in **Fig. S3**, the energy barrier is 27.7 kcal/mol and is higher than the energy barrier of  $\text{CO}_3^{2-}$ -assisted [1, 3]-proton transfer. Therefore, the [1, 3]-proton transfer from  $\alpha$ -C to  $\gamma$ -C atom in the most favorable  $[\alpha, \beta]$ -[4 + 2] annulation pathway is mainly assisted by  $\text{HCO}_3^-$  anion.

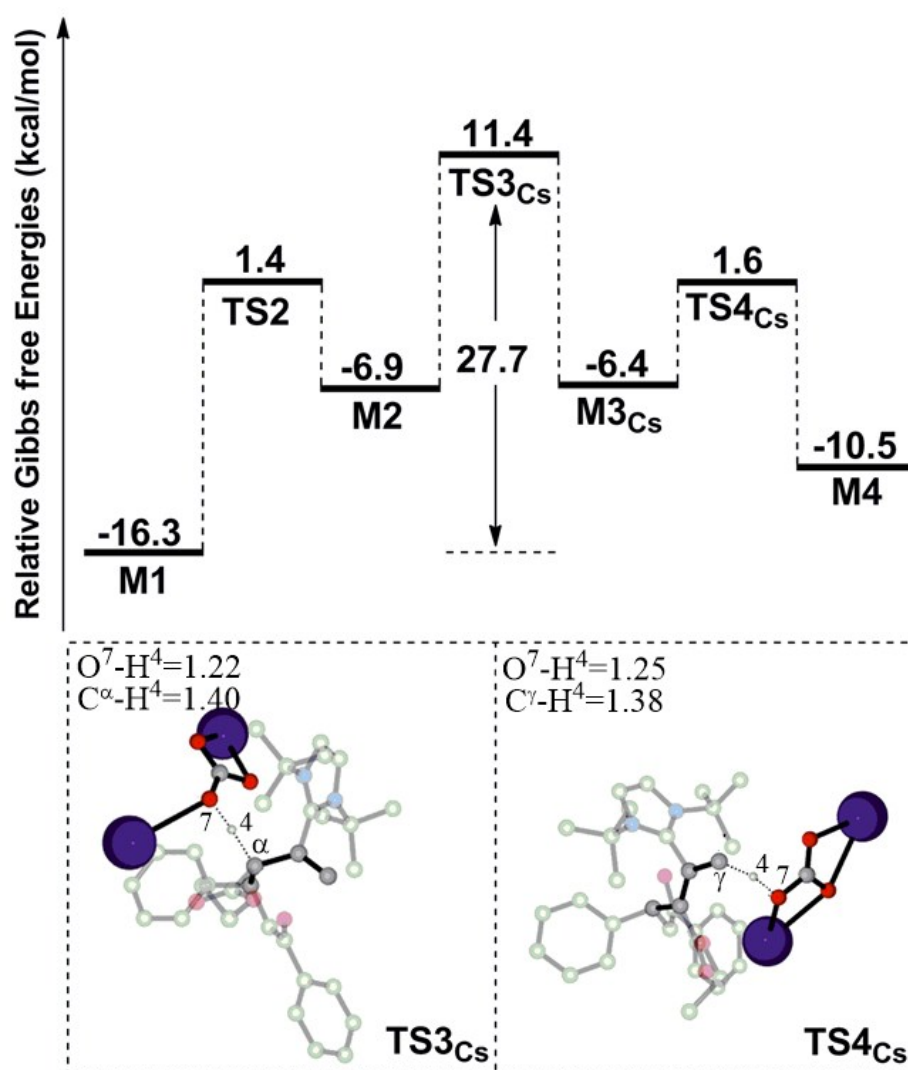

**Fig. S3** The relative Gibbs free energy profiles of  $\text{Cs}_2\text{CO}_3$ -assisted [1, 3]-proton transfer from  $\alpha$ -C to  $\gamma$ -C atom and the optimized structures of transition states (distance in Å)

---

## 5. Tests of the different computational methods

We have employed at the B3LYP-D3/6-311++G(2d, 2p)//IEF-PCM<sub>acetonitrile</sub> & B3LYP-D3/6-31G(d, p)//IEF-PCM<sub>acetonitrile</sub>, B3PW91-D3/6-311++G(2d, 2p)//IEF-PCM<sub>acetonitrile</sub> & B3PW91-D3/6-31G(d, p)//IEF-PCM<sub>acetonitrile</sub>, and  $\omega$ B97X-D/6-311++G(2d, 2p)//IEF-PCM<sub>acetonitrile</sub> &  $\omega$ B97X-D/6-31G(d, p)//IEF-PCM<sub>acetonitrile</sub> methods to re-calculate the first and second steps of the most favorable  $[\alpha, \beta]$ -[4 + 2] annulation pathway and the correction of single-point energies of the optimized structures with high basis set. As summarized in **Table S1**, the computed results by using different methods including M06-2X, B3PW91-D3, B3LYP-D3, and  $\omega$ B97X-D have the same trend and small differences with those discussed above, indicating that the selected method M06-2X functional and basis sets should be suitable and reliable for studying the NHC catalyzed  $[\alpha, \beta]$ -[4 + 2] annulation reaction.

**Table S1** The energy barriers associated with stereoselectivity-determining step by using different methods (unit: kcal/mol)

|                                     | <b>M06-2X</b> | <b>B3LYP-D3</b> | <b>B3PW91-D3</b> | <b><math>\omega</math>B97X-D</b> |
|-------------------------------------|---------------|-----------------|------------------|----------------------------------|
| $\Delta G^\ddagger_{\text{step 1}}$ | 16.2          | 15.4            | 15.2             | 17.2                             |
| $\Delta G^\ddagger_{\text{step 2}}$ | 17.7          | 17.1            | 17.0             | 18.9                             |

6. The  $p$ -orbital of the center atoms in the  $LUMO_{TSs}$  (Only shown the orbital picture of the key atoms)

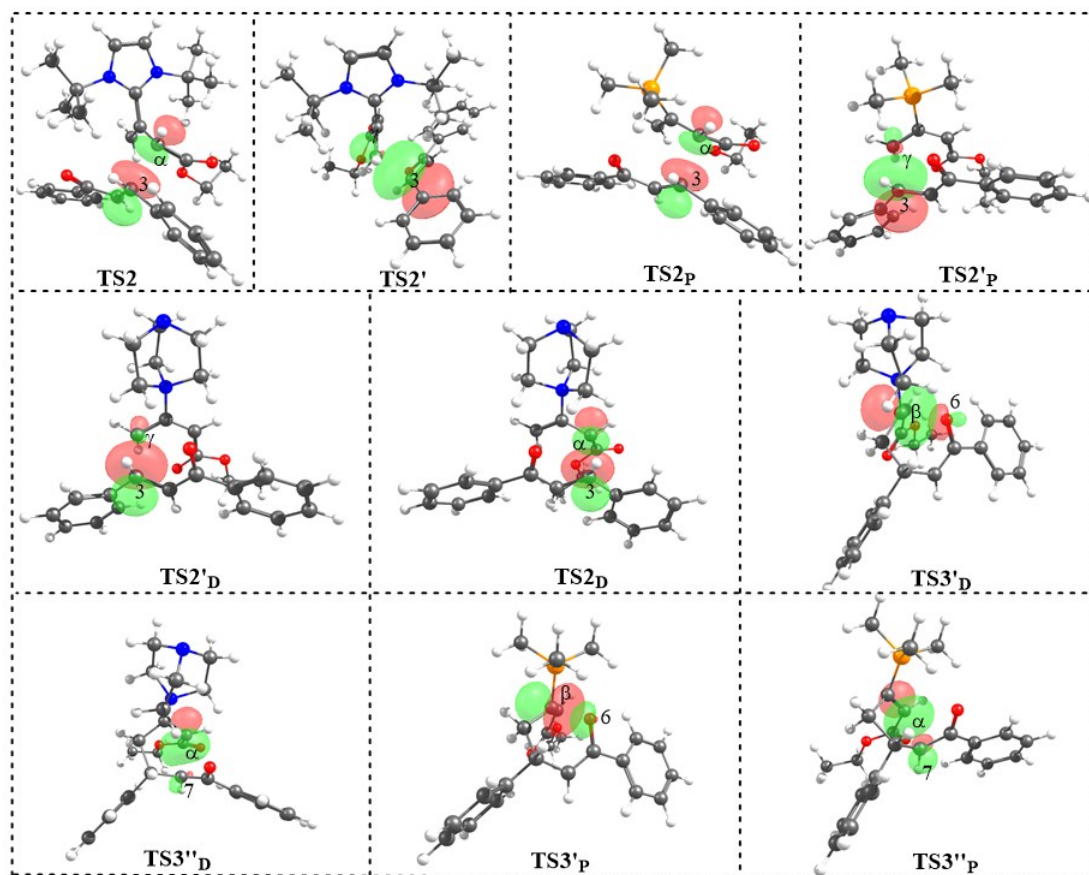

Fig. S4 The  $p$ -orbital of the center atoms in the  $LUMO_{TSs}$  (Only shown the orbital picture of the key atoms)

---

## 7. Cartesian coordinates of stationary points

### NHC

|   |             |             |             |
|---|-------------|-------------|-------------|
| C | -0.67718100 | 1.61520400  | 0.00386600  |
| C | 0.67718100  | 1.61520400  | -0.00386300 |
| C | 0.00000000  | -0.57012600 | 0.00000500  |
| N | -1.06374900 | 0.28333100  | 0.00771000  |
| H | -1.36587800 | 2.44333000  | 0.00785400  |
| H | 1.36587800  | 2.44333000  | -0.00785200 |
| N | 1.06374900  | 0.28333100  | -0.00770100 |
| C | -2.46012900 | -0.22007500 | -0.00034700 |
| C | -3.44082100 | 0.94886700  | 0.05941600  |
| C | -2.67479200 | -1.01489600 | -1.29056000 |
| C | -2.65289000 | -1.12223300 | 1.22068900  |
| H | -3.30232100 | 1.54187000  | 0.96819400  |
| H | -3.34050500 | 1.60312600  | -0.81145800 |
| H | -4.45883900 | 0.55218300  | 0.06643400  |
| H | -1.95366900 | -1.83279200 | -1.34571100 |
| H | -3.68809400 | -1.42580700 | -1.31574600 |
| H | -2.53764600 | -0.36873600 | -2.16277800 |
| H | -3.66614700 | -1.53384500 | 1.22575900  |
| H | -1.93174700 | -1.94108100 | 1.19526800  |
| H | -2.50220400 | -0.55238800 | 2.14243900  |
| C | 2.46012900  | -0.22007500 | 0.00034700  |
| C | 2.67478900  | -1.01493200 | 1.29053800  |
| C | 2.65289400  | -1.12219900 | -1.22071400 |
| C | 3.44082100  | 0.94886800  | -0.05938100 |
| H | 2.53764400  | -0.36879500 | 2.16277300  |
| H | 1.95366300  | -1.83282700 | 1.34566700  |
| H | 3.68809000  | -1.42584600 | 1.31571400  |
| H | 2.50220800  | -0.55232800 | -2.14244800 |
| H | 3.66615000  | -1.53381000 | -1.22579500 |
| H | 1.93175000  | -1.94104800 | -1.19531800 |
| H | 4.45884000  | 0.55218500  | -0.06639500 |
| H | 3.30233200  | 1.54189100  | -0.96814800 |
| H | 3.34049400  | 1.60310800  | 0.81150600  |

### R1

|   |             |             |             |
|---|-------------|-------------|-------------|
| C | 2.49988700  | -0.40477500 | -0.00001500 |
| C | 3.73798400  | -0.00756600 | -0.00025400 |
| C | 1.24909200  | -0.80231200 | 0.00019700  |
| H | 4.26772700  | 0.16360000  | -0.93261400 |
| H | 4.26801600  | 0.16408700  | 0.93184300  |
| H | 0.98918800  | -1.85598200 | 0.00044000  |
| C | 0.14496500  | 0.18924400  | 0.00013000  |
| O | 0.27494700  | 1.39366200  | -0.00005400 |
| O | -1.04236700 | -0.42967200 | 0.00033300  |
| C | -2.19512100 | 0.43144400  | 0.00021300  |



---

|   |             |             |             |
|---|-------------|-------------|-------------|
| C | -3.41891600 | -0.45669900 | -0.00043300 |
| H | -2.15289900 | 1.07346700  | -0.88403600 |
| H | -2.15348100 | 1.07292200  | 0.88488900  |
| H | -4.32046300 | 0.15954500  | -0.00051100 |
| H | -3.43276400 | -1.09251200 | -0.88835800 |
| H | -3.43330600 | -1.09306600 | 0.88708700  |

**R2**

|   |             |             |             |
|---|-------------|-------------|-------------|
| C | -1.18083400 | -0.96599700 | 0.03818900  |
| O | -1.17640700 | -2.18851100 | 0.09723300  |
| C | -2.48267500 | -0.22444400 | 0.01951200  |
| C | -2.58393600 | 1.13865200  | 0.31536200  |
| C | -3.64064200 | -0.94961000 | -0.28386700 |
| C | -3.82714600 | 1.76557700  | 0.30373400  |
| H | -1.70457600 | 1.71524900  | 0.58122000  |
| C | -4.87833900 | -0.32070600 | -0.30856400 |
| H | -3.54587000 | -2.00807900 | -0.50198000 |
| C | -4.97275600 | 1.04002400  | -0.01417200 |
| H | -3.90006200 | 2.82102900  | 0.54390900  |
| H | -5.77020000 | -0.88681600 | -0.55608200 |
| H | -5.93939900 | 1.53331400  | -0.03043400 |
| C | 0.08225500  | -0.19176400 | -0.03717300 |
| C | 1.25788400  | -0.82625500 | 0.09157300  |
| H | 0.02852600  | 0.87474500  | -0.22192300 |
| H | 1.21795500  | -1.90147000 | 0.26312900  |
| C | 2.59714100  | -0.23445000 | 0.02447000  |
| C | 3.70844600  | -1.07542600 | 0.17084600  |
| C | 2.81273600  | 1.13684600  | -0.18340600 |
| C | 5.00170500  | -0.56570800 | 0.11027600  |
| H | 3.55008900  | -2.13814600 | 0.33220300  |
| C | 4.10298100  | 1.64556300  | -0.24340400 |
| H | 1.96972200  | 1.81098300  | -0.29692500 |
| C | 5.20146600  | 0.79647800  | -0.09758000 |
| H | 5.85092100  | -1.23134600 | 0.22424700  |
| H | 4.25611000  | 2.70764900  | -0.40420600 |
| H | 6.20831800  | 1.19830000  | -0.14578700 |

**CO<sub>3</sub><sup>2-</sup>**

|   |            |             |             |
|---|------------|-------------|-------------|
| C | 0.00000000 | 0.00000000  | -0.00123900 |
| O | 0.00000000 | 0.00000000  | 1.29619100  |
| O | 0.00000000 | 1.12341700  | -0.64763100 |
| O | 0.00000000 | -1.12341700 | -0.64763100 |

**TS1**

|   |            |            |             |
|---|------------|------------|-------------|
| C | 1.07715400 | 1.82150100 | 1.34265600  |
| C | 2.21598400 | 1.09341300 | 1.38073400  |
| C | 1.05685800 | 0.44822500 | -0.46460300 |
| N | 0.39375100 | 1.43134000 | 0.20333000  |
| H | 0.72567000 | 2.58970800 | 2.01279500  |

---

|           |             |             |             |
|-----------|-------------|-------------|-------------|
| H         | 3.02388500  | 1.11840300  | 2.09235100  |
| N         | 2.20177400  | 0.27905300  | 0.25943600  |
| C         | -0.85612800 | 2.10935100  | -0.22616100 |
| C         | -0.54056900 | 3.59681200  | -0.42459000 |
| C         | -1.35396200 | 1.52163200  | -1.54250900 |
| C         | -1.91605500 | 1.93033100  | 0.86524300  |
| H         | -0.18571700 | 4.06276400  | 0.49861500  |
| H         | 0.22540100  | 3.72293400  | -1.19499500 |
| H         | -1.44493900 | 4.12290200  | -0.74185500 |
| H         | -1.67109600 | 0.48518700  | -1.42186200 |
| H         | -2.21076500 | 2.11519900  | -1.87526500 |
| H         | -0.57553200 | 1.56764800  | -2.30837900 |
| H         | -2.85615400 | 2.38636600  | 0.54049800  |
| H         | -2.09119200 | 0.86899400  | 1.05453900  |
| H         | -1.61545100 | 2.40897800  | 1.80167800  |
| C         | 3.31078400  | -0.64318700 | -0.10886500 |
| C         | 3.03290500  | -2.04358600 | 0.44466500  |
| C         | 3.43493600  | -0.68119700 | -1.63210900 |
| C         | 4.61919400  | -0.11192900 | 0.48422800  |
| H         | 2.85268400  | -2.00085600 | 1.52338600  |
| H         | 2.16728800  | -2.49355500 | -0.04611300 |
| H         | 3.90035000  | -2.68565300 | 0.26587600  |
| H         | 3.61640900  | 0.32251900  | -2.02663700 |
| H         | 4.27825300  | -1.32182600 | -1.90424500 |
| H         | 2.52947000  | -1.08140900 | -2.08803200 |
| H         | 5.44643800  | -0.71017600 | 0.09524500  |
| H         | 4.78502100  | 0.93167200  | 0.20194900  |
| H         | 4.64060000  | -0.19444600 | 1.57402800  |
| C         | -0.03517800 | -1.43890900 | -0.79863700 |
| C         | 0.02376200  | -1.65189400 | -2.09580300 |
| C         | -0.44134200 | -1.80024900 | 0.43901800  |
| H         | -0.30420500 | -2.61552800 | -2.47751500 |
| H         | 0.37308900  | -0.89893200 | -2.78946300 |
| H         | 0.27407200  | -2.08558000 | 1.20307100  |
| C         | -1.81300300 | -1.67678800 | 0.89252400  |
| O         | -2.19535000 | -1.92644900 | 2.02584100  |
| O         | -2.67072800 | -1.25759600 | -0.07045400 |
| C         | -4.02894500 | -1.06993000 | 0.34104300  |
| C         | -4.75263800 | -0.39448700 | -0.80329500 |
| H         | -4.05032900 | -0.45897800 | 1.24882500  |
| H         | -4.46837400 | -2.04259100 | 0.58518900  |
| H         | -5.80194600 | -0.23908500 | -0.54240400 |
| H         | -4.29959400 | 0.57722900  | -1.01807700 |
| H         | -4.70591900 | -1.00693600 | -1.70689800 |
| <b>M1</b> |             |             |             |
| C         | -2.90107300 | 1.31386800  | -0.08671000 |
| C         | -3.25774000 | 0.01234600  | -0.14515000 |

---

|   |             |             |             |
|---|-------------|-------------|-------------|
| C | -1.05950100 | 0.09996700  | 0.13423100  |
| N | -1.53336600 | 1.36498400  | 0.09190500  |
| H | -3.51727500 | 2.19183900  | -0.15309900 |
| H | -4.23264300 | -0.42199500 | -0.27069300 |
| N | -2.10755900 | -0.73994000 | -0.01467400 |
| C | -0.77543100 | 2.67337900  | 0.09490700  |
| C | -1.72055100 | 3.76430200  | 0.61153200  |
| C | 0.44668800  | 2.62145400  | 1.01350300  |
| C | -0.36235800 | 2.97808000  | -1.34597700 |
| H | -2.52653800 | 3.98769400  | -0.09055600 |
| H | -2.14699700 | 3.49604400  | 1.58208900  |
| H | -1.13998500 | 4.68055300  | 0.73369700  |
| H | 1.22571900  | 1.97107500  | 0.61927700  |
| H | 0.84172500  | 3.63820400  | 1.08140800  |
| H | 0.17207500  | 2.28657400  | 2.01652900  |
| H | 0.11223500  | 3.96271500  | -1.37893000 |
| H | 0.34876000  | 2.23033500  | -1.70233100 |
| H | -1.23642200 | 2.99333300  | -2.00347300 |
| C | -2.11325300 | -2.25040500 | 0.01067400  |
| C | -0.96573300 | -2.80546800 | -0.83388100 |
| C | -2.01515400 | -2.71520700 | 1.46428700  |
| C | -3.43632900 | -2.73297300 | -0.59142200 |
| H | -0.99155100 | -2.38804000 | -1.84409300 |
| H | 0.00648600  | -2.59877600 | -0.39093300 |
| H | -1.09587800 | -3.88843100 | -0.90275400 |
| H | -2.81432300 | -2.26965200 | 2.06359500  |
| H | -2.12344700 | -3.80274500 | 1.49669800  |
| H | -1.04844100 | -2.44347800 | 1.89003500  |
| H | -3.39054000 | -3.82115400 | -0.66358100 |
| H | -4.29432000 | -2.48527300 | 0.03799000  |
| H | -3.59193200 | -2.33049900 | -1.59615900 |
| C | 0.37365200  | -0.28698100 | 0.30003300  |
| C | 0.72950500  | -0.60153000 | 1.57441000  |
| C | 1.11105500  | -0.20530400 | -0.92311300 |
| H | 1.74626100  | -0.86747900 | 1.82596400  |
| H | 0.00274500  | -0.52352200 | 2.37536900  |
| H | 0.55421800  | -0.07201500 | -1.84329200 |
| C | 2.50662800  | -0.31863100 | -1.09106000 |
| O | 3.13252200  | -0.27237900 | -2.15908100 |
| O | 3.20041000  | -0.47918900 | 0.09213000  |
| C | 4.61494700  | -0.56358400 | -0.02998200 |
| C | 5.17767900  | -0.73264900 | 1.36673400  |
| H | 5.00231300  | 0.34250100  | -0.50874700 |
| H | 4.88369900  | -1.40822400 | -0.67359800 |
| H | 6.26793300  | -0.79810100 | 1.33195500  |
| H | 4.90040800  | 0.11672200  | 1.99636400  |
| H | 4.79054300  | -1.64493200 | 1.82816200  |

---

**TS1-1**

|   |              |              |              |
|---|--------------|--------------|--------------|
| C | 1. 56403800  | -2. 14940600 | -0. 51102300 |
| C | 0. 30196700  | -2. 56819000 | -0. 72859800 |
| C | 0. 18043400  | -0. 50970900 | 0. 17029700  |
| N | 1. 48487400  | -0. 90020800 | 0. 07754700  |
| H | 2. 49648300  | -2. 64643800 | -0. 71470200 |
| H | -0. 04924400 | -3. 49214400 | -1. 15316800 |
| N | -0. 54391900 | -1. 57434800 | -0. 27489800 |
| C | 2. 73499900  | -0. 28693400 | 0. 64847800  |
| C | 3. 52885500  | -1. 40954200 | 1. 33902200  |
| C | 3. 56816300  | 0. 31912200  | -0. 47905300 |
| C | 2. 41410300  | 0. 76195600  | 1. 70659300  |
| H | 2. 90128900  | -1. 94582600 | 2. 05620600  |
| H | 3. 95402800  | -2. 12636500 | 0. 63398300  |
| H | 4. 36295700  | -0. 95649700 | 1. 87940100  |
| H | 3. 07054800  | 1. 19959700  | -0. 88333700 |
| H | 4. 54429600  | 0. 61714300  | -0. 08635200 |
| H | 3. 72969300  | -0. 40654800 | -1. 28175100 |
| H | 3. 34942000  | 1. 04476900  | 2. 19601900  |
| H | 1. 97908400  | 1. 65080000  | 1. 25744400  |
| H | 1. 74305300  | 0. 35169900  | 2. 46702600  |
| C | -2. 02837300 | -1. 81663500 | -0. 22781500 |
| C | -2. 25287200 | -3. 29366200 | 0. 13526200  |
| C | -2. 67758400 | -0. 97056100 | 0. 86496500  |
| C | -2. 62554000 | -1. 52920300 | -1. 60585200 |
| H | -1. 96706700 | -3. 97840000 | -0. 66600300 |
| H | -1. 71137300 | -3. 56334200 | 1. 04651200  |
| H | -3. 32056300 | -3. 43899700 | 0. 31395600  |
| H | -2. 67269700 | 0. 08104200  | 0. 59373100  |
| H | -3. 71143100 | -1. 30626700 | 0. 98482700  |
| H | -2. 16023900 | -1. 11053000 | 1. 81943900  |
| H | -3. 69839500 | -1. 74307300 | -1. 58514600 |
| H | -2. 46036200 | -0. 48444300 | -1. 86485900 |
| H | -2. 16557100 | -2. 17573800 | -2. 36049800 |
| C | -1. 87022700 | 2. 20728600  | 1. 75706800  |
| C | -3. 04869000 | 2. 62987900  | 2. 12909900  |
| C | -0. 70096500 | 1. 75460600  | 1. 38972400  |
| H | -3. 34814200 | 3. 66531500  | 1. 99564300  |
| H | -3. 76651200 | 1. 95114600  | 2. 58227600  |
| H | 0. 12489200  | 1. 78712100  | 2. 09044300  |
| C | -0. 47746800 | 1. 21739900  | -0. 02085300 |
| O | -1. 46069800 | 1. 15729900  | -0. 80046200 |
| O | 0. 70250500  | 1. 85174900  | -0. 52205600 |
| C | 0. 75087600  | 1. 93215400  | -1. 94399800 |
| C | 0. 05283100  | 3. 18031700  | -2. 45846000 |
| H | 0. 30910600  | 1. 03172500  | -2. 38302800 |
| H | 1. 81114400  | 1. 95908900  | -2. 21205100 |
| H | 0. 16222100  | 3. 26073500  | -3. 54427300 |

---

|   |             |            |             |
|---|-------------|------------|-------------|
| H | -1.00716500 | 3.13838600 | -2.20645400 |
| H | 0.49213700  | 4.07227900 | -2.00280900 |

**M1-1**

|   |             |             |             |
|---|-------------|-------------|-------------|
| C | -0.98361400 | -2.62746400 | -0.13895800 |
| C | 0.34258100  | -2.78660600 | 0.01730500  |
| C | -0.07555100 | -0.59889200 | 0.02784600  |
| N | -1.24992600 | -1.27305400 | -0.15581500 |
| H | -1.73871900 | -3.38241200 | -0.24320900 |
| H | 0.90533100  | -3.69880000 | 0.06487000  |
| N | 0.91251000  | -1.53456800 | 0.10205100  |
| C | -2.69452000 | -0.81555800 | -0.32474600 |
| C | -3.50721800 | -1.97652800 | -0.92377200 |
| C | -3.27910000 | -0.49380500 | 1.05223200  |
| C | -2.80864100 | 0.34193400  | -1.31790200 |
| H | -3.06441500 | -2.35063600 | -1.85077600 |
| H | -3.64711500 | -2.80315700 | -0.22422300 |
| H | -4.49970600 | -1.58711100 | -1.15702600 |
| H | -2.75641700 | 0.33891400  | 1.51445800  |
| H | -4.33682400 | -0.24157600 | 0.93438700  |
| H | -3.20955200 | -1.37369000 | 1.69897300  |
| H | -3.87198100 | 0.53997900  | -1.47561000 |
| H | -2.34128800 | 1.24831600  | -0.94744900 |
| H | -2.37735500 | 0.05434500  | -2.28200800 |
| C | 2.42254700  | -1.41496600 | 0.27456700  |
| C | 3.06583900  | -2.75361900 | -0.11972700 |
| C | 3.00044700  | -0.34932600 | -0.65719000 |
| C | 2.72314900  | -1.14694000 | 1.75010700  |
| H | 2.83319000  | -3.56099400 | 0.57814200  |
| H | 2.79486300  | -3.05666000 | -1.13509800 |
| H | 4.14729100  | -2.60942500 | -0.08860900 |
| H | 2.70360400  | 0.64519000  | -0.33775400 |
| H | 4.09038700  | -0.43421500 | -0.62708800 |
| H | 2.67472000  | -0.52641600 | -1.68706400 |
| H | 3.80751200  | -1.08287400 | 1.88214700  |
| H | 2.25279100  | -0.21366500 | 2.05267800  |
| H | 2.35400300  | -1.97602200 | 2.36236000  |
| C | 1.26655800  | 2.36094200  | -1.59602100 |
| C | 2.24483700  | 3.16830200  | -1.91265100 |
| C | 0.30655800  | 1.54881500  | -1.24932800 |
| H | 2.15591700  | 4.24257800  | -1.77499000 |
| H | 3.17591700  | 2.78807900  | -2.32476900 |
| H | -0.45589700 | 1.28296800  | -1.97694900 |
| C | 0.19972000  | 0.97644600  | 0.19701600  |
| O | 1.19043200  | 1.22614200  | 0.97520700  |
| O | -1.09211100 | 1.45785400  | 0.70741900  |
| C | -0.99472800 | 2.50091600  | 1.65933400  |
| C | -0.60156800 | 3.83876100  | 1.04862500  |
| H | -0.28215600 | 2.22433800  | 2.44094200  |

---

|   |             |            |            |
|---|-------------|------------|------------|
| H | -1.99359000 | 2.56647000 | 2.10671300 |
| H | -0.65988200 | 4.63081200 | 1.80169100 |
| H | 0.42088000  | 3.78596600 | 0.66865300 |
| H | -1.26994200 | 4.09661100 | 0.22153200 |

**TS1-2**

|   |             |             |             |
|---|-------------|-------------|-------------|
| C | 1.18816600  | 1.09890400  | -1.69149300 |
| C | 1.81541600  | -0.08857900 | -1.82022900 |
| C | 1.66107700  | 0.35952800  | 0.40156400  |
| N | 1.09262500  | 1.35802100  | -0.33119900 |
| H | 0.81941600  | 1.77149900  | -2.44840900 |
| H | 2.07750600  | -0.63556300 | -2.70952400 |
| N | 2.10756500  | -0.52443500 | -0.53687600 |
| C | 0.59812600  | 2.67786300  | 0.15211900  |
| C | 1.61531600  | 3.73914400  | -0.28283200 |
| C | -0.77355100 | 2.95631000  | -0.47037900 |
| C | 0.46785600  | 2.69230600  | 1.67029500  |
| H | 2.59248900  | 3.52956100  | 0.16167400  |
| H | 1.72543300  | 3.76436200  | -1.37038300 |
| H | 1.28353300  | 4.72625800  | 0.04981200  |
| H | -1.47865100 | 2.16127900  | -0.21213700 |
| H | -1.15624300 | 3.90302100  | -0.08016500 |
| H | -0.72313800 | 3.04431300  | -1.55854500 |
| H | 0.19642000  | 3.70496900  | 1.97836500  |
| H | -0.32042600 | 2.01215000  | 2.00089800  |
| H | 1.41194700  | 2.42654800  | 2.15165000  |
| C | 2.81652400  | -1.80198200 | -0.25094800 |
| C | 3.74599000  | -1.60491400 | 0.94904400  |
| C | 1.78408700  | -2.91237300 | -0.02248600 |
| C | 3.68456500  | -2.17848600 | -1.45750200 |
| H | 4.50165700  | -0.84995500 | 0.71446100  |
| H | 3.21949000  | -1.28467500 | 1.84694800  |
| H | 4.25300000  | -2.54903000 | 1.16363800  |
| H | 1.15800200  | -3.02374700 | -0.91291600 |
| H | 2.29679400  | -3.86096500 | 0.15886300  |
| H | 1.12859200  | -2.70421600 | 0.82439300  |
| H | 4.30375400  | -3.03545100 | -1.18252600 |
| H | 3.08576800  | -2.47336400 | -2.32274400 |
| H | 4.34381400  | -1.35348700 | -1.74136900 |
| C | -0.62831600 | -0.66891700 | 1.74375900  |
| C | 0.67543100  | -0.40414000 | 2.05215000  |
| C | -1.44115800 | -0.55459000 | 0.69880300  |
| H | 0.88227400  | 0.40146200  | 2.74874800  |
| H | 1.32394500  | -1.26118500 | 2.20749700  |
| H | -1.09861500 | -0.15126100 | -0.26069700 |
| C | -2.86599300 | -0.93242100 | 0.75487800  |
| O | -3.45026600 | -1.45416900 | 1.68433800  |
| O | -3.49300500 | -0.61086300 | -0.39796600 |
| C | -4.88984000 | -0.92509500 | -0.45781500 |

---

|   |             |             |             |
|---|-------------|-------------|-------------|
| C | -5.39847600 | -0.46820000 | -1.80752100 |
| H | -5.40471400 | -0.41896600 | 0.36422200  |
| H | -5.01963600 | -2.00251900 | -0.31622500 |
| H | -6.46522100 | -0.68539600 | -1.89635700 |
| H | -5.25230600 | 0.60771400  | -1.92886200 |
| H | -4.87135600 | -0.98434800 | -2.61319700 |

**M1-2**

|   |             |             |             |
|---|-------------|-------------|-------------|
| C | 1.58594300  | 1.12787400  | -1.67889300 |
| C | 2.06348600  | -0.13238100 | -1.72860300 |
| C | 1.43431700  | 0.27669000  | 0.36886000  |
| N | 1.19704600  | 1.38023600  | -0.37611900 |
| H | 1.48923400  | 1.85620800  | -2.46528400 |
| H | 2.46191900  | -0.67835500 | -2.56388300 |
| N | 1.96535400  | -0.65927600 | -0.45449500 |
| C | 0.56676500  | 2.71118900  | -0.04292000 |
| C | 1.52421200  | 3.80317300  | -0.53623500 |
| C | -0.77255800 | 2.77697500  | -0.78409300 |
| C | 0.33208100  | 2.92267800  | 1.45061200  |
| H | 2.50545400  | 3.69287200  | -0.06724400 |
| H | 1.64877100  | 3.79679700  | -1.62081600 |
| H | 1.11406000  | 4.77693900  | -0.25874500 |
| H | -1.44479100 | 1.99495900  | -0.42203300 |
| H | -1.23114000 | 3.75248500  | -0.60316200 |
| H | -0.64204300 | 2.65942600  | -1.86308200 |
| H | -0.11896900 | 3.91198100  | 1.55871400  |
| H | -0.35657900 | 2.18797200  | 1.87252400  |
| H | 1.27094100  | 2.92624300  | 2.00933800  |
| C | 2.43744000  | -2.03935900 | -0.08172700 |
| C | 3.57599100  | -1.92534700 | 0.93797800  |
| C | 1.25530500  | -2.87630500 | 0.41915200  |
| C | 2.99562900  | -2.72040600 | -1.33418800 |
| H | 4.39142600  | -1.32889000 | 0.52025300  |
| H | 3.26943800  | -1.47559200 | 1.88211200  |
| H | 3.95634200  | -2.92719000 | 1.15234500  |
| H | 0.49882800  | -2.95664600 | -0.36637900 |
| H | 1.61888300  | -3.88015100 | 0.65363300  |
| H | 0.77203800  | -2.46788700 | 1.30557100  |
| H | 3.32984200  | -3.71875800 | -1.04581500 |
| H | 2.23304200  | -2.83496000 | -2.10873100 |
| H | 3.85645400  | -2.18483500 | -1.74289200 |
| C | -0.53368700 | -0.17855600 | 1.97322300  |
| C | 0.97335900  | 0.04687900  | 1.77800900  |
| C | -1.23638300 | -0.40175100 | 0.83500900  |
| H | 1.32007900  | 0.86903100  | 2.40463100  |
| H | 1.48588300  | -0.82851300 | 2.17548700  |
| H | -0.85178300 | -0.42531800 | -0.19662900 |
| C | -2.69005000 | -0.61825900 | 0.88117300  |
| O | -3.41572600 | -0.69352400 | 1.85728900  |

---

|   |             |             |             |
|---|-------------|-------------|-------------|
| O | -3.20538300 | -0.72583000 | -0.37665200 |
| C | -4.61668700 | -0.93234000 | -0.45460900 |
| C | -4.98001900 | -1.04815900 | -1.91956000 |
| H | -5.13208500 | -0.09384600 | 0.02507200  |
| H | -4.88157300 | -1.83808800 | 0.10045400  |
| H | -6.05578100 | -1.20474800 | -2.02780400 |
| H | -4.70713300 | -0.13714500 | -2.45762700 |
| H | -4.45955100 | -1.89144900 | -2.37992200 |

**TS2**

|   |             |             |             |
|---|-------------|-------------|-------------|
| C | 2.20341800  | -3.84646200 | -0.92241500 |
| C | 3.14683400  | -3.35954900 | -0.08809900 |
| C | 1.46498400  | -1.90733600 | -0.12846600 |
| N | 1.16472500  | -2.94422700 | -0.94590400 |
| H | 2.20454000  | -4.75895300 | -1.48906000 |
| H | 4.09387600  | -3.78606800 | 0.18490400  |
| N | 2.68770400  | -2.16108200 | 0.40999000  |
| C | -0.06512700 | -3.13636200 | -1.80017400 |
| C | 0.11419000  | -4.39531400 | -2.65061800 |
| C | -1.28147900 | -3.32486500 | -0.89366200 |
| C | -0.18224900 | -1.92950200 | -2.72430700 |
| H | 0.99147400  | -4.33303300 | -3.30004700 |
| H | 0.17008700  | -5.30212600 | -2.04223700 |
| H | -0.76757700 | -4.47966700 | -3.28877700 |
| H | -1.52531500 | -2.41315500 | -0.35326700 |
| H | -2.14324100 | -3.58004700 | -1.51513500 |
| H | -1.09800300 | -4.14577300 | -0.19336600 |
| H | -1.05746900 | -2.05447500 | -3.36522300 |
| H | -0.33360000 | -1.01732100 | -2.15441000 |
| H | 0.71423900  | -1.84757300 | -3.34683100 |
| C | 3.54181500  | -1.31425700 | 1.33141000  |
| C | 4.23756800  | -0.24137500 | 0.49190800  |
| C | 2.71487900  | -0.71090700 | 2.46696200  |
| C | 4.60446400  | -2.22068400 | 1.96608700  |
| H | 4.81113900  | -0.70610300 | -0.31533300 |
| H | 3.52996800  | 0.47073700  | 0.06693700  |
| H | 4.93154500  | 0.30920900  | 1.13372800  |
| H | 2.15392600  | -1.48892900 | 2.99272100  |
| H | 3.41232400  | -0.25225200 | 3.17290800  |
| H | 2.02106300  | 0.05621200  | 2.13360600  |
| H | 5.14289800  | -1.62775300 | 2.70743300  |
| H | 4.15215300  | -3.07510100 | 2.47707600  |
| H | 5.34169600  | -2.57484400 | 1.24248500  |
| C | 0.62839400  | -0.71012000 | 0.21285200  |
| C | -0.27303100 | -0.87334200 | 1.20436700  |
| C | 0.95968000  | 0.55429600  | -0.44824900 |
| H | -0.81082800 | -0.02805500 | 1.60683800  |
| H | -0.41920700 | -1.84489000 | 1.66690300  |
| H | 1.61460400  | 0.45698900  | -1.31273900 |



---

|   |             |             |             |
|---|-------------|-------------|-------------|
| C | 1.34265000  | 1.71998300  | 0.33563400  |
| O | 2.22320200  | 2.51094100  | 0.02480400  |
| O | 0.58291500  | 1.90256300  | 1.44652300  |
| C | 0.90007500  | 3.05054200  | 2.24552000  |
| C | 2.07371800  | 2.77587700  | 3.16725300  |
| H | -0.01104800 | 3.25549200  | 2.81238000  |
| H | 1.10609100  | 3.89452700  | 1.58363000  |
| H | 2.29108700  | 3.66062800  | 3.77138100  |
| H | 1.85106000  | 1.94331200  | 3.83962400  |
| H | 2.96091700  | 2.52776000  | 2.57910500  |
| C | -2.74204700 | 0.01375400  | -0.56195500 |
| O | -2.70269500 | -0.68955500 | -1.59445600 |
| C | -3.77346700 | -0.35040400 | 0.48774400  |
| C | -4.75226700 | -1.28581300 | 0.13706400  |
| C | -3.78808600 | 0.17580800  | 1.78489300  |
| C | -5.72867300 | -1.67826500 | 1.04680400  |
| H | -4.72257500 | -1.69540900 | -0.86707200 |
| C | -4.76214600 | -0.21692000 | 2.69956900  |
| H | -3.02960600 | 0.88652800  | 2.09794900  |
| C | -5.73737300 | -1.14283600 | 2.33362700  |
| H | -6.48327200 | -2.40223500 | 0.75399900  |
| H | -4.75612900 | 0.19741700  | 3.70305700  |
| H | -6.49557800 | -1.44816600 | 3.04808600  |
| C | -1.91808900 | 1.15266800  | -0.34555700 |
| C | -0.86879400 | 1.43338100  | -1.22658600 |
| H | -2.09437100 | 1.78723600  | 0.51412800  |
| H | -0.86032900 | 0.80617900  | -2.11439400 |
| C | -0.39596700 | 2.81506700  | -1.49786100 |
| C | 0.36382500  | 3.06562400  | -2.64695600 |
| C | -0.69684100 | 3.89192900  | -0.65513700 |
| C | 0.80303900  | 4.34914300  | -2.95349600 |
| H | 0.60880400  | 2.23563200  | -3.30594800 |
| C | -0.25189700 | 5.17674100  | -0.95403800 |
| H | -1.28986500 | 3.72677200  | 0.23925700  |
| C | 0.49765900  | 5.41226600  | -2.10472300 |
| H | 1.38294600  | 4.52169400  | -3.85504200 |
| H | -0.49841600 | 5.99887600  | -0.28878800 |
| H | 0.83765100  | 6.41570100  | -2.34039600 |

## M2

|   |             |             |             |
|---|-------------|-------------|-------------|
| C | -3.91905100 | -2.46190700 | 0.68647700  |
| C | -4.49333900 | -1.63426500 | -0.21390500 |
| C | -2.33941100 | -1.11809100 | -0.09863200 |
| N | -2.58309900 | -2.14094800 | 0.75529300  |
| H | -4.36698100 | -3.25015700 | 1.26208300  |
| H | -5.51642300 | -1.59210000 | -0.53775800 |
| N | -3.51198500 | -0.80351300 | -0.70401300 |
| C | -1.63704000 | -2.80207700 | 1.73482200  |
| C | -2.33171200 | -4.03188600 | 2.32550100  |

---

|   |             |             |             |
|---|-------------|-------------|-------------|
| C | -0.35386800 | -3.26139400 | 1.03749800  |
| C | -1.36172000 | -1.79668500 | 2.85229700  |
| H | -3.21993900 | -3.77439700 | 2.90672800  |
| H | -2.59487300 | -4.75783200 | 1.55105000  |
| H | -1.62478200 | -4.50707000 | 3.00765200  |
| H | 0.35385600  | -2.45564000 | 0.84314400  |
| H | 0.15057200  | -3.96308900 | 1.70721200  |
| H | -0.59277300 | -3.79020300 | 0.10998600  |
| H | -0.63980500 | -2.22513700 | 3.55234900  |
| H | -0.94072700 | -0.87318000 | 2.45490500  |
| H | -2.28156800 | -1.55841000 | 3.39325400  |
| C | -3.83650600 | 0.33660700  | -1.64682200 |
| C | -3.95570200 | 1.60629200  | -0.80422500 |
| C | -2.78740700 | 0.47545100  | -2.75117500 |
| C | -5.18312600 | 0.04155300  | -2.31653700 |
| H | -4.74808900 | 1.49496900  | -0.05895600 |
| H | -3.02244500 | 1.84710200  | -0.29343600 |
| H | -4.20889800 | 2.44556000  | -1.45807200 |
| H | -2.62042400 | -0.48197700 | -3.25225800 |
| H | -3.17653400 | 1.18581100  | -3.48497100 |
| H | -1.83333700 | 0.85675700  | -2.39561300 |
| H | -5.35828400 | 0.82235800  | -3.05840900 |
| H | -5.17418500 | -0.92278600 | -2.83174600 |
| H | -6.01723500 | 0.07482800  | -1.61271300 |
| C | -1.00556200 | -0.52301100 | -0.41404500 |
| C | -0.31921500 | -1.10777100 | -1.39981900 |
| C | -0.52640200 | 0.70469800  | 0.34641000  |
| H | 0.64329200  | -0.72145500 | -1.70927600 |
| H | -0.71221100 | -1.98769600 | -1.90201700 |
| H | -1.24389700 | 0.93466900  | 1.14124400  |
| C | -0.47782300 | 1.97736500  | -0.48294200 |
| O | -0.98746100 | 3.02146600  | -0.13713500 |
| O | 0.25044500  | 1.85079400  | -1.59769600 |
| C | 0.48305000  | 3.06148800  | -2.34814300 |
| C | -0.68999200 | 3.38682400  | -3.25105500 |
| H | 1.38726900  | 2.85492400  | -2.92214600 |
| H | 0.67933000  | 3.87032300  | -1.64078200 |
| H | -0.47887500 | 4.30297700  | -3.80819600 |
| H | -0.86280200 | 2.58001500  | -3.96730300 |
| H | -1.59597500 | 3.54042800  | -2.65964000 |
| C | 2.73046400  | -1.02738900 | 0.40028500  |
| O | 2.50129800  | -1.85383500 | 1.34738100  |
| C | 3.86457700  | -1.38230700 | -0.54397200 |
| C | 4.24224800  | -2.72548100 | -0.64276100 |
| C | 4.56984900  | -0.44152500 | -1.30490200 |
| C | 5.26631900  | -3.12596100 | -1.49648100 |
| H | 3.70985600  | -3.44271200 | -0.02662500 |
| C | 5.59976200  | -0.83536200 | -2.15562600 |

---

|   |             |             |             |
|---|-------------|-------------|-------------|
| H | 4.32635900  | 0.61273500  | -1.21222400 |
| C | 5.94964100  | -2.18095600 | -2.26035000 |
| H | 5.53655600  | -4.17604700 | -1.56427600 |
| H | 6.13893400  | -0.08792100 | -2.73054400 |
| H | 6.75423900  | -2.48759800 | -2.92162600 |
| C | 2.02549000  | 0.13098000  | 0.13873700  |
| C | 0.90659600  | 0.53746900  | 1.03720800  |
| H | 2.26984500  | 0.74229500  | -0.72086400 |
| H | 0.79990400  | -0.28828200 | 1.74923800  |
| C | 1.15974700  | 1.80890000  | 1.84413200  |
| C | 0.56763200  | 1.98055200  | 3.09924500  |
| C | 1.95491200  | 2.84226100  | 1.34081000  |
| C | 0.76616800  | 3.14687200  | 3.83461300  |
| H | -0.05179900 | 1.18514500  | 3.51021600  |
| C | 2.14989400  | 4.01460200  | 2.06650600  |
| H | 2.43708300  | 2.71428100  | 0.37535500  |
| C | 1.55715200  | 4.17104000  | 3.31814600  |
| H | 0.30649600  | 3.25472700  | 4.81244000  |
| H | 2.77171300  | 4.80518300  | 1.65722700  |
| H | 1.71515500  | 5.08111800  | 3.88822000  |

**TS2'**

|   |             |             |             |
|---|-------------|-------------|-------------|
| C | 0.96631000  | -0.52931600 | -0.02268400 |
| C | 1.17117600  | 0.36753800  | -1.10017600 |
| C | 0.01469500  | -1.52309700 | 0.08438600  |
| H | 1.09431400  | -0.02681600 | -2.10427600 |
| H | 1.94222600  | 1.12120200  | -0.96069900 |
| H | -0.08872400 | -2.05674800 | 1.02382600  |
| C | -0.73150300 | -2.14059600 | -1.00143700 |
| O | -1.56536000 | -3.02007700 | -0.84071000 |
| O | -0.35259700 | -1.71726800 | -2.22414800 |
| C | -1.02282600 | -2.31262300 | -3.34170000 |
| C | -0.35854900 | -3.62367900 | -3.72020900 |
| H | -0.93935100 | -1.57428600 | -4.14243200 |
| H | -2.07402400 | -2.44185700 | -3.08767300 |
| H | -0.83178600 | -4.04506300 | -4.61115100 |
| H | 0.70310300  | -3.47102600 | -3.93245700 |
| H | -0.45488600 | -4.34170400 | -2.90260600 |
| C | -2.67517100 | 0.14108200  | -0.87047300 |
| O | -2.85334900 | -0.42210900 | -1.96848800 |
| C | -3.61378400 | -0.21554500 | 0.26197300  |
| C | -4.21351800 | -1.47842800 | 0.23245200  |
| C | -3.92084800 | 0.65064000  | 1.31756400  |
| C | -5.07739500 | -1.87940300 | 1.24682500  |
| H | -3.96239500 | -2.13707000 | -0.59130800 |
| C | -4.79666600 | 0.25640700  | 2.32648800  |
| H | -3.49292600 | 1.64837500  | 1.34740900  |
| C | -5.37288600 | -1.01221300 | 2.29791800  |
| H | -5.52364000 | -2.86910400 | 1.21833800  |

---

|   |             |             |             |
|---|-------------|-------------|-------------|
| H | -5.03282700 | 0.94318600  | 3.13367000  |
| H | -6.05120600 | -1.32088200 | 3.08734500  |
| C | -1.65983800 | 1.10808000  | -0.60383800 |
| C | -0.65888700 | 1.40951100  | -1.53262800 |
| H | -1.66156400 | 1.59107100  | 0.36631100  |
| H | -0.78139000 | 0.87753400  | -2.47455800 |
| C | -0.05634300 | 2.76287200  | -1.68624000 |
| C | 0.86690000  | 2.99803200  | -2.71644400 |
| C | -0.41296900 | 3.84093300  | -0.86695400 |
| C | 1.43414500  | 4.25262800  | -2.90416600 |
| H | 1.14316200  | 2.17541600  | -3.37193600 |
| C | 0.16134000  | 5.09789400  | -1.04538500 |
| H | -1.16368600 | 3.69812100  | -0.09588400 |
| C | 1.08936200  | 5.31000100  | -2.06171200 |
| H | 2.14662500  | 4.40769600  | -3.70850000 |
| H | -0.12947500 | 5.91765300  | -0.39551400 |
| H | 1.53181200  | 6.29069100  | -2.20409800 |
| C | 1.90081500  | -0.46586100 | 1.14292600  |
| N | 3.07930300  | -1.13894500 | 1.16267300  |
| N | 1.74948100  | 0.12446000  | 2.35004400  |
| C | 3.66575000  | -0.95731200 | 2.39648500  |
| C | 3.77718700  | -1.88306200 | 0.04072600  |
| C | 2.84220900  | -0.17848400 | 3.13206500  |
| C | 0.63977600  | 1.04332800  | 2.79152300  |
| H | 4.61019300  | -1.39050900 | 2.66930400  |
| C | 4.87693200  | -2.75161000 | 0.66176700  |
| C | 2.82069600  | -2.80282500 | -0.72470600 |
| C | 4.41546700  | -0.85005700 | -0.88974200 |
| H | 2.95837600  | 0.17403600  | 4.14051700  |
| C | 0.60932700  | 2.21997200  | 1.82064200  |
| C | -0.68422600 | 0.27914700  | 2.82092700  |
| C | 0.94793000  | 1.55632800  | 4.19793200  |
| H | 5.68136800  | -2.15575800 | 1.09842300  |
| H | 4.47530600  | -3.43435300 | 1.41546500  |
| H | 5.31813900  | -3.34849200 | -0.13810700 |
| H | 2.13824300  | -2.25541600 | -1.37334600 |
| H | 3.43212000  | -3.45684200 | -1.35152600 |
| H | 2.23995100  | -3.42584100 | -0.03973000 |
| H | 5.01005400  | -1.37358900 | -1.64323100 |
| H | 3.65355700  | -0.25840100 | -1.39915700 |
| H | 5.07555800  | -0.18281600 | -0.32853500 |
| H | 1.54479400  | 2.78513600  | 1.87187000  |
| H | 0.46089300  | 1.87859600  | 0.79684800  |
| H | -0.21573900 | 2.88612800  | 2.08889600  |
| H | -0.60012500 | -0.60363900 | 3.46196000  |
| H | -1.45398600 | 0.93492600  | 3.23811400  |
| H | -1.00150200 | -0.02700700 | 1.82411100  |
| H | 0.14756900  | 2.24538200  | 4.47500400  |

---

|   |            |            |            |
|---|------------|------------|------------|
| H | 0.96255100 | 0.74926400 | 4.93541700 |
| H | 1.89064000 | 2.10812700 | 4.23701700 |

**M2'**

|   |             |             |             |
|---|-------------|-------------|-------------|
| C | 1.13627200  | -0.52005100 | 0.04430500  |
| C | 0.94462400  | 0.48235600  | -1.06627600 |
| C | 0.41332700  | -1.63034500 | 0.24385900  |
| H | 1.30842200  | 0.03514800  | -1.99870400 |
| H | 1.59166100  | 1.34106700  | -0.86186400 |
| H | 0.60062000  | -2.25460600 | 1.11421100  |
| C | -0.60654500 | -2.20379800 | -0.67601200 |
| O | -1.46317100 | -2.97810400 | -0.30602900 |
| O | -0.35731200 | -1.89981000 | -1.95207500 |
| C | -1.21709000 | -2.51034800 | -2.93708300 |
| C | -0.74141200 | -3.91676700 | -3.24692700 |
| H | -1.13661600 | -1.85696900 | -3.80747900 |
| H | -2.23878000 | -2.46853500 | -2.56464100 |
| H | -1.35283700 | -4.34790000 | -4.04377300 |
| H | 0.30058400  | -3.90970700 | -3.57737100 |
| H | -0.82787000 | -4.55235500 | -2.36302200 |
| C | -2.73690500 | -0.02721400 | -0.68130400 |
| O | -3.05968300 | -0.41977500 | -1.84948000 |
| C | -3.70707600 | -0.35642800 | 0.44140600  |
| C | -4.61965400 | -1.39604700 | 0.23557100  |
| C | -3.75574500 | 0.32810100  | 1.66339100  |
| C | -5.52895100 | -1.76608700 | 1.22297500  |
| H | -4.59623700 | -1.90049100 | -0.72427600 |
| C | -4.66607900 | -0.03430500 | 2.65326200  |
| H | -3.08896800 | 1.16789700  | 1.83883600  |
| C | -5.55449900 | -1.08800600 | 2.44041900  |
| H | -6.22221000 | -2.58288000 | 1.04286700  |
| H | -4.68928900 | 0.51429900  | 3.59044800  |
| H | -6.26511200 | -1.36938400 | 3.21143800  |
| C | -1.56622200 | 0.61872200  | -0.32891500 |
| C | -0.54056300 | 0.98615600  | -1.34754300 |
| H | -1.40751200 | 0.88909300  | 0.70629000  |
| H | -0.86391400 | 0.48290300  | -2.26501700 |
| C | -0.44266500 | 2.47873500  | -1.67553900 |
| C | 0.32915600  | 2.89947400  | -2.76735000 |
| C | -1.09403500 | 3.45437400  | -0.91843400 |
| C | 0.45088500  | 4.24765300  | -3.08903200 |
| H | 0.83715300  | 2.15501300  | -3.37737400 |
| C | -0.97000300 | 4.80853600  | -1.23113500 |
| H | -1.71586500 | 3.13743400  | -0.08604000 |
| C | -0.19758400 | 5.21155800  | -2.31670200 |
| H | 1.04855400  | 4.54761900  | -3.94458800 |
| H | -1.48444200 | 5.54943500  | -0.62626400 |
| H | -0.10506400 | 6.26433700  | -2.56399400 |
| C | 2.26877000  | -0.32078900 | 0.99178700  |

---

|   |             |             |             |
|---|-------------|-------------|-------------|
| N | 3.52644100  | -0.77363600 | 0.78085700  |
| N | 2.23618100  | 0.26705700  | 2.20831400  |
| C | 4.28984100  | -0.46027700 | 1.88434100  |
| C | 4.12528700  | -1.37650900 | -0.47409200 |
| C | 3.49094200  | 0.17859700  | 2.76871000  |
| C | 1.07573200  | 0.98329700  | 2.86128900  |
| H | 5.33002300  | -0.71451900 | 1.97114800  |
| C | 5.43233700  | -2.07592000 | -0.08601900 |
| C | 3.20005000  | -2.41834400 | -1.11113000 |
| C | 4.42552900  | -0.22871600 | -1.43979000 |
| H | 3.72709500  | 0.56300100  | 3.74389700  |
| C | 0.69302700  | 2.16525200  | 1.97049800  |
| C | -0.08435100 | 0.00959000  | 3.08692300  |
| C | 1.53288100  | 1.51538000  | 4.22050300  |
| H | 6.20372300  | -1.37115600 | 0.23079100  |
| H | 5.27101700  | -2.82101800 | 0.69752200  |
| H | 5.81052600  | -2.58816000 | -0.97197800 |
| H | 2.33021200  | -1.98347200 | -1.60173800 |
| H | 3.78106900  | -2.94380400 | -1.87247700 |
| H | 2.86405300  | -3.14981600 | -0.37141700 |
| H | 4.91184100  | -0.63302800 | -2.33114400 |
| H | 3.51265000  | 0.28260000  | -1.74983400 |
| H | 5.09767000  | 0.49781500  | -0.97574700 |
| H | 1.52876200  | 2.86570000  | 1.88734200  |
| H | 0.39881800  | 1.85054300  | 0.97036400  |
| H | -0.15825500 | 2.68709400  | 2.41687100  |
| H | 0.26055200  | -0.86914100 | 3.63924500  |
| H | -0.84328700 | 0.51672100  | 3.68882600  |
| H | -0.55193100 | -0.30901700 | 2.15660200  |
| H | 0.68778000  | 2.04557700  | 4.66319500  |
| H | 1.81428500  | 0.70786200  | 4.90140500  |
| H | 2.35837500  | 2.22538700  | 4.12819600  |

**TS3**

|   |             |            |             |
|---|-------------|------------|-------------|
| C | 2.57692100  | 3.07978800 | 0.76967200  |
| C | 3.59978700  | 2.33693600 | 0.30839700  |
| C | 1.71960200  | 1.44315600 | -0.45624100 |
| N | 1.41194100  | 2.55318800 | 0.25902000  |
| H | 2.59132200  | 3.93599700 | 1.41923100  |
| H | 4.65775800  | 2.45387900 | 0.46091700  |
| N | 3.07064300  | 1.33586500 | -0.47498100 |
| C | 0.10253600  | 3.19601800 | 0.64891500  |
| C | 0.28691800  | 4.71947700 | 0.54382500  |
| C | -1.03519600 | 2.83269600 | -0.29788900 |
| C | -0.19245100 | 2.80017900 | 2.09929700  |
| H | 0.97438100  | 5.12689700 | 1.28713100  |
| H | 0.63084600  | 5.00425200 | -0.45462300 |
| H | -0.68581700 | 5.18538000 | 0.71801200  |
| H | -1.27590100 | 1.77528600 | -0.32412300 |

---

|   |             |             |             |
|---|-------------|-------------|-------------|
| H | -1.92426200 | 3.35078100  | 0.06620700  |
| H | -0.80792100 | 3.18178000  | -1.30988800 |
| H | -1.22222100 | 3.06698000  | 2.34453900  |
| H | -0.04534200 | 1.73000500  | 2.24351600  |
| H | 0.48977700  | 3.32586900  | 2.77630400  |
| C | 4.03257600  | 0.53282600  | -1.32295300 |
| C | 3.39675200  | -0.67166300 | -2.00027100 |
| C | 4.55817600  | 1.49464500  | -2.39586200 |
| C | 5.16820700  | 0.04787800  | -0.41187700 |
| H | 2.96852800  | -1.33868400 | -1.25387800 |
| H | 2.63488900  | -0.39045200 | -2.72257500 |
| H | 4.19848900  | -1.19364000 | -2.53247600 |
| H | 5.05274700  | 2.36457100  | -1.95482000 |
| H | 5.28447300  | 0.96920600  | -3.02206000 |
| H | 3.73826000  | 1.84153100  | -3.03234600 |
| H | 5.78006500  | -0.65662400 | -0.98164600 |
| H | 5.82937300  | 0.86295000  | -0.10422600 |
| H | 4.75625900  | -0.44826700 | 0.47223400  |
| C | 0.76223300  | 0.52188700  | -1.16099900 |
| C | 0.36067100  | 0.92439900  | -2.36993700 |
| C | 0.36195900  | -0.76781500 | -0.47030000 |
| H | -0.32218900 | 0.32172300  | -2.95861500 |
| H | 0.71375800  | 1.85470600  | -2.80779800 |
| H | 1.40314100  | -1.09643100 | 0.20294200  |
| C | 0.09839800  | -1.91638500 | -1.36546000 |
| O | -0.58571600 | -2.88691900 | -1.07232600 |
| O | 0.76021200  | -1.89458200 | -2.55672500 |
| C | 0.74380700  | -3.10627700 | -3.31294100 |
| C | 1.75400300  | -4.09959400 | -2.76560200 |
| H | 0.99918100  | -2.80690600 | -4.33204600 |
| H | -0.26363900 | -3.52799700 | -3.30695100 |
| H | 1.76414000  | -5.00819500 | -3.37351600 |
| H | 2.75680900  | -3.66456300 | -2.77183000 |
| H | 1.49351300  | -4.36867000 | -1.73953700 |
| C | -3.13500600 | 0.39106800  | 0.33444700  |
| O | -3.05999100 | 1.20124000  | 1.33212800  |
| C | -4.43401900 | 0.43290400  | -0.45424500 |
| C | -5.23100100 | 1.57917900  | -0.34511600 |
| C | -4.90444500 | -0.61040800 | -1.26543100 |
| C | -6.42901400 | 1.70167000  | -1.04449900 |
| H | -4.88063900 | 2.36606600  | 0.31467500  |
| C | -6.10503700 | -0.49720600 | -1.96185900 |
| H | -4.33473900 | -1.53213400 | -1.33394200 |
| C | -6.87295700 | 0.66317800  | -1.86150600 |
| H | -7.02226300 | 2.60717900  | -0.94898100 |
| H | -6.44939700 | -1.32317500 | -2.57804400 |
| H | -7.80972800 | 0.75022700  | -2.40345100 |
| C | -2.15214800 | -0.45894100 | -0.11252500 |

---

|   |             |             |             |
|---|-------------|-------------|-------------|
| C | -0.79358600 | -0.57375700 | 0.55166800  |
| H | -2.33383100 | -1.08957900 | -0.97559000 |
| H | -0.59463300 | 0.38434900  | 1.03928900  |
| C | -0.81894500 | -1.56981200 | 1.71678200  |
| C | -0.00115800 | -2.69633300 | 1.83748100  |
| C | -1.74725500 | -1.32636100 | 2.74243700  |
| C | -0.10950100 | -3.55010000 | 2.93646100  |
| H | 0.74927100  | -2.89144300 | 1.08384000  |
| C | -1.85280500 | -2.17329500 | 3.84256500  |
| H | -2.38160300 | -0.44664700 | 2.64923500  |
| C | -1.03496800 | -3.29869800 | 3.94585100  |
| H | 0.53961300  | -4.41979100 | 3.00258500  |
| H | -2.57745700 | -1.95598800 | 4.62348000  |
| H | -1.11550000 | -3.96484400 | 4.80009800  |
| C | 2.72254600  | -0.55554600 | 1.90040300  |
| O | 1.80438400  | 0.29825500  | 2.13442400  |
| O | 3.79577900  | -0.64006200 | 2.58552300  |
| O | 2.57143300  | -1.39207100 | 0.87876600  |

**M3**

|   |             |             |             |
|---|-------------|-------------|-------------|
| C | 0.88451600  | -3.60788500 | 0.81039700  |
| C | -0.16968100 | -3.49902900 | 1.64535000  |
| C | -0.41331500 | -1.98416200 | 0.03862800  |
| N | 0.72768500  | -2.66769200 | -0.18733400 |
| H | 1.72355800  | -4.28010000 | 0.84729000  |
| H | -0.39343500 | -4.05906700 | 2.53422500  |
| N | -0.97950500 | -2.49089200 | 1.16234500  |
| C | 1.70695200  | -2.65616700 | -1.34098000 |
| C | 1.42137100  | -3.91952900 | -2.15763600 |
| C | 1.59024600  | -1.42944100 | -2.24122300 |
| C | 3.11237400  | -2.67941700 | -0.72404500 |
| H | 1.50883200  | -4.82448500 | -1.54960800 |
| H | 0.41369300  | -3.87379200 | -2.58154100 |
| H | 2.14251500  | -3.98617000 | -2.97672900 |
| H | 1.76180300  | -0.51375400 | -1.67100100 |
| H | 2.37216300  | -1.53214100 | -2.99933400 |
| H | 0.62297900  | -1.38092400 | -2.74048500 |
| H | 3.84186800  | -2.45820200 | -1.50721500 |
| H | 3.18798600  | -1.92152600 | 0.06453600  |
| H | 3.36763300  | -3.66076700 | -0.31367100 |
| C | -2.28872800 | -2.10697400 | 1.81256400  |
| C | -2.28227000 | -0.61268800 | 2.10866700  |
| C | -3.44895900 | -2.48566200 | 0.88947900  |
| C | -2.42428000 | -2.87805800 | 3.12720700  |
| H | -1.42419100 | -0.34261200 | 2.73142700  |
| H | -2.26554000 | -0.02827000 | 1.18987200  |
| H | -3.19960700 | -0.36169600 | 2.65010600  |
| H | -3.38858700 | -3.54197200 | 0.60873200  |
| H | -4.38639200 | -2.32251000 | 1.42913800  |



---

|   |             |             |             |
|---|-------------|-------------|-------------|
| H | -3.45257500 | -1.86244700 | -0.00428400 |
| H | -3.35071500 | -2.54914700 | 3.60194200  |
| H | -2.49899800 | -3.95777200 | 2.97064800  |
| H | -1.60107900 | -2.66311300 | 3.81424500  |
| C | -0.98016900 | -0.91952400 | -0.85249100 |
| C | -1.78205800 | -1.47941900 | -1.80750000 |
| C | -0.53398800 | 0.42763900  | -0.59605100 |
| H | -2.28963900 | -0.90312000 | -2.56484700 |
| H | -1.94251400 | -2.55324600 | -1.79752900 |
| H | -3.25407300 | 0.66565300  | -1.21537900 |
| C | -0.82652200 | 1.50689400  | -1.45856300 |
| O | -0.38725900 | 2.66488200  | -1.38737600 |
| O | -1.72578800 | 1.19753700  | -2.47789700 |
| C | -2.11033000 | 2.27401800  | -3.32927200 |
| C | -3.21589200 | 3.10498800  | -2.70083500 |
| H | -2.46008400 | 1.79907800  | -4.25058100 |
| H | -1.23558800 | 2.88815900  | -3.55505800 |
| H | -3.51869300 | 3.91068600  | -3.37657100 |
| H | -4.07829400 | 2.46684400  | -2.49127500 |
| H | -2.85515900 | 3.54573200  | -1.76817100 |
| C | 2.93447500  | 0.53703500  | 0.66236300  |
| O | 2.93789500  | -0.29376800 | 1.65319800  |
| C | 4.29230700  | 0.86169200  | 0.06624000  |
| C | 5.37711100  | 0.05358200  | 0.42989000  |
| C | 4.54255800  | 1.92496600  | -0.81455900 |
| C | 6.65285900  | 0.27181300  | -0.08519200 |
| H | 5.17947800  | -0.74700400 | 1.13512400  |
| C | 5.81612800  | 2.15203300  | -1.32749100 |
| H | 3.73563900  | 2.59629200  | -1.09103500 |
| C | 6.88046000  | 1.32275100  | -0.97096100 |
| H | 7.47428000  | -0.37633300 | 0.20869900  |
| H | 5.98198900  | 2.98483700  | -2.00537200 |
| H | 7.87354000  | 1.50054300  | -1.37245900 |
| C | 1.82415100  | 1.09999000  | 0.08948300  |
| C | 0.42577900  | 0.73925900  | 0.54978300  |
| H | 1.89542600  | 1.78114200  | -0.74981500 |
| H | 0.57415100  | -0.17640100 | 1.14104500  |
| C | -0.08690600 | 1.76222600  | 1.57554900  |
| C | -1.31870600 | 2.41731800  | 1.49877400  |
| C | 0.72802600  | 2.02496900  | 2.68691400  |
| C | -1.71959700 | 3.31013600  | 2.49398600  |
| H | -1.98301300 | 2.20346300  | 0.66659800  |
| C | 0.32753500  | 2.90776100  | 3.68576800  |
| H | 1.67610200  | 1.49396900  | 2.75270400  |
| C | -0.90085600 | 3.56352700  | 3.59128500  |
| H | -2.68234000 | 3.80778500  | 2.41043600  |
| H | 0.97278800  | 3.08539800  | 4.54235500  |
| H | -1.21702100 | 4.25612000  | 4.36586900  |

---

|   |             |            |             |
|---|-------------|------------|-------------|
| C | -5.13554900 | 0.35683200 | -1.04760600 |
| O | -5.15154600 | 0.20506100 | -2.29142600 |
| O | -6.06330000 | 0.25653100 | -0.22373900 |
| O | -3.90255400 | 0.69877000 | -0.49221600 |

**TS4**

|   |             |             |             |
|---|-------------|-------------|-------------|
| C | 0.06727700  | -3.35033500 | 1.57541400  |
| C | -0.94629900 | -2.84538100 | 2.30724300  |
| C | -0.75135100 | -1.60886800 | 0.47793300  |
| N | 0.17941000  | -2.58685100 | 0.43077700  |
| H | 0.71180800  | -4.18786400 | 1.77776900  |
| H | -1.33108000 | -3.16920400 | 3.25681900  |
| N | -1.45761200 | -1.76105100 | 1.62040200  |
| C | 1.13687000  | -3.03434200 | -0.65404800 |
| C | 0.59207500  | -4.36551700 | -1.18304900 |
| C | 1.26013000  | -2.04701700 | -1.81010000 |
| C | 2.51240700  | -3.20520700 | 0.00099800  |
| H | 0.51499500  | -5.11816800 | -0.39419200 |
| H | -0.39538800 | -4.22282100 | -1.63154800 |
| H | 1.27136500  | -4.74561100 | -1.95022200 |
| H | 1.65708600  | -1.08705200 | -1.47151800 |
| H | 1.96994400  | -2.48980800 | -2.51441500 |
| H | 0.31366800  | -1.90318700 | -2.33261800 |
| H | 3.24676400  | -3.40416500 | -0.78401100 |
| H | 2.79663200  | -2.29235100 | 0.53747100  |
| H | 2.53730700  | -4.05440500 | 0.68951500  |
| C | -2.73004400 | -1.07530800 | 2.06981400  |
| C | -2.73043800 | 0.39906300  | 1.68314100  |
| C | -3.91090600 | -1.81051000 | 1.43395600  |
| C | -2.79738800 | -1.17894700 | 3.59836000  |
| H | -1.80304900 | 0.88289200  | 1.99574600  |
| H | -2.90663000 | 0.54284400  | 0.61636600  |
| H | -3.55938900 | 0.87476700  | 2.21539800  |
| H | -3.87041100 | -2.87794500 | 1.67582000  |
| H | -4.83445700 | -1.40422200 | 1.85943800  |
| H | -3.96225200 | -1.67090300 | 0.34931900  |
| H | -3.63776800 | -0.57030500 | 3.93661800  |
| H | -2.98216600 | -2.19819900 | 3.94490800  |
| H | -1.88570800 | -0.79552600 | 4.06550200  |
| C | -1.01354200 | -0.62014200 | -0.61216100 |
| C | -2.05149900 | -1.11753600 | -1.52651900 |
| C | -0.30284300 | 0.54777000  | -0.58830400 |
| H | -1.83424900 | -0.92539600 | -2.57648400 |
| H | -2.24234600 | -2.18142400 | -1.36236100 |
| H | -3.13618300 | -0.46972300 | -1.35596900 |
| C | -0.46150200 | 1.57126400  | -1.64475000 |
| O | 0.16272600  | 2.61907300  | -1.68345000 |
| O | -1.39370500 | 1.26795800  | -2.56449100 |
| C | -1.85407900 | 2.33522300  | -3.40251800 |

---

|   |             |             |             |
|---|-------------|-------------|-------------|
| C | -2.85561300 | 3.18197800  | -2.63629100 |
| H | -2.32517000 | 1.83612900  | -4.25115900 |
| H | -1.00122500 | 2.91829200  | -3.75659500 |
| H | -3.33448000 | 3.90499000  | -3.30199300 |
| H | -3.60850000 | 2.52019400  | -2.19612500 |
| H | -2.34893000 | 3.73178700  | -1.83787700 |
| C | 3.19042800  | 0.26942700  | 0.47735200  |
| O | 3.13011500  | -0.35593300 | 1.60214600  |
| C | 4.53018700  | 0.24201300  | -0.23376800 |
| C | 5.45655000  | -0.73514800 | 0.14948500  |
| C | 4.90588900  | 1.13987400  | -1.24300800 |
| C | 6.69799200  | -0.84024600 | -0.47325200 |
| H | 5.16994400  | -1.40462600 | 0.95372800  |
| C | 6.14845700  | 1.04433600  | -1.86329300 |
| H | 4.22791800  | 1.93611600  | -1.53418400 |
| C | 7.05058500  | 0.04898400  | -1.48656300 |
| H | 7.39511600  | -1.61422600 | -0.16419900 |
| H | 6.41855200  | 1.75530000  | -2.63887900 |
| H | 8.01945100  | -0.02458800 | -1.97082000 |
| C | 2.14363300  | 0.90492300  | -0.14301600 |
| C | 0.75543900  | 0.86872200  | 0.46159700  |
| H | 2.26341900  | 1.41037800  | -1.09269900 |
| H | 0.79179300  | 0.03369400  | 1.17528500  |
| C | 0.47537500  | 2.10599400  | 1.32467100  |
| C | -0.62099100 | 2.95888000  | 1.17847900  |
| C | 1.38828900  | 2.37818100  | 2.35445500  |
| C | -0.79432200 | 4.05867800  | 2.02071000  |
| H | -1.36127800 | 2.76179900  | 0.40921900  |
| C | 1.21491300  | 3.46859100  | 3.20031400  |
| H | 2.22810600  | 1.69735800  | 2.47805700  |
| C | 0.12311800  | 4.32219100  | 3.03284900  |
| H | -1.65319700 | 4.70893400  | 1.88162100  |
| H | 1.93219600  | 3.65493100  | 3.99471800  |
| H | -0.01214200 | 5.17722200  | 3.68802100  |
| C | -5.38442200 | -0.33168800 | -1.42650600 |
| O | -5.30701300 | -1.59907600 | -1.56612400 |
| O | -6.48067600 | 0.31338200  | -1.44990800 |
| O | -4.25631100 | 0.35709600  | -1.24560700 |

**Cs<sub>2</sub>CO<sub>3</sub>**

|    |             |             |             |
|----|-------------|-------------|-------------|
| C  | 0.00207400  | 1.25503800  | 0.03541700  |
| O  | 1.12308500  | 1.88626800  | 0.05122200  |
| O  | -1.11589300 | 1.87961200  | -0.08912300 |
| O  | -0.00060900 | -0.05204300 | 0.14436500  |
| Cs | -2.82557700 | -0.33789100 | -0.00563200 |
| Cs | 2.82439300  | -0.33921600 | -0.01371700 |

**TS3<sub>Cs</sub>**

|   |            |             |            |
|---|------------|-------------|------------|
| C | 1.39633800 | -3.33140200 | 2.04894100 |
|---|------------|-------------|------------|

---

|   |             |             |             |
|---|-------------|-------------|-------------|
| C | 2.13434100  | -2.41916400 | 2.70717400  |
| C | 0.21131900  | -1.45871000 | 2.15450900  |
| N | 0.18972000  | -2.74574400 | 1.73063400  |
| H | 1.64128700  | -4.34263100 | 1.77906700  |
| H | 3.11344600  | -2.51484400 | 3.14197000  |
| N | 1.39300300  | -1.26073700 | 2.78938300  |
| C | -0.79054900 | -3.54333800 | 0.90193000  |
| C | -0.86146500 | -4.95561600 | 1.50436500  |
| C | -2.20495700 | -2.97704900 | 0.92558400  |
| C | -0.23509100 | -3.59629100 | -0.52410100 |
| H | 0.06169200  | -5.52562200 | 1.38620800  |
| H | -1.12054300 | -4.91227600 | 2.56585700  |
| H | -1.64693100 | -5.50558500 | 0.98135000  |
| H | -2.29521000 | -1.98180200 | 0.49819700  |
| H | -2.82130100 | -3.65136700 | 0.32504500  |
| H | -2.60014400 | -2.96930800 | 1.94464200  |
| H | -0.96128900 | -4.08930300 | -1.17510900 |
| H | -0.02928000 | -2.58983300 | -0.89048100 |
| H | 0.69912600  | -4.16725600 | -0.54823200 |
| C | 1.90508700  | -0.16664100 | 3.69765100  |
| C | 1.13016500  | 1.14019700  | 3.60209700  |
| C | 1.79363800  | -0.71023300 | 5.12739900  |
| C | 3.36647500  | 0.11245900  | 3.32232300  |
| H | 1.19928000  | 1.55924400  | 2.59847100  |
| H | 0.08551100  | 1.03316400  | 3.88491200  |
| H | 1.60536800  | 1.83424700  | 4.30174000  |
| H | 2.36801900  | -1.63109700 | 5.25806000  |
| H | 2.17884600  | 0.03550900  | 5.82757000  |
| H | 0.74699800  | -0.91158300 | 5.37457300  |
| H | 3.71226200  | 0.96156200  | 3.91752000  |
| H | 4.02930200  | -0.72596400 | 3.54786900  |
| H | 3.44455000  | 0.36678000  | 2.26202200  |
| C | -0.88452300 | -0.43877600 | 2.02679500  |
| C | -1.87751100 | -0.56747900 | 2.91368800  |
| C | -0.73007000 | 0.62844000  | 0.96929200  |
| H | -2.71414800 | 0.12058700  | 2.91713800  |
| H | -1.86780700 | -1.35357200 | 3.66517600  |
| H | 0.64255700  | 0.75039300  | 0.70700000  |
| C | -1.12333500 | 1.99122200  | 1.32858900  |
| O | -1.02733800 | 2.95564800  | 0.56657900  |
| O | -1.55979600 | 2.19844600  | 2.60133500  |
| C | -1.77821700 | 3.55676000  | 2.99239700  |
| C | -0.47947700 | 4.24150000  | 3.38035200  |
| H | -2.45670000 | 3.49642000  | 3.84616300  |
| H | -2.27438700 | 4.09173600  | 2.18036100  |
| H | -0.67440400 | 5.27465000  | 3.68063100  |
| H | -0.00429900 | 3.72183700  | 4.21571400  |
| H | 0.21053500  | 4.24970800  | 2.53322200  |

---

|    |             |             |             |
|----|-------------|-------------|-------------|
| C  | -3.51495600 | -0.73346000 | -1.19178900 |
| O  | -2.96677000 | -1.56298900 | -2.00000300 |
| C  | -5.02577300 | -0.79158400 | -1.07902300 |
| C  | -5.67138600 | -1.98224300 | -1.43288500 |
| C  | -5.81863800 | 0.28502100  | -0.65910700 |
| C  | -7.05485600 | -2.10992700 | -1.33935300 |
| H  | -5.05151800 | -2.79999200 | -1.78671500 |
| C  | -7.20336600 | 0.16590600  | -0.56989200 |
| H  | -5.34315900 | 1.23216900  | -0.42093400 |
| C  | -7.82948000 | -1.03504200 | -0.90452000 |
| H  | -7.53299200 | -3.04740800 | -1.60978100 |
| H  | -7.79834400 | 1.01607100  | -0.24835800 |
| H  | -8.90912000 | -1.12735700 | -0.83731700 |
| C  | -2.84199300 | 0.14520700  | -0.37329800 |
| C  | -1.33660700 | 0.19456800  | -0.40664000 |
| H  | -3.37062100 | 0.76928200  | 0.34189700  |
| H  | -0.97389600 | -0.82879100 | -0.56453700 |
| C  | -0.81847300 | 0.95599300  | -1.63333000 |
| C  | 0.31886400  | 0.51409400  | -2.31901200 |
| C  | -1.50536600 | 2.05730600  | -2.16112100 |
| C  | 0.76722800  | 1.15594200  | -3.47676900 |
| H  | 0.85393300  | -0.34129200 | -1.91549300 |
| C  | -1.06075100 | 2.70979800  | -3.30875100 |
| H  | -2.40576700 | 2.39061900  | -1.65643800 |
| C  | 0.08286500  | 2.26262900  | -3.97673700 |
| H  | 1.65131100  | 0.78758200  | -3.99107800 |
| H  | -1.61128600 | 3.56467900  | -3.69169500 |
| H  | 0.42471500  | 2.76261300  | -4.87796800 |
| C  | 2.46024600  | -0.11794300 | -0.01471500 |
| O  | 3.68605200  | 0.01613500  | -0.31839300 |
| O  | 1.80333000  | -1.19474600 | -0.17293400 |
| O  | 1.83070300  | 0.94872000  | 0.48387800  |
| Cs | 1.52268200  | 3.53066100  | -0.93289300 |
| Cs | 3.58763700  | -2.27500900 | -2.26318500 |

### **M3<sub>Cs</sub>**

|   |             |             |             |
|---|-------------|-------------|-------------|
| C | 1.92277000  | -2.42497400 | -2.92633000 |
| C | 3.15840100  | -2.66039000 | -2.43276400 |
| C | 1.86163200  | -2.04517400 | -0.74687800 |
| N | 1.11574400  | -2.05002200 | -1.87185200 |
| H | 1.56892700  | -2.49464100 | -3.93850900 |
| H | 4.04863200  | -2.97252900 | -2.94752900 |
| N | 3.11787600  | -2.42811800 | -1.07172100 |
| C | -0.38116700 | -1.88440200 | -2.02386600 |
| C | -1.01468000 | -3.22981500 | -1.66470700 |
| C | -0.92390400 | -0.76340200 | -1.14178500 |
| C | -0.67327500 | -1.50738600 | -3.47814800 |
| H | -0.57035400 | -4.03867300 | -2.25263200 |
| H | -0.89037100 | -3.43590600 | -0.59945300 |

---

|   |             |             |             |
|---|-------------|-------------|-------------|
| H | -2.08524700 | -3.18883500 | -1.88514100 |
| H | -0.45468400 | 0.18094600  | -1.43039000 |
| H | -2.00221800 | -0.70237800 | -1.32619100 |
| H | -0.77262600 | -0.96389600 | -0.08468100 |
| H | -1.74408600 | -1.30416000 | -3.55476700 |
| H | -0.12915000 | -0.59399400 | -3.73570900 |
| H | -0.44873300 | -2.31224400 | -4.18210000 |
| C | 4.25300700  | -2.86742800 | -0.16727600 |
| C | 4.42741500  | -1.98198400 | 1.06666000  |
| C | 3.95444900  | -4.31196300 | 0.24435600  |
| C | 5.55344100  | -2.81199700 | -0.97591000 |
| H | 4.67747800  | -0.95843000 | 0.78583500  |
| H | 3.54846200  | -1.98081600 | 1.70823000  |
| H | 5.26463300  | -2.40043100 | 1.63245400  |
| H | 3.78801500  | -4.93992900 | -0.63563200 |
| H | 4.80973200  | -4.70981700 | 0.79702600  |
| H | 3.07338300  | -4.35244300 | 0.88806700  |
| H | 6.38155000  | -2.99497700 | -0.28839300 |
| H | 5.60188800  | -3.58085200 | -1.75024500 |
| H | 5.69346600  | -1.82440900 | -1.42390800 |
| C | 1.43028500  | -1.60214500 | 0.61471800  |
| C | 0.98001700  | -2.64927900 | 1.37356700  |
| C | 1.58671000  | -0.18498400 | 0.84111900  |
| H | 0.72979600  | -2.56108300 | 2.41976300  |
| H | 0.92145000  | -3.63599600 | 0.92706800  |
| H | -0.98496600 | -1.38176700 | 2.20727000  |
| C | 1.27201200  | 0.39921700  | 2.08871000  |
| O | 1.21891700  | 1.61521000  | 2.37171800  |
| O | 0.99024800  | -0.51537000 | 3.08498100  |
| C | 0.56070100  | 0.01167700  | 4.33712100  |
| C | 1.73986400  | 0.42867200  | 5.19880100  |
| H | 0.00077400  | -0.80072000 | 4.80945100  |
| H | -0.11658900 | 0.85274800  | 4.16907000  |
| H | 1.39343800  | 0.77389200  | 6.17705300  |
| H | 2.41793900  | -0.41532000 | 5.35092400  |
| H | 2.28552800  | 1.23833300  | 4.71091800  |
| C | 0.70603100  | 2.24767700  | -1.76292300 |
| O | 0.71752100  | 1.48985200  | -2.80205100 |
| C | -0.19940800 | 3.46147200  | -1.81502900 |
| C | -1.36541600 | 3.37114500  | -2.58652100 |
| C | 0.01194500  | 4.63276400  | -1.07292200 |
| C | -2.30972600 | 4.39601800  | -2.58900600 |
| H | -1.50895400 | 2.46995400  | -3.17528500 |
| C | -0.92536200 | 5.66422600  | -1.08025400 |
| H | 0.92299900  | 4.73787400  | -0.49055400 |
| C | -2.09622700 | 5.54740900  | -1.83121100 |
| H | -3.21266200 | 4.29926000  | -3.18539400 |
| H | -0.73820000 | 6.56611000  | -0.50447300 |

---

|    |             |             |             |
|----|-------------|-------------|-------------|
| H  | -2.82517100 | 6.35168000  | -1.83709400 |
| C  | 1.30018900  | 1.99342300  | -0.54715400 |
| C  | 2.07898000  | 0.72276500  | -0.30435900 |
| H  | 1.24756300  | 2.71279500  | 0.25942400  |
| H  | 1.94483800  | 0.18137900  | -1.24535300 |
| C  | 3.56825100  | 1.03519200  | -0.22377500 |
| C  | 4.40940700  | 0.75095700  | -1.30414500 |
| C  | 4.13442600  | 1.61556300  | 0.92063300  |
| C  | 5.77878300  | 1.01688700  | -1.24383600 |
| H  | 3.98406000  | 0.30029900  | -2.19998200 |
| C  | 5.49914600  | 1.87986600  | 0.98520700  |
| H  | 3.48505000  | 1.84500800  | 1.76129600  |
| C  | 6.33141700  | 1.57587300  | -0.09475700 |
| H  | 6.41354100  | 0.77779900  | -2.09278600 |
| H  | 5.92107300  | 2.32119000  | 1.88391300  |
| H  | 7.39660300  | 1.77714000  | -0.04001400 |
| C  | -2.76545300 | -1.10321500 | 1.50426300  |
| O  | -3.56633900 | -0.18197300 | 1.20696100  |
| O  | -2.85540700 | -2.32160100 | 1.25490900  |
| O  | -1.64450000 | -0.66778700 | 2.18331100  |
| Cs | -1.53806300 | 2.09244300  | 1.03036600  |
| Cs | -5.38454800 | -2.00472300 | -0.23845300 |

#### TS4<sub>Cs</sub>

|   |             |             |             |
|---|-------------|-------------|-------------|
| C | 1.59406200  | -2.66260900 | -2.96083600 |
| C | 2.81890000  | -2.95892900 | -2.47739100 |
| C | 1.66142200  | -1.99728500 | -0.85169600 |
| N | 0.87445700  | -2.06633300 | -1.94360100 |
| H | 1.18833200  | -2.82742100 | -3.94251800 |
| H | 3.65127000  | -3.42723500 | -2.97076400 |
| N | 2.86096500  | -2.54657900 | -1.15884000 |
| C | -0.60213400 | -1.77600000 | -2.09462100 |
| C | -1.34448500 | -3.07045000 | -1.75511100 |
| C | -1.04821100 | -0.64310600 | -1.18034300 |
| C | -0.85150400 | -1.34041300 | -3.54105500 |
| H | -0.93146400 | -3.91841500 | -2.30983500 |
| H | -1.30861600 | -3.25697400 | -0.67802700 |
| H | -2.39475400 | -2.95540600 | -2.03979500 |
| H | -0.50424700 | 0.26931400  | -1.43746700 |
| H | -2.11621600 | -0.48645900 | -1.37104400 |
| H | -0.93368400 | -0.89211000 | -0.12814600 |
| H | -1.89940600 | -1.04010300 | -3.61744700 |
| H | -0.22743100 | -0.47349700 | -3.77514100 |
| H | -0.69671500 | -2.14325000 | -4.26527500 |
| C | 3.98820500  | -2.99404300 | -0.24837600 |
| C | 4.20819300  | -2.08659700 | 0.96328700  |
| C | 3.63300400  | -4.41046000 | 0.21295700  |
| C | 5.28131100  | -3.00475600 | -1.07161900 |
| H | 4.42463100  | -1.06016000 | 0.66242500  |

---

|   |             |             |             |
|---|-------------|-------------|-------------|
| H | 3.36906400  | -2.09260800 | 1.65690700  |
| H | 5.08220200  | -2.48289600 | 1.48736200  |
| H | 3.47910000  | -5.07365100 | -0.64296600 |
| H | 4.45325800  | -4.80766600 | 0.81654900  |
| H | 2.72564900  | -4.39545300 | 0.82211800  |
| H | 6.11136700  | -3.20983400 | -0.39287600 |
| H | 5.29285900  | -3.78519000 | -1.83481900 |
| H | 5.45298000  | -2.03097400 | -1.53824200 |
| C | 1.34600600  | -1.44130000 | 0.49377900  |
| C | 0.71583100  | -2.40594900 | 1.39189900  |
| C | 1.63870100  | -0.11722100 | 0.67739200  |
| H | 1.18291000  | -2.49592900 | 2.37146700  |
| H | 0.57985400  | -3.38341000 | 0.92630200  |
| H | -0.44497400 | -1.75774300 | 1.75257700  |
| C | 1.51065200  | 0.46878500  | 2.02853700  |
| O | 1.19813900  | 1.62426200  | 2.28531000  |
| O | 1.82148900  | -0.39768400 | 3.00659900  |
| C | 1.69046100  | 0.06958000  | 4.35654700  |
| C | 2.91694600  | 0.85770500  | 4.77798100  |
| H | 1.57773400  | -0.83793800 | 4.95246200  |
| H | 0.78254700  | 0.67068800  | 4.44109800  |
| H | 2.83934400  | 1.13411100  | 5.83247000  |
| H | 3.81954000  | 0.25664200  | 4.64271700  |
| H | 3.00516600  | 1.76909300  | 4.18334400  |
| C | 0.63055500  | 2.33076800  | -1.80615600 |
| O | 0.61560200  | 1.59676400  | -2.85792800 |
| C | -0.29330200 | 3.53217400  | -1.79868700 |
| C | -1.46658100 | 3.45569700  | -2.55922400 |
| C | -0.07973700 | 4.68171600  | -1.02526200 |
| C | -2.41643300 | 4.47443900  | -2.52232300 |
| H | -1.61050500 | 2.57133200  | -3.17265000 |
| C | -1.02234900 | 5.70731600  | -0.99313900 |
| H | 0.83828200  | 4.77716300  | -0.45250300 |
| C | -2.20026700 | 5.60494400  | -1.73472700 |
| H | -3.32561200 | 4.38942600  | -3.11080700 |
| H | -0.83435900 | 6.59322600  | -0.39349100 |
| H | -2.93436100 | 6.40409800  | -1.70847400 |
| C | 1.28800300  | 2.06421100  | -0.62537800 |
| C | 2.09787200  | 0.80280000  | -0.46599400 |
| H | 1.24051000  | 2.75174900  | 0.20794300  |
| H | 1.92524100  | 0.26482800  | -1.40419800 |
| C | 3.59470500  | 1.07382900  | -0.39778500 |
| C | 4.43382100  | 0.64081400  | -1.42864000 |
| C | 4.17135400  | 1.74149700  | 0.69086200  |
| C | 5.81195500  | 0.85214700  | -1.37296300 |
| H | 3.99977300  | 0.11991600  | -2.28056800 |
| C | 5.54681800  | 1.94619000  | 0.75459800  |
| H | 3.53142500  | 2.10327200  | 1.49154000  |



---

|    |             |             |             |
|----|-------------|-------------|-------------|
| C  | 6.37505300  | 1.49856900  | -0.27577000 |
| H  | 6.44470200  | 0.50436500  | -2.18459600 |
| H  | 5.97605600  | 2.45836700  | 1.61069400  |
| H  | 7.44726900  | 1.65796600  | -0.22453000 |
| C  | -2.51981300 | -1.28864800 | 1.68291400  |
| O  | -3.43180100 | -0.39416100 | 1.70276900  |
| O  | -2.69520900 | -2.46589400 | 1.24865700  |
| O  | -1.31078400 | -0.93022300 | 2.12314700  |
| Cs | -1.66671800 | 1.96099000  | 1.09732300  |
| Cs | -5.32674200 | -1.91495000 | 0.00458500  |

**M4**

|   |             |             |             |
|---|-------------|-------------|-------------|
| C | 1.49648500  | 3.21859400  | -0.91400700 |
| C | 0.37092100  | 3.38519400  | -1.64098400 |
| C | -0.11111100 | 2.06788600  | 0.07354700  |
| N | 1.19044400  | 2.41322800  | 0.15753900  |
| H | 2.48251800  | 3.61668700  | -1.07640200 |
| H | 0.21653900  | 3.94854500  | -2.54296500 |
| N | -0.63645200 | 2.68554900  | -1.01097200 |
| C | 2.24553700  | 2.15460100  | 1.21328800  |
| C | 2.38596700  | 3.44622100  | 2.02383800  |
| C | 1.89110900  | 0.99173500  | 2.13646800  |
| C | 3.55392700  | 1.83500800  | 0.47493800  |
| H | 2.64500500  | 4.29323500  | 1.38282300  |
| H | 1.46323300  | 3.68227500  | 2.56067900  |
| H | 3.18582500  | 3.31535200  | 2.75751100  |
| H | 1.66806700  | 0.08359600  | 1.57035300  |
| H | 2.76780600  | 0.80859000  | 2.76307000  |
| H | 1.06354400  | 1.22974300  | 2.80513400  |
| H | 4.26217000  | 1.41082600  | 1.19036800  |
| H | 3.36472900  | 1.11616500  | -0.32677200 |
| H | 4.01590400  | 2.73486200  | 0.05983100  |
| C | -2.05632100 | 2.69367800  | -1.52975300 |
| C | -2.24864400 | 1.50192700  | -2.46493600 |
| C | -3.06186200 | 2.66942300  | -0.37831000 |
| C | -2.26494100 | 3.99756500  | -2.31076400 |
| H | -1.46960400 | 1.48330300  | -3.23254100 |
| H | -2.23372800 | 0.55801600  | -1.91999000 |
| H | -3.22024600 | 1.59324500  | -2.95781500 |
| H | -2.86378600 | 3.48009900  | 0.32872600  |
| H | -4.05592800 | 2.82493400  | -0.80333800 |
| H | -3.07312800 | 1.71732500  | 0.15190300  |
| H | -3.32438000 | 4.06788400  | -2.56398100 |
| H | -1.99522900 | 4.87107900  | -1.71154500 |
| H | -1.70909000 | 4.01496000  | -3.25037600 |
| C | -0.84568100 | 1.21190500  | 1.04323500  |
| C | -1.27622700 | 1.91366400  | 2.31816800  |
| C | -1.03804700 | -0.09195300 | 0.76968500  |
| H | -1.17520100 | 1.26452100  | 3.18984100  |

---

|   |             |             |             |
|---|-------------|-------------|-------------|
| H | -0.67339600 | 2.80965200  | 2.48362200  |
| C | -1.70891800 | -0.95592100 | 1.79925300  |
| O | -1.27943000 | -2.02657400 | 2.16393200  |
| O | -2.85652800 | -0.42246600 | 2.23858400  |
| C | -3.61512600 | -1.21698400 | 3.17472200  |
| C | -4.42201500 | -2.27168200 | 2.44292100  |
| H | -4.25662900 | -0.49870400 | 3.68628700  |
| H | -2.92608400 | -1.66381900 | 3.89380500  |
| H | -5.01359100 | -2.84706900 | 3.15911400  |
| H | -5.10222600 | -1.80524500 | 1.72582800  |
| H | -3.75973100 | -2.95459800 | 1.90614000  |
| C | 1.93803400  | -0.97064900 | -0.79114400 |
| O | 1.94732300  | -0.02800100 | -1.65779600 |
| C | 3.27929000  | -1.58911300 | -0.45174900 |
| C | 4.32016200  | -1.44971800 | -1.37602400 |
| C | 3.54717100  | -2.25654100 | 0.74988400  |
| C | 5.58155700  | -1.98289400 | -1.12739200 |
| H | 4.10848400  | -0.90201700 | -2.28833800 |
| C | 4.80970300  | -2.78594300 | 1.00692000  |
| H | 2.76741000  | -2.34414200 | 1.50083500  |
| C | 5.83192700  | -2.65660700 | 0.06715200  |
| H | 6.37272900  | -1.86946900 | -1.86306500 |
| H | 4.99953800  | -3.29302700 | 1.94848000  |
| H | 6.81598400  | -3.06869600 | 0.26865200  |
| C | 0.82000500  | -1.46537400 | -0.15247900 |
| C | -0.51584600 | -0.84420000 | -0.44791800 |
| H | 0.86279900  | -2.30380800 | 0.53133900  |
| H | -0.29254800 | -0.09905200 | -1.22391500 |
| C | -1.55097200 | -1.81653400 | -1.01719200 |
| C | -2.92810900 | -1.65146800 | -0.82667100 |
| C | -1.12349800 | -2.89007700 | -1.80527000 |
| C | -3.84680500 | -2.53504400 | -1.39300900 |
| H | -3.30074200 | -0.82494600 | -0.22466900 |
| C | -2.03653600 | -3.76752200 | -2.38259100 |
| H | -0.05629400 | -3.02972700 | -1.94926000 |
| C | -3.40476700 | -3.59768200 | -2.17490400 |
| H | -4.90869100 | -2.38805600 | -1.21924300 |
| H | -1.67901200 | -4.59245500 | -2.99167500 |
| H | -4.11712300 | -4.28777300 | -2.61569700 |
| H | -2.32297300 | 2.22361700  | 2.25996900  |

### TS5

|   |            |             |             |
|---|------------|-------------|-------------|
| C | 1.27792200 | -3.36777800 | -1.04461300 |
| C | 2.38632700 | -2.73602100 | -0.61381500 |
| C | 0.62999700 | -1.77623600 | 0.36321300  |
| N | 0.18881000 | -2.81992900 | -0.40101700 |
| H | 1.19619600 | -4.17614000 | -1.74650000 |
| H | 3.41301600 | -2.91763600 | -0.87310600 |
| N | 1.99581100 | -1.78351700 | 0.29730700  |

---

|   |             |             |             |
|---|-------------|-------------|-------------|
| C | -1.15143300 | -3.53938600 | -0.57634400 |
| C | -2.02022300 | -3.44055500 | 0.67645800  |
| C | -1.83975500 | -3.02411100 | -1.83962800 |
| C | -0.84840200 | -5.04090800 | -0.76064900 |
| H | -1.47424100 | -3.81963500 | 1.54651200  |
| H | -2.37211000 | -2.43069600 | 0.85284500  |
| H | -2.88696400 | -4.08823400 | 0.52212500  |
| H | -2.73237300 | -3.62993100 | -2.02102000 |
| H | -2.12387300 | -1.98021900 | -1.73368700 |
| H | -1.17496600 | -3.13910600 | -2.70167500 |
| H | -1.79765600 | -5.57437500 | -0.68605800 |
| H | -0.43084600 | -5.28097000 | -1.73996600 |
| H | -0.18299000 | -5.41697000 | 0.02094200  |
| C | 3.07212400  | -1.11792100 | 1.15805900  |
| C | 3.64539000  | 0.10655700  | 0.45081900  |
| C | 2.54463000  | -0.76755100 | 2.54617700  |
| C | 4.19475300  | -2.15330000 | 1.35866000  |
| H | 4.03549700  | -0.15848500 | -0.53607100 |
| H | 2.89198200  | 0.88605400  | 0.33487600  |
| H | 4.47455500  | 0.48951000  | 1.05325000  |
| H | 2.06284900  | -1.63479000 | 3.00770200  |
| H | 3.40597300  | -0.49796000 | 3.16284700  |
| H | 1.86336800  | 0.07854900  | 2.53462400  |
| H | 4.88500100  | -1.75051500 | 2.10208400  |
| H | 3.80132100  | -3.10199400 | 1.73350000  |
| H | 4.77737000  | -2.33496100 | 0.45404500  |
| C | -0.10998600 | -0.57499100 | 0.96719900  |
| C | -0.70548200 | -0.77206900 | 2.34861400  |
| C | 0.42588000  | 0.64559400  | 0.49791500  |
| H | -1.46261200 | -0.00588900 | 2.51694200  |
| H | -1.17101700 | -1.75351700 | 2.41844400  |
| C | 0.41505700  | 1.87845700  | 1.23107300  |
| O | 0.56497700  | 3.00394200  | 0.75923700  |
| O | 0.32443200  | 1.72251400  | 2.59325200  |
| C | 0.55411900  | 2.89505600  | 3.37684100  |
| C | 2.04098600  | 3.17140600  | 3.51493900  |
| H | 0.10075300  | 2.68051500  | 4.34739700  |
| H | 0.03994100  | 3.74413200  | 2.92177100  |
| H | 2.21005900  | 4.04873900  | 4.14511900  |
| H | 2.54841800  | 2.31599200  | 3.96928100  |
| H | 2.47551700  | 3.35899800  | 2.53056900  |
| C | -2.04566000 | 0.40972700  | -0.57266400 |
| O | -1.67890600 | -0.73431400 | -0.02112700 |
| C | -3.46693300 | 0.81058300  | -0.38861000 |
| C | -4.09938400 | 1.69659800  | -1.27033900 |
| C | -4.20837300 | 0.28280500  | 0.67503900  |
| C | -5.42614300 | 2.06713500  | -1.07596300 |
| H | -3.55045500 | 2.08211100  | -2.12485100 |

---

|   |             |             |             |
|---|-------------|-------------|-------------|
| C | -5.53534300 | 0.65480500  | 0.87051900  |
| H | -3.72450800 | -0.41806400 | 1.34861100  |
| C | -6.15067500 | 1.55043000  | -0.00249700 |
| H | -5.89953800 | 2.75360800  | -1.77147800 |
| H | -6.09251300 | 0.24225500  | 1.70651100  |
| H | -7.18717100 | 1.83580000  | 0.14647800  |
| C | -1.12040300 | 1.19967300  | -1.17941500 |
| C | 0.30695400  | 0.75307500  | -1.04862300 |
| H | -1.36674100 | 2.19819500  | -1.52392200 |
| H | 0.36168400  | -0.27944800 | -1.41906200 |
| C | 1.33356400  | 1.51789800  | -1.86154800 |
| C | 1.30495600  | 2.90476400  | -2.04355400 |
| C | 2.32426900  | 0.79076600  | -2.53127700 |
| C | 2.24817600  | 3.53871500  | -2.84930800 |
| H | 0.55207800  | 3.48781300  | -1.52758900 |
| C | 3.27557200  | 1.41908100  | -3.33115300 |
| H | 2.34702600  | -0.29233500 | -2.41957500 |
| C | 3.24045200  | 2.80176100  | -3.49318500 |
| H | 2.20682000  | 4.61664200  | -2.97553200 |
| H | 4.03486600  | 0.82843300  | -3.83487100 |
| H | 3.97423100  | 3.29953800  | -4.11950900 |
| H | 0.03808300  | -0.68237400 | 3.13903300  |

**M5**

|   |             |            |             |
|---|-------------|------------|-------------|
| C | 1.01315600  | 2.68297700 | -2.09720600 |
| C | -0.32856300 | 2.70612400 | -2.18148700 |
| C | 0.20712000  | 1.80938400 | -0.21339000 |
| N | 1.35349800  | 2.19417400 | -0.85250000 |
| H | 1.74371300  | 2.99991100 | -2.81905300 |
| H | -0.95238900 | 3.04941300 | -2.98585000 |
| N | -0.83456000 | 2.21936200 | -0.99690400 |
| C | 2.80395600  | 2.44182600 | -0.42150400 |
| C | 3.01368000  | 2.44380900 | 1.08990000  |
| C | 3.70344800  | 1.42634200 | -1.11741400 |
| C | 3.16645200  | 3.86532400 | -0.89485600 |
| H | 2.38731600  | 3.20493000 | 1.56367000  |
| H | 2.84195900  | 1.47439300 | 1.54462600  |
| H | 4.05566800  | 2.72465800 | 1.26175200  |
| H | 3.52067300  | 1.41075800 | -2.19572200 |
| H | 4.74585600  | 1.71346200 | -0.95438200 |
| H | 3.55615600  | 0.42560400 | -0.71767800 |
| H | 4.12545800  | 4.13045700 | -0.44546300 |
| H | 3.28877200  | 3.94504400 | -1.97565200 |
| H | 2.41878200  | 4.59047500 | -0.56309900 |
| C | -2.32745200 | 2.40869000 | -0.73276500 |
| C | -3.14018800 | 1.25796200 | -1.32617200 |
| C | -2.59438900 | 2.61578200 | 0.75268400  |
| C | -2.74705800 | 3.71528800 | -1.43595600 |
| H | -2.85631000 | 1.09744600 | -2.37157200 |

---

|   |             |             |             |
|---|-------------|-------------|-------------|
| H | -3.03321000 | 0.32803400  | -0.76728000 |
| H | -4.19429800 | 1.55243600  | -1.31296600 |
| H | -2.00304600 | 3.45434600  | 1.13444600  |
| H | -3.65152300 | 2.86959700  | 0.86793500  |
| H | -2.40279300 | 1.72579900  | 1.34220500  |
| H | -3.74927100 | 3.96762800  | -1.08427900 |
| H | -2.07701800 | 4.54129100  | -1.18328400 |
| H | -2.80862800 | 3.61699500  | -2.52158300 |
| C | 0.08722500  | 0.71345200  | 0.93816500  |
| C | 0.06475500  | 1.35964800  | 2.32686000  |
| C | -0.98512700 | -0.25799400 | 0.55838900  |
| H | 0.08901800  | 0.56639000  | 3.07147400  |
| H | 0.94781500  | 1.98419100  | 2.44023500  |
| C | -2.11388700 | -0.60370600 | 1.31056500  |
| O | -3.10014400 | -1.26519300 | 0.93406100  |
| O | -2.13300000 | -0.11589400 | 2.62137700  |
| C | -3.32395200 | -0.36236600 | 3.35952300  |
| C | -4.42479900 | 0.63001700  | 3.02246500  |
| H | -3.03204500 | -0.27108300 | 4.41001200  |
| H | -3.66533400 | -1.38336500 | 3.17587700  |
| H | -5.32074800 | 0.42151200  | 3.61464100  |
| H | -4.10272300 | 1.65399300  | 3.23325900  |
| H | -4.67766000 | 0.55146500  | 1.96228100  |
| C | 1.61972100  | -0.98023800 | 0.09575200  |
| O | 1.39773700  | 0.06601900  | 0.94193200  |
| C | 2.94182600  | -1.61006700 | 0.33333400  |
| C | 3.58906000  | -2.34864000 | -0.66607500 |
| C | 3.56500800  | -1.47149100 | 1.57934700  |
| C | 4.81789000  | -2.94856600 | -0.41700200 |
| H | 3.14008900  | -2.43420600 | -1.65072100 |
| C | 4.79572900  | -2.07467100 | 1.82596500  |
| H | 3.07228700  | -0.89613700 | 2.35570500  |
| C | 5.42665400  | -2.81637700 | 0.83099300  |
| H | 5.30832200  | -3.51186700 | -1.20449200 |
| H | 5.26150000  | -1.96267900 | 2.80001300  |
| H | 6.38824800  | -3.28191300 | 1.02096400  |
| C | 0.72189200  | -1.40347800 | -0.79810300 |
| C | -0.71764500 | -0.92516000 | -0.79294300 |
| H | 0.98569200  | -2.23426400 | -1.44369800 |
| H | -0.86261500 | -0.21784700 | -1.63113700 |
| C | -1.55932800 | -2.14519600 | -1.14149000 |
| C | -1.48240200 | -3.31075300 | -0.37030300 |
| C | -2.32479900 | -2.16978900 | -2.30485900 |
| C | -2.17554300 | -4.45579600 | -0.73733900 |
| H | -0.87577700 | -3.29890800 | 0.53173700  |
| C | -3.02600600 | -3.31832900 | -2.68027800 |
| H | -2.37531900 | -1.27919400 | -2.92653700 |
| C | -2.95592300 | -4.46446600 | -1.89726200 |

---

|   |             |             |             |
|---|-------------|-------------|-------------|
| H | -2.11096800 | -5.34850900 | -0.12201000 |
| H | -3.62063000 | -3.31424800 | -3.58900100 |
| H | -3.49733500 | -5.36006100 | -2.18575400 |
| H | -0.82006400 | 1.96260000  | 2.50203400  |

**TS6**

|   |             |             |             |
|---|-------------|-------------|-------------|
| C | -1.97940900 | -1.81117900 | -1.87321800 |
| C | -0.73307500 | -2.06899900 | -2.31503900 |
| C | -0.59705500 | -1.70407200 | -0.09663500 |
| N | -1.90662600 | -1.63589200 | -0.50102200 |
| H | -2.90765600 | -1.78249000 | -2.41900700 |
| H | -0.38162800 | -2.27780300 | -3.31150900 |
| N | 0.10256000  | -2.05667200 | -1.21303400 |
| C | -3.14184100 | -1.98559200 | 0.29898500  |
| C | -2.92963900 | -1.84836900 | 1.79803000  |
| C | -4.33340900 | -1.13188300 | -0.13647300 |
| C | -3.42115100 | -3.46749900 | -0.00822100 |
| H | -2.13226900 | -2.51425700 | 2.13590500  |
| H | -2.70342800 | -0.82251900 | 2.08434600  |
| H | -3.85545800 | -2.15708900 | 2.29052600  |
| H | -4.50595400 | -1.16927700 | -1.21463100 |
| H | -5.22787300 | -1.53106700 | 0.34955600  |
| H | -4.21264000 | -0.09190700 | 0.16539300  |
| H | -4.25830600 | -3.81290700 | 0.60400100  |
| H | -3.67951700 | -3.62106000 | -1.05882100 |
| H | -2.54108900 | -4.07365800 | 0.22797800  |
| C | 1.43648200  | -2.75245100 | -1.28499800 |
| C | 2.48526000  | -1.88623900 | -1.98035400 |
| C | 1.86882400  | -3.18153400 | 0.11226900  |
| C | 1.22352300  | -4.03773600 | -2.10567500 |
| H | 2.10041000  | -1.51525700 | -2.93632600 |
| H | 2.80358300  | -1.04295300 | -1.36750900 |
| H | 3.36112800  | -2.50677900 | -2.19348300 |
| H | 1.11508000  | -3.83638200 | 0.56052300  |
| H | 2.80311800  | -3.74269000 | 0.02347900  |
| H | 2.04954500  | -2.33626400 | 0.76984800  |
| H | 2.12756500  | -4.64633100 | -2.02719200 |
| H | 0.38044800  | -4.61448700 | -1.71469200 |
| H | 1.05582000  | -3.83683600 | -3.16591600 |
| C | 0.15785500  | -0.44388200 | 1.12635300  |
| C | 0.28090900  | -1.10111300 | 2.48498300  |
| C | 1.30200100  | 0.16871800  | 0.50394900  |
| H | 0.79052000  | -0.41358300 | 3.16048700  |
| H | -0.71225700 | -1.30481300 | 2.87392000  |
| C | 2.66404700  | -0.01878500 | 0.86793800  |
| O | 3.62772300  | 0.38317100  | 0.20383100  |
| O | 2.89914400  | -0.66971300 | 2.05915400  |
| C | 4.26998200  | -0.87441600 | 2.40227200  |
| C | 4.85132900  | -2.08402000 | 1.69166400  |

---

|   |              |              |              |
|---|--------------|--------------|--------------|
| H | 4. 26996000  | -1. 02168200 | 3. 48522400  |
| H | 4. 84195300  | 0. 02506300  | 2. 16636000  |
| H | 5. 89831500  | -2. 22301800 | 1. 97528000  |
| H | 4. 29842700  | -2. 98910200 | 1. 95682200  |
| H | 4. 79609900  | -1. 94125300 | 0. 60945500  |
| C | -1. 24370300 | 1. 22152700  | 0. 14574900  |
| O | -0. 98478100 | 0. 38822400  | 1. 20496000  |
| C | -2. 59808400 | 1. 80681800  | 0. 21812700  |
| C | -3. 28809800 | 2. 16717000  | -0. 94525400 |
| C | -3. 21839500 | 1. 98656400  | 1. 46028500  |
| C | -4. 57286600 | 2. 69293800  | -0. 86724700 |
| H | -2. 83139600 | 1. 99788800  | -1. 91555500 |
| C | -4. 50517800 | 2. 51267400  | 1. 53512000  |
| H | -2. 68791800 | 1. 70550300  | 2. 36419000  |
| C | -5. 18809500 | 2. 86394800  | 0. 37269100  |
| H | -5. 10268700 | 2. 95454100  | -1. 77754600 |
| H | -4. 97571600 | 2. 64573100  | 2. 50409700  |
| H | -6. 19461900 | 3. 26506000  | 0. 43158200  |
| C | -0. 35336500 | 1. 46326200  | -0. 81688100 |
| C | 1. 08450800  | 1. 02876400  | -0. 72689200 |
| H | -0. 62748800 | 2. 13499100  | -1. 62351800 |
| H | 1. 35219200  | 0. 49308000  | -1. 65395000 |
| C | 1. 88926500  | 2. 32984900  | -0. 73586500 |
| C | 1. 94118500  | 3. 14441600  | 0. 39843800  |
| C | 2. 49633600  | 2. 77826500  | -1. 90795700 |
| C | 2. 60544200  | 4. 36584300  | 0. 36760600  |
| H | 1. 46225100  | 2. 79729400  | 1. 31104000  |
| C | 3. 16012400  | 4. 00432500  | -1. 94644600 |
| H | 2. 45949300  | 2. 15377000  | -2. 79787600 |
| C | 3. 21913200  | 4. 80264900  | -0. 80741900 |
| H | 2. 64284800  | 4. 98268300  | 1. 26081000  |
| H | 3. 63324400  | 4. 33353900  | -2. 86698000 |
| H | 3. 73743200  | 5. 75608400  | -0. 83294000 |
| H | 0. 85318600  | -2. 02503100 | 2. 44215100  |

**P**

|   |              |              |              |
|---|--------------|--------------|--------------|
| C | 0. 16414100  | -1. 52206900 | 0. 47479100  |
| C | 0. 48693900  | -2. 75909500 | 1. 26215200  |
| C | 1. 00254100  | -0. 69442900 | -0. 18604700 |
| H | 1. 14891000  | -2. 52592400 | 2. 09700700  |
| H | -0. 44369000 | -3. 18346000 | 1. 63828900  |
| C | 2. 45695200  | -0. 91806400 | -0. 30158900 |
| O | 3. 16391500  | -0. 23276100 | -1. 01684200 |
| O | 2. 93610000  | -1. 92845100 | 0. 44025700  |
| C | 4. 34490200  | -2. 19805300 | 0. 31909400  |
| C | 4. 63891700  | -3. 00715600 | -0. 92935600 |
| H | 4. 59448600  | -2. 75388700 | 1. 22378700  |
| H | 4. 88604000  | -1. 24972600 | 0. 31649200  |
| H | 5. 70204900  | -3. 25713000 | -0. 96624700 |

---

|   |             |             |             |
|---|-------------|-------------|-------------|
| H | 4.06438600  | -3.93646000 | -0.92534800 |
| H | 4.38448600  | -2.43439600 | -1.82305900 |
| C | -1.73513500 | -0.30536500 | -0.27031400 |
| O | -1.18145700 | -1.31789800 | 0.48908600  |
| C | -3.21219300 | -0.33516300 | -0.21557300 |
| C | -3.97835100 | 0.27277800  | -1.21757400 |
| C | -3.86470400 | -0.97203500 | 0.84637100  |
| C | -5.36638600 | 0.26277500  | -1.14603300 |
| H | -3.48923700 | 0.73792100  | -2.06731900 |
| C | -5.25499600 | -0.98257600 | 0.91252100  |
| H | -3.27953600 | -1.45406000 | 1.62143400  |
| C | -6.01057700 | -0.36352400 | -0.07968000 |
| H | -5.94640000 | 0.73543000  | -1.93199600 |
| H | -5.74808600 | -1.47644300 | 1.74354400  |
| H | -7.09432900 | -0.37470100 | -0.02793600 |
| C | -0.98194500 | 0.56826000  | -0.93885100 |
| C | 0.51981600  | 0.55286700  | -0.89983800 |
| H | -1.46619200 | 1.36383100  | -1.49343700 |
| H | 0.91619000  | 0.54478100  | -1.92295000 |
| C | 1.04180200  | 1.82307500  | -0.23330700 |
| C | 0.75354500  | 2.07654900  | 1.10961200  |
| C | 1.78705500  | 2.75573400  | -0.95342300 |
| C | 1.20692400  | 3.24055600  | 1.72378500  |
| H | 0.16939500  | 1.35262600  | 1.67395400  |
| C | 2.23865600  | 3.92482100  | -0.34426300 |
| H | 2.02127200  | 2.55765900  | -1.99602300 |
| C | 1.95057900  | 4.16917400  | 0.99664300  |
| H | 0.97868800  | 3.42553900  | 2.76886300  |
| H | 2.81922100  | 4.64230900  | -0.91581300 |
| H | 2.30406400  | 5.07802600  | 1.47319100  |
| H | 0.99892000  | -3.49341700 | 0.63883300  |

**PMe<sub>3</sub>**

|   |             |             |             |
|---|-------------|-------------|-------------|
| P | 0.00007500  | 0.00004000  | 0.60581600  |
| C | -0.65461700 | 1.49013400  | -0.27966000 |
| H | -1.69576900 | 1.65958600  | 0.00669600  |
| H | -0.07680000 | 2.37217400  | 0.00818800  |
| H | -0.59992000 | 1.36808300  | -1.36609900 |
| C | -0.96340600 | -1.31192500 | -0.27960900 |
| H | -0.59102000 | -2.29857100 | 0.00776800  |
| H | -2.01637700 | -1.25105200 | 0.00722900  |
| H | -0.88396800 | -1.20440200 | -1.36605500 |
| C | 1.61795400  | -0.17827000 | -0.27969700 |
| H | 2.28567700  | 0.63825200  | 0.00694200  |
| H | 2.09242500  | -1.11996300 | 0.00805200  |
| H | 1.48503500  | -0.16433600 | -1.36616400 |

**R1**

|   |             |             |             |
|---|-------------|-------------|-------------|
| C | -2.50087000 | -0.40341000 | -0.00000400 |
|---|-------------|-------------|-------------|



---

|   |             |             |             |
|---|-------------|-------------|-------------|
| C | -3.74039200 | -0.01095300 | -0.00009400 |
| C | -1.24999400 | -0.79841100 | 0.00006300  |
| H | -4.26975400 | 0.16218800  | 0.93180600  |
| H | -4.26966200 | 0.16205000  | -0.93207100 |
| H | -0.98869100 | -1.85172900 | 0.00009200  |
| C | -0.14433000 | 0.19328900  | 0.00001600  |
| O | -0.26880900 | 1.39530400  | -0.00001400 |
| O | 1.04327900  | -0.43288700 | 0.00002000  |
| C | 2.19237400  | 0.42894900  | -0.00001000 |
| C | 3.41808900  | -0.45729300 | 0.00003800  |
| H | 2.14940800  | 1.07307900  | 0.88305900  |
| H | 2.14942200  | 1.07299900  | -0.88313800 |
| H | 4.32049700  | 0.15809100  | 0.00002100  |
| H | 3.43186600  | -1.09448600 | 0.88696600  |
| H | 3.43188300  | -1.09455700 | -0.88684000 |

**R2**

|   |             |             |             |
|---|-------------|-------------|-------------|
| C | 1.18071900  | -0.96233900 | -0.03782900 |
| O | 1.17337800  | -2.18231700 | -0.09516400 |
| C | 2.48461500  | -0.22220200 | -0.02002000 |
| C | 2.59062300  | 1.14006800  | -0.31456400 |
| C | 3.63955600  | -0.95151600 | 0.28127600  |
| C | 3.83513400  | 1.76353200  | -0.30187600 |
| H | 1.71219900  | 1.71779100  | -0.58197600 |
| C | 4.87877000  | -0.32628400 | 0.30704300  |
| H | 3.53755200  | -2.01044100 | 0.49384100  |
| C | 4.97785500  | 1.03414600  | 0.01553400  |
| H | 3.91193900  | 2.81900600  | -0.54147200 |
| H | 5.76902900  | -0.89595400 | 0.55264500  |
| H | 5.94615200  | 1.52438100  | 0.03265000  |
| C | -0.08294800 | -0.18531000 | 0.03739500  |
| C | -1.25723500 | -0.82046700 | -0.09087500 |
| H | -0.02915000 | 0.88110400  | 0.22443200  |
| H | -1.21079000 | -1.89566400 | -0.26103500 |
| C | -2.59826200 | -0.23230300 | -0.02412100 |
| C | -3.70724600 | -1.07520900 | -0.17103600 |
| C | -2.81913400 | 1.13750300  | 0.18358300  |
| C | -5.00168600 | -0.56957900 | -0.11132100 |
| H | -3.54510100 | -2.13743000 | -0.33211200 |
| C | -4.11019000 | 1.64287900  | 0.24291800  |
| H | -1.97739300 | 1.81314600  | 0.29822700  |
| C | -5.20595400 | 0.79136800  | 0.09627000  |
| H | -5.84874900 | -1.23797700 | -0.22586500 |
| H | -4.26634900 | 2.70460200  | 0.40398900  |

---

|                        |             |             |             |
|------------------------|-------------|-------------|-------------|
| H                      | -6.21406300 | 1.19025200  | 0.14371500  |
| <b>TS1<sub>p</sub></b> |             |             |             |
| C                      | -0.76500400 | 1.72852100  | -0.12210600 |
| C                      | -1.64572000 | 2.62631800  | 0.27424400  |
| C                      | 0.48851500  | 1.44416000  | -0.56072900 |
| H                      | -1.29349100 | 3.63333000  | 0.48602100  |
| H                      | -2.69930400 | 2.41379700  | 0.40394600  |
| H                      | 0.80203100  | 1.72062500  | -1.56091300 |
| C                      | 1.31627900  | 0.55685900  | 0.21743700  |
| O                      | 0.98360500  | -0.00340100 | 1.25711500  |
| O                      | 2.53149000  | 0.35248800  | -0.34548300 |
| C                      | 3.39416500  | -0.55204600 | 0.35240300  |
| C                      | 4.68483100  | -0.64083200 | -0.43236500 |
| H                      | 2.90291100  | -1.52696500 | 0.43535700  |
| H                      | 3.56104700  | -0.17911700 | 1.36769400  |
| H                      | 5.37854400  | -1.32075400 | 0.06735800  |
| H                      | 4.49697300  | -1.01730000 | -1.44066300 |
| H                      | 5.15683500  | 0.34138600  | -0.50977600 |
| P                      | -2.00042900 | -0.38443600 | -0.06423300 |
| C                      | -2.14235000 | -1.34648700 | 1.49676400  |
| H                      | -1.15503900 | -1.37731600 | 1.96152100  |
| H                      | -2.83670500 | -0.84441500 | 2.17457700  |
| H                      | -2.49929000 | -2.36301200 | 1.30545000  |
| C                      | -0.94818900 | -1.46778100 | -1.10386500 |
| H                      | -0.76729600 | -0.98579500 | -2.06787200 |
| H                      | 0.01038200  | -1.61729500 | -0.60194600 |
| H                      | -1.42490700 | -2.43815800 | -1.26474200 |
| C                      | -3.66923200 | -0.60602100 | -0.81722800 |
| H                      | -4.40906300 | -0.05826600 | -0.22857900 |
| H                      | -3.66574600 | -0.20041800 | -1.83155700 |
| H                      | -3.95199100 | -1.66262700 | -0.85276400 |
| <b>M1<sub>p</sub></b>  |             |             |             |
| C                      | 0.83408200  | 0.70132800  | -0.00145100 |
| C                      | 1.03208700  | 2.04858800  | -0.00402300 |
| C                      | -0.35887600 | -0.08240400 | 0.00033200  |
| H                      | 0.17836000  | 2.71273400  | -0.00523000 |
| H                      | 2.02346100  | 2.48329500  | -0.00503800 |
| H                      | -0.30655600 | -1.16458900 | 0.00147100  |
| C                      | -1.63732400 | 0.50543700  | 0.00120800  |
| O                      | -1.92909500 | 1.70912200  | 0.00098600  |
| O                      | -2.64647400 | -0.44308500 | 0.00239700  |
| C                      | -3.97140000 | 0.07198800  | 0.00425200  |
| C                      | -4.91773600 | -1.11156500 | -0.00542700 |
| H                      | -4.12616000 | 0.71116600  | -0.87239500 |
| H                      | -4.12883200 | 0.69837300  | 0.88980400  |
| H                      | -5.95498800 | -0.76794400 | -0.00374200 |
| H                      | -4.75708300 | -1.72403600 | -0.89633000 |

---

|   |             |             |             |
|---|-------------|-------------|-------------|
| H | -4.75874900 | -1.73771200 | 0.87622800  |
| P | 2.32418700  | -0.31512000 | 0.00004800  |
| C | 2.34346900  | -1.37557700 | -1.46605300 |
| H | 1.44345500  | -1.99201300 | -1.47802600 |
| H | 2.35800800  | -0.74288900 | -2.35562200 |
| H | 3.22808600  | -2.01505500 | -1.45285000 |
| C | 2.34350000  | -1.37088300 | 1.46953300  |
| H | 2.35916800  | -0.73542900 | 2.35711700  |
| H | 1.44286500  | -1.98635800 | 1.48391700  |
| H | 3.22751500  | -2.01120500 | 1.45776000  |
| C | 3.84239300  | 0.66434200  | -0.00157700 |
| H | 3.87924600  | 1.28912400  | -0.89532100 |
| H | 3.87882100  | 1.29259300  | 0.88975000  |
| H | 4.69397200  | -0.01907100 | -0.00004400 |

**TS2<sub>p</sub>**

|   |             |             |             |
|---|-------------|-------------|-------------|
| C | 0.27450100  | 1.51437000  | 0.50748700  |
| C | 0.93826100  | 0.79076100  | 1.44147900  |
| C | -1.04314900 | 1.26738800  | -0.02422000 |
| H | 0.43471000  | 0.00768200  | 1.99093300  |
| H | 1.96653500  | 1.00727400  | 1.71016600  |
| H | -1.40079400 | 1.94565400  | -0.79435500 |
| C | -2.16935300 | 0.83041700  | 0.79380900  |
| O | -3.33555800 | 1.10090000  | 0.55246300  |
| O | -1.81842100 | 0.02566300  | 1.82373500  |
| C | -2.89201500 | -0.46316300 | 2.63976500  |
| C | -3.32190700 | 0.57582000  | 3.65848600  |
| H | -2.48674500 | -1.35295200 | 3.12655500  |
| H | -3.72246500 | -0.75656600 | 1.99340500  |
| H | -4.09452200 | 0.16376500  | 4.31267400  |
| H | -2.47263100 | 0.88046600  | 4.27511300  |
| H | -3.72580800 | 1.45457300  | 3.15200200  |
| C | 1.68448500  | -0.80261200 | -0.86707600 |
| O | 1.95469800  | 0.12682900  | -1.66989600 |
| C | 2.84390200  | -1.51077900 | -0.20976500 |
| C | 4.10834200  | -1.37845300 | -0.79212200 |
| C | 2.71701300  | -2.27491900 | 0.95593300  |
| C | 5.21898500  | -2.00783800 | -0.23764700 |
| H | 4.19574500  | -0.77302000 | -1.68847700 |
| C | 3.82698700  | -2.90089200 | 1.51555400  |
| H | 1.75217100  | -2.36092100 | 1.44570800  |
| C | 5.08078700  | -2.77339800 | 0.91833100  |
| H | 6.19282100  | -1.90058400 | -0.70558500 |
| H | 3.71578100  | -3.48359000 | 2.42482600  |
| H | 5.94490400  | -3.26272600 | 1.35665300  |
| C | 0.35964200  | -1.23103900 | -0.59197900 |
| C | -0.70765300 | -0.54408300 | -1.17992100 |
| H | 0.18836400  | -2.06807900 | 0.07318900  |
| H | -0.43223400 | 0.08093100  | -2.02635700 |

---

|   |             |             |             |
|---|-------------|-------------|-------------|
| C | -2.07246100 | -1.11151700 | -1.26763000 |
| C | -2.93231500 | -0.67516600 | -2.28277600 |
| C | -2.54747000 | -2.06899000 | -0.36129200 |
| C | -4.21959600 | -1.18863000 | -2.40474000 |
| H | -2.57879200 | 0.07585200  | -2.98525900 |
| C | -3.83545700 | -2.58245300 | -0.47941900 |
| H | -1.90868900 | -2.40534900 | 0.44975500  |
| C | -4.67662200 | -2.14748400 | -1.50288300 |
| H | -4.86640900 | -0.84089800 | -3.20429800 |
| H | -4.18510100 | -3.32501900 | 0.23162600  |
| H | -5.67969400 | -2.55143700 | -1.59500600 |
| P | 1.18901300  | 2.83781000  | -0.30283300 |
| C | 0.81430700  | 2.95185700  | -2.06754800 |
| C | 2.97168500  | 2.63407300  | -0.10475800 |
| C | 0.72034600  | 4.42039300  | 0.44567400  |
| H | 1.04648700  | 1.98481800  | -2.51522200 |
| H | -0.23524300 | 3.20931200  | -2.21782300 |
| H | 1.43680500  | 3.73780800  | -2.50105200 |
| H | 3.24709500  | 2.70235700  | 0.94879400  |
| H | 3.23707200  | 1.65783500  | -0.51756000 |
| H | 3.47359000  | 3.43246500  | -0.65576100 |
| H | -0.35806700 | 4.55822400  | 0.34291800  |
| H | 0.98330700  | 4.40911800  | 1.50501500  |
| H | 1.24340200  | 5.23675000  | -0.05693300 |

**M2<sub>p</sub>**

|   |             |             |             |
|---|-------------|-------------|-------------|
| C | 0.08660300  | 1.61757000  | 0.70137300  |
| C | 0.78727700  | 1.17710700  | 1.75040100  |
| C | -1.13426400 | 0.94136600  | 0.12746900  |
| H | 0.46388700  | 0.30740200  | 2.30927200  |
| H | 1.70046700  | 1.66375300  | 2.07829400  |
| H | -1.76596300 | 1.67523700  | -0.38542600 |
| C | -2.05432000 | 0.36522400  | 1.18593800  |
| O | -3.17579300 | 0.77302100  | 1.39190400  |
| O | -1.51812400 | -0.67653900 | 1.83238800  |
| C | -2.36683600 | -1.34316800 | 2.78724500  |
| C | -2.39920100 | -0.59366400 | 4.10476200  |
| H | -1.92276800 | -2.33329400 | 2.89943100  |
| H | -3.36447800 | -1.44255100 | 2.35317600  |
| H | -2.99512700 | -1.15014800 | 4.83209800  |
| H | -1.38815700 | -0.47812600 | 4.50284800  |
| H | -2.84509000 | 0.39349800  | 3.97102800  |
| C | 1.68487200  | -0.52005600 | -0.79532200 |
| O | 1.92124200  | 0.60823900  | -1.37513300 |
| C | 2.88721500  | -1.33166900 | -0.37930300 |
| C | 4.10214200  | -1.11474000 | -1.03828000 |
| C | 2.85373400  | -2.27562500 | 0.65496100  |
| C | 5.24223400  | -1.83923800 | -0.70080000 |
| H | 4.12650000  | -0.36185100 | -1.81942800 |

---

|   |             |             |             |
|---|-------------|-------------|-------------|
| C | 3.99260600  | -2.99877300 | 0.99962100  |
| H | 1.93260400  | -2.42459200 | 1.21067600  |
| C | 5.19180800  | -2.78773200 | 0.31957100  |
| H | 6.17352700  | -1.66242300 | -1.23110400 |
| H | 3.94791600  | -3.72146400 | 1.80905300  |
| H | 6.08011800  | -3.35004000 | 0.58996700  |
| C | 0.42689800  | -1.01716600 | -0.55459400 |
| C | -0.73767500 | -0.17758000 | -0.95010300 |
| H | 0.27985700  | -1.98284200 | -0.08941300 |
| H | -0.41957500 | 0.41425000  | -1.81591800 |
| C | -2.00602400 | -0.91520800 | -1.34189700 |
| C | -2.84472500 | -0.36561900 | -2.31750700 |
| C | -2.40237600 | -2.10796900 | -0.72653700 |
| C | -4.04017900 | -0.98459100 | -2.67450200 |
| H | -2.54967500 | 0.55954100  | -2.80815900 |
| C | -3.59848600 | -2.73023400 | -1.07872400 |
| H | -1.77311000 | -2.55267200 | 0.03769200  |
| C | -4.42223800 | -2.17184300 | -2.05371800 |
| H | -4.67056300 | -0.54147100 | -3.43915100 |
| H | -3.88556200 | -3.65655900 | -0.59057400 |
| H | -5.35227900 | -2.65871300 | -2.32889500 |
| P | 0.69868600  | 3.07513500  | -0.16635800 |
| C | 0.28408900  | 3.06901500  | -1.92215200 |
| C | 2.48306000  | 3.23793100  | 0.02557300  |
| C | -0.08794500 | 4.53714100  | 0.56207100  |
| H | 0.79772000  | 2.21483100  | -2.36612300 |
| H | -0.79704100 | 2.99297300  | -2.05599000 |
| H | 0.62790200  | 4.01226600  | -2.35277200 |
| H | 2.74064700  | 3.42185400  | 1.06957600  |
| H | 2.91048800  | 2.30104900  | -0.34053800 |
| H | 2.81876900  | 4.08461400  | -0.57732900 |
| H | -1.17255700 | 4.45452600  | 0.46636900  |
| H | 0.17810900  | 4.59954500  | 1.61883000  |
| H | 0.25493500  | 5.43373500  | 0.04132800  |

**TS2'p**

|   |             |             |            |
|---|-------------|-------------|------------|
| C | 0.19311900  | 1.53881500  | 1.07271000 |
| C | 1.56185200  | 1.43299800  | 0.82011600 |
| C | -0.65620800 | 0.48128900  | 1.39004200 |
| H | 2.10744500  | 0.63675400  | 1.30660500 |
| H | 2.13923200  | 2.31337500  | 0.55034800 |
| H | -1.73131200 | 0.61587900  | 1.40844800 |
| C | -0.18373800 | -0.76806300 | 1.94350800 |
| O | 0.97521700  | -1.09660900 | 2.17346500 |
| O | -1.22321400 | -1.59855800 | 2.24713200 |
| C | -0.87495400 | -2.83597600 | 2.87656400 |
| C | -0.43507900 | -3.88493600 | 1.87078100 |
| H | -1.78099900 | -3.15031400 | 3.39897100 |
| H | -0.08631000 | -2.65393100 | 3.61035500 |

---

|             |             |             |             |
|-------------|-------------|-------------|-------------|
| H           | -0.15726000 | -4.80471600 | 2.39255900  |
| H           | -1.24051500 | -4.12353200 | 1.17125100  |
| H           | 0.43323200  | -3.53105600 | 1.30862400  |
| C           | -0.85558400 | 0.09338100  | -1.39278000 |
| O           | -0.91728800 | 1.29462800  | -1.73965500 |
| C           | -2.12476600 | -0.71580100 | -1.43483200 |
| C           | -2.26118700 | -1.95813400 | -0.80782100 |
| C           | -3.21464900 | -0.18945900 | -2.13506400 |
| C           | -3.45991900 | -2.66026100 | -0.88494500 |
| H           | -1.44188200 | -2.36208400 | -0.22518200 |
| C           | -4.41270600 | -0.89215300 | -2.21841200 |
| H           | -3.09799500 | 0.77747800  | -2.61334400 |
| C           | -4.53817800 | -2.13189600 | -1.59372900 |
| H           | -3.55591800 | -3.62031000 | -0.38636900 |
| H           | -5.24905900 | -0.47394000 | -2.77004300 |
| H           | -5.47214100 | -2.68177000 | -1.65422700 |
| C           | 0.37907600  | -0.51550100 | -1.00236100 |
| C           | 1.53544200  | 0.25365000  | -1.04654900 |
| H           | 0.41818400  | -1.56466900 | -0.73150300 |
| H           | 1.46046100  | 1.17242400  | -1.62345400 |
| C           | 2.89180300  | -0.33462100 | -0.97893000 |
| C           | 3.91825600  | 0.21484500  | -1.75656700 |
| C           | 3.18692800  | -1.43513500 | -0.16142300 |
| C           | 5.19849700  | -0.33265800 | -1.74292900 |
| H           | 3.70321800  | 1.07551100  | -2.38495400 |
| C           | 4.46478500  | -1.98397900 | -0.15072400 |
| H           | 2.41254300  | -1.82637600 | 0.49358400  |
| C           | 5.47562700  | -1.43888100 | -0.94334400 |
| H           | 5.97890900  | 0.10504100  | -2.35789200 |
| H           | 4.67912500  | -2.83581200 | 0.48780200  |
| H           | 6.47281000  | -1.86717200 | -0.92851300 |
| P           | -0.56940200 | 3.12719400  | 0.72141300  |
| C           | -2.34534500 | 2.99747700  | 0.42016800  |
| C           | 0.20738200  | 3.95264000  | -0.68599200 |
| C           | -0.35094700 | 4.20536500  | 2.16272000  |
| H           | -2.49581000 | 2.34150800  | -0.43944300 |
| H           | -2.84724900 | 2.60079400  | 1.30429700  |
| H           | -2.73282000 | 3.99717800  | 0.21078800  |
| H           | 1.26192600  | 4.13802900  | -0.47619500 |
| H           | 0.09579600  | 3.29960100  | -1.55226200 |
| H           | -0.29412300 | 4.90877900  | -0.85053500 |
| H           | -0.83348700 | 3.74750200  | 3.02852600  |
| H           | 0.71590900  | 4.32058000  | 2.36414600  |
| H           | -0.79562700 | 5.18360700  | 1.96762500  |
| <b>M2'p</b> |             |             |             |
| C           | 0.59610700  | 1.68938500  | 0.80668200  |
| C           | 1.79816500  | 0.81592100  | 0.66363500  |

---

|   |             |             |             |
|---|-------------|-------------|-------------|
| C | -0.54265300 | 1.32636400  | 1.41876600  |
| H | 1.90186700  | 0.21773700  | 1.56772200  |
| H | 2.71515800  | 1.40352600  | 0.53837100  |
| H | -1.42777400 | 1.95351400  | 1.37977700  |
| C | -0.75636400 | 0.03756700  | 2.12017400  |
| O | 0.08649800  | -0.73958700 | 2.52257600  |
| O | -2.07456600 | -0.14132600 | 2.30700400  |
| C | -2.47932500 | -1.39974400 | 2.87065200  |
| C | -2.56391100 | -2.45037200 | 1.78101200  |
| H | -3.45508800 | -1.20407700 | 3.31775900  |
| H | -1.77399200 | -1.68212800 | 3.65465700  |
| H | -2.90894500 | -3.39907700 | 2.20025000  |
| H | -3.25735500 | -2.13188600 | 0.99830100  |
| H | -1.58105200 | -2.60290600 | 1.32685700  |
| C | -0.68902100 | -0.03899100 | -1.30199500 |
| O | -0.55763000 | 1.17667200  | -1.70929100 |
| C | -2.05571000 | -0.66563200 | -1.39451200 |
| C | -2.24153200 | -2.01184400 | -1.72844900 |
| C | -3.18470100 | 0.11982800  | -1.14189600 |
| C | -3.51943200 | -2.56305200 | -1.78988400 |
| H | -1.37285100 | -2.62482000 | -1.95166900 |
| C | -4.46310000 | -0.42934200 | -1.18730000 |
| H | -3.03967200 | 1.16845300  | -0.89730700 |
| C | -4.63598300 | -1.77504100 | -1.51379500 |
| H | -3.64513800 | -3.60781800 | -2.05854100 |
| H | -5.32820700 | 0.19153400  | -0.97313800 |
| H | -5.63263700 | -2.20284900 | -1.55974900 |
| C | 0.31641300  | -0.78081200 | -0.73155900 |
| C | 1.67306700  | -0.17483400 | -0.57394100 |
| H | 0.12709300  | -1.77564900 | -0.34396300 |
| H | 1.87755400  | 0.43393500  | -1.46335100 |
| C | 2.76588400  | -1.21406600 | -0.43410400 |
| C | 3.83177000  | -1.27343200 | -1.33305100 |
| C | 2.72506600  | -2.13719900 | 0.61864600  |
| C | 4.83231100  | -2.23576200 | -1.19391100 |
| H | 3.87723000  | -0.56019400 | -2.15223000 |
| C | 3.72065300  | -3.09869400 | 0.76047700  |
| H | 1.90088700  | -2.08822400 | 1.32847000  |
| C | 4.77943800  | -3.15165900 | -0.14703600 |
| H | 5.65276000  | -2.26757700 | -1.90429200 |
| H | 3.67378200  | -3.80832600 | 1.58099300  |
| H | 5.55693600  | -3.90078000 | -0.03612100 |
| P | 0.61931200  | 3.28425200  | -0.03578900 |
| C | -1.03798500 | 3.86976700  | -0.43133300 |
| C | 1.61480300  | 3.23419200  | -1.53858700 |
| C | 1.38849100  | 4.48359100  | 1.08668400  |
| H | -1.49399700 | 3.09781400  | -1.05487700 |
| H | -1.61184000 | 4.03940000  | 0.48101100  |

---

|   |             |            |             |
|---|-------------|------------|-------------|
| H | -0.94905200 | 4.81313300 | -0.97442700 |
| H | 2.63085100  | 2.90895600 | -1.30642500 |
| H | 1.12656500  | 2.53039600 | -2.21396500 |
| H | 1.64942300  | 4.24162400 | -1.95936400 |
| H | 0.78701100  | 4.56494800 | 1.99421300  |
| H | 2.39435900  | 4.14749200 | 1.34796100  |
| H | 1.44732200  | 5.45714400 | 0.59534100  |

**TS3'p**

|   |             |             |             |
|---|-------------|-------------|-------------|
| C | -0.04731100 | 1.43309500  | 0.16374800  |
| C | 1.40040900  | 0.98478400  | 0.30202700  |
| C | -0.99926200 | 1.06830200  | 1.12037800  |
| H | 1.50916200  | 0.53322100  | 1.28645900  |
| H | 2.08207000  | 1.84398100  | 0.25181100  |
| H | -1.97652100 | 1.53770000  | 1.10491200  |
| C | -0.86668600 | 0.00396800  | 2.07363200  |
| O | 0.08537400  | -0.73779000 | 2.31079900  |
| O | -2.01419100 | -0.10966100 | 2.81420700  |
| C | -2.00671200 | -1.12510700 | 3.81586600  |
| C | -3.36447900 | -1.10754100 | 4.48586500  |
| H | -1.20246900 | -0.92873600 | 4.53274000  |
| H | -1.80014100 | -2.09513400 | 3.35197400  |
| H | -3.41032400 | -1.87432000 | 5.26275900  |
| H | -3.55373000 | -0.13525100 | 4.94729700  |
| H | -4.15455900 | -1.30481300 | 3.75728100  |
| C | -0.40643300 | -0.51292300 | -1.46951800 |
| O | -0.53593400 | 0.81078300  | -1.51334000 |
| C | -1.61559900 | -1.32022800 | -1.77726600 |
| C | -1.52410700 | -2.62469700 | -2.27749300 |
| C | -2.88236000 | -0.76816000 | -1.55887700 |
| C | -2.67338500 | -3.36694000 | -2.53074500 |
| H | -0.54590000 | -3.05012700 | -2.48270700 |
| C | -4.03216000 | -1.51026800 | -1.81228800 |
| H | -2.94268600 | 0.24486700  | -1.17339300 |
| C | -3.93200400 | -2.81298900 | -2.29832200 |
| H | -2.58757800 | -4.37607600 | -2.92189800 |
| H | -5.00919700 | -1.07214600 | -1.63177100 |
| H | -4.82804100 | -3.39022000 | -2.50331500 |
| C | 0.77124300  | -1.03727600 | -1.06986900 |
| C | 1.86649800  | -0.05546500 | -0.76660300 |
| H | 0.91937600  | -2.10017500 | -0.91750200 |
| H | 2.07690000  | 0.51684800  | -1.68175700 |
| C | 3.14479400  | -0.71614300 | -0.30164200 |
| C | 4.35258500  | -0.51972500 | -0.97115300 |
| C | 3.12610800  | -1.54016100 | 0.83079100  |



---

|   |             |             |             |
|---|-------------|-------------|-------------|
| C | 5.52214700  | -1.13576100 | -0.52567100 |
| H | 4.37718700  | 0.11894100  | -1.85055800 |
| C | 4.29075300  | -2.15691900 | 1.27624500  |
| H | 2.18462400  | -1.67838900 | 1.35987900  |
| C | 5.49366300  | -1.95732200 | 0.59771900  |
| H | 6.45454000  | -0.97375600 | -1.05779300 |
| H | 4.26384100  | -2.79360100 | 2.15540200  |
| H | 6.40278300  | -2.43791800 | 0.94531300  |
| P | -0.24687300 | 3.12821000  | -0.46855200 |
| C | -1.97008700 | 3.44934100  | -0.89671700 |
| C | 0.77308400  | 3.41178200  | -1.93097400 |
| C | 0.25903200  | 4.29494500  | 0.81748900  |
| H | -2.28315500 | 2.68896500  | -1.61319900 |
| H | -2.59319700 | 3.40396100  | -0.00259300 |
| H | -2.04706400 | 4.44470900  | -1.33885000 |
| H | 1.82119500  | 3.21253800  | -1.69815500 |
| H | 0.43683700  | 2.73201800  | -2.71316500 |
| H | 0.66591500  | 4.45211600  | -2.24505300 |
| H | -0.35768800 | 4.13521400  | 1.70368400  |
| H | 1.30790000  | 4.12684900  | 1.07178500  |
| H | 0.13262300  | 5.31738500  | 0.45564900  |

**TS3''<sub>p</sub>**

|   |             |             |             |
|---|-------------|-------------|-------------|
| C | 0.05853600  | 1.82594000  | 0.57320200  |
| C | 1.32869100  | 1.51101700  | -0.13992600 |
| C | -0.54232800 | 0.73357000  | 1.19675500  |
| H | 2.12841600  | 1.21887300  | 0.54309700  |
| H | 1.71039400  | 2.32983200  | -0.75915300 |
| H | -1.61739000 | 0.73082700  | 1.37253000  |
| C | 0.09825600  | -0.19161600 | 2.16786000  |
| O | -0.52481100 | -1.01545600 | 2.81206200  |
| O | 1.42449200  | -0.03501200 | 2.30023600  |
| C | 2.07684500  | -0.92846500 | 3.21824000  |
| C | 3.53419700  | -0.52611500 | 3.27287400  |
| H | 1.94623100  | -1.95580100 | 2.86139600  |
| H | 1.59208600  | -0.84879500 | 4.19473500  |
| H | 4.07272000  | -1.18083500 | 3.96152800  |
| H | 3.99782600  | -0.60416300 | 2.28565800  |
| H | 3.63383700  | 0.50381500  | 3.62311400  |
| C | -1.38277500 | -0.49868000 | -0.95316300 |
| O | -1.72954200 | 0.48962300  | -1.64069900 |
| C | -2.43214100 | -1.51990700 | -0.59961100 |
| C | -2.28810800 | -2.44408400 | 0.44152100  |
| C | -3.60784000 | -1.53049100 | -1.35722200 |
| C | -3.29775200 | -3.36620100 | 0.70560500  |

---

|   |             |             |             |
|---|-------------|-------------|-------------|
| H | -1.40560700 | -2.42299900 | 1.07246600  |
| C | -4.61244400 | -2.45705100 | -1.09902200 |
| H | -3.71226800 | -0.79938000 | -2.15175400 |
| C | -4.45863800 | -3.38045400 | -0.06620600 |
| H | -3.17985800 | -4.07401000 | 1.52019800  |
| H | -5.51555800 | -2.45987500 | -1.70144200 |
| H | -5.24068500 | -4.10473300 | 0.13919400  |
| C | -0.05308500 | -0.63653400 | -0.45786400 |
| C | 1.00524000  | 0.23447500  | -1.06760500 |
| H | 0.24565600  | -1.59391100 | -0.04031200 |
| H | 0.59056600  | 0.65037000  | -1.99225700 |
| C | 2.28522300  | -0.49893300 | -1.39535900 |
| C | 2.85530100  | -0.41080100 | -2.66737500 |
| C | 2.95342900  | -1.24950000 | -0.42060500 |
| C | 4.05539200  | -1.05698200 | -2.96217700 |
| H | 2.35126000  | 0.16959200  | -3.43609700 |
| C | 4.15012500  | -1.89795500 | -0.70931300 |
| H | 2.52385400  | -1.31932400 | 0.57529200  |
| C | 4.70727300  | -1.80385800 | -1.98467800 |
| H | 4.47957100  | -0.97631800 | -3.95842100 |
| H | 4.64907100  | -2.47688200 | 0.06248300  |
| H | 5.64058900  | -2.30868400 | -2.21244900 |
| P | -0.95071400 | 3.12064800  | -0.04044000 |
| C | -2.71322100 | 2.84067900  | 0.26226500  |
| C | -0.73260900 | 3.44131900  | -1.81241300 |
| C | -0.54741300 | 4.69336600  | 0.77994300  |
| H | -3.01436600 | 1.94786200  | -0.28927900 |
| H | -2.89715600 | 2.71465800  | 1.33090800  |
| H | -3.26834100 | 3.71164500  | -0.09280400 |
| H | 0.31002300  | 3.68958000  | -2.02178400 |
| H | -1.02223000 | 2.53679100  | -2.34882500 |
| H | -1.36137700 | 4.28641400  | -2.10200900 |
| H | -0.73055100 | 4.59379300  | 1.85168100  |
| H | 0.50934100  | 4.91825600  | 0.61789600  |
| H | -1.15739600 | 5.50400100  | 0.37386600  |

**M3'p**

|   |             |            |             |
|---|-------------|------------|-------------|
| C | -0.19976800 | 1.21594100 | -0.47732300 |
| C | 1.31643300  | 1.01116300 | -0.24770000 |
| C | -1.03453600 | 1.24492100 | 0.72759700  |
| H | 1.48487500  | 0.98147800 | 0.82695900  |
| H | 1.91479400  | 1.83278800 | -0.66013100 |
| H | -2.07589700 | 1.52001800 | 0.59903900  |
| C | -0.69812600 | 0.74492100 | 1.99369500  |
| O | 0.36185800  | 0.26499100 | 2.43608900  |

---

|   |             |             |             |
|---|-------------|-------------|-------------|
| O | -1.77763400 | 0.85547500  | 2.86516000  |
| C | -1.55163700 | 0.38656500  | 4.18626100  |
| C | -2.83942700 | 0.58267600  | 4.96127300  |
| H | -0.72481800 | 0.93899300  | 4.64717800  |
| H | -1.25835000 | -0.66929800 | 4.16734900  |
| H | -2.72077200 | 0.23376200  | 5.99005300  |
| H | -3.11772800 | 1.63949100  | 4.98370200  |
| H | -3.65551900 | 0.02247900  | 4.49766800  |
| C | -0.47035100 | -1.05244100 | -1.14424800 |
| O | -0.70114000 | 0.25210500  | -1.50917300 |
| C | -1.65199900 | -1.93549700 | -1.18059300 |
| C | -1.51574000 | -3.31950100 | -1.34559000 |
| C | -2.93326800 | -1.38971700 | -1.04560500 |
| C | -2.63716800 | -4.14175400 | -1.35005800 |
| H | -0.52841500 | -3.74865600 | -1.48824400 |
| C | -4.05436600 | -2.21448100 | -1.05378800 |
| H | -3.03262100 | -0.31657800 | -0.92035700 |
| C | -3.91080000 | -3.59219800 | -1.20405800 |
| H | -2.51824200 | -5.21277100 | -1.48031300 |
| H | -5.04283500 | -1.78024400 | -0.94108400 |
| H | -4.78572600 | -4.23407600 | -1.21413900 |
| C | 0.77307200  | -1.38220600 | -0.77813600 |
| C | 1.83033700  | -0.31223400 | -0.87604400 |
| H | 1.02206100  | -2.37548700 | -0.42211200 |
| H | 2.00457200  | -0.11921100 | -1.94475100 |
| C | 3.14236700  | -0.72392900 | -0.24589700 |
| C | 4.31846500  | -0.78465900 | -0.99299400 |
| C | 3.18412500  | -1.05097800 | 1.11499000  |
| C | 5.52001800  | -1.16814800 | -0.39734900 |
| H | 4.29431400  | -0.53083600 | -2.04984400 |
| C | 4.38158600  | -1.43622100 | 1.70957200  |
| H | 2.26729700  | -0.98064500 | 1.69851000  |
| C | 5.55388200  | -1.49658800 | 0.95475400  |
| H | 6.42770000  | -1.20975200 | -0.99149000 |
| H | 4.40363700  | -1.68851300 | 2.76549200  |
| H | 6.48761900  | -1.79639600 | 1.42014500  |
| P | -0.47785700 | 2.77257900  | -1.44074600 |
| C | -2.24011300 | 2.98044200  | -1.77731600 |
| C | 0.39038800  | 2.71892100  | -3.02722300 |
| C | 0.10623000  | 4.17914200  | -0.47245900 |
| H | -2.61002200 | 2.07720300  | -2.26611800 |
| H | -2.77609500 | 3.14333000  | -0.84164100 |
| H | -2.38062700 | 3.84248500  | -2.43239300 |
| H | 1.46490700  | 2.62176800  | -2.85973400 |

---

|   |             |            |             |
|---|-------------|------------|-------------|
| H | 0.02973700  | 1.85313900 | -3.58488900 |
| H | 0.19396100  | 3.63454600 | -3.58884900 |
| H | -0.35995200 | 4.12321000 | 0.51283600  |
| H | 1.19188200  | 4.13553000 | -0.36670300 |
| H | -0.17415800 | 5.10814600 | -0.97212600 |

**M3''<sub>P</sub>**

|   |             |             |             |
|---|-------------|-------------|-------------|
| C | 1.69835600  | 0.02886100  | -0.91931600 |
| C | 1.33432700  | -1.43403100 | -0.82800500 |
| C | 0.59254000  | 0.81671100  | -0.22707200 |
| H | 1.51510700  | -1.89009200 | 0.16107600  |
| H | 1.84176700  | -2.06457600 | -1.56826400 |
| H | 0.44744400  | 1.82106100  | -0.64449400 |
| C | 1.00041700  | 1.02258500  | 1.21469500  |
| O | 1.61215600  | 1.99576100  | 1.61782300  |
| O | 0.73889100  | -0.03873600 | 1.99618600  |
| C | 1.29122000  | -0.00618400 | 3.32313100  |
| C | 0.92584600  | -1.31345700 | 3.98926100  |
| H | 0.88046100  | 0.85650600  | 3.85514300  |
| H | 2.37472400  | 0.12705300  | 3.24761000  |
| H | 1.31918700  | -1.33481400 | 5.00794900  |
| H | -0.15973600 | -1.43231900 | 4.03404000  |
| H | 1.34837800  | -2.15662800 | 3.43649800  |
| C | -1.74666100 | 0.63530800  | -1.17103200 |
| O | -2.07397300 | 0.30686700  | -2.29690700 |
| C | -2.39689100 | 1.81954200  | -0.51332200 |
| C | -2.19381600 | 2.14103900  | 0.83322400  |
| C | -3.23626900 | 2.62405300  | -1.29136000 |
| C | -2.82102900 | 3.25226200  | 1.38963600  |
| H | -1.56005400 | 1.52392500  | 1.46335000  |
| C | -3.85873500 | 3.73530600  | -0.73683100 |
| H | -3.38517600 | 2.36092300  | -2.33331000 |
| C | -3.65123700 | 4.05075400  | 0.60605200  |
| H | -2.66126100 | 3.49301100  | 2.43526500  |
| H | -4.50460000 | 4.35679800  | -1.34829600 |
| H | -4.13665000 | 4.91805400  | 1.04193600  |
| C | -0.66352800 | -0.09739700 | -0.39985400 |
| C | -0.18864100 | -1.39536700 | -1.08844900 |
| H | -1.07058300 | -0.33826400 | 0.58647200  |
| H | -0.34227400 | -1.26918200 | -2.16405900 |
| C | -0.94018300 | -2.62227400 | -0.63003800 |
| C | -1.64260100 | -3.41756000 | -1.53711700 |
| C | -0.94046800 | -2.99197500 | 0.72158500  |
| C | -2.32561300 | -4.55665000 | -1.11206600 |
| H | -1.65597100 | -3.13715100 | -2.58740100 |

---

|   |             |             |             |
|---|-------------|-------------|-------------|
| C | -1.61948800 | -4.12801000 | 1.15018500  |
| H | -0.40441200 | -2.37477500 | 1.44057300  |
| C | -2.31485800 | -4.91613100 | 0.23286400  |
| H | -2.86759300 | -5.16142800 | -1.83270900 |
| H | -1.60850800 | -4.39909300 | 2.20172100  |
| H | -2.84641900 | -5.80207500 | 0.56565500  |
| P | 3.28128100  | 0.62775700  | -1.02832700 |
| C | 3.25407200  | 2.40802100  | -1.38941500 |
| C | 4.20239400  | -0.21209400 | -2.35393500 |
| C | 4.43655600  | 0.51848400  | 0.40463000  |
| H | 2.69095900  | 2.58939600  | -2.30632800 |
| H | 2.77151400  | 2.91879000  | -0.55251900 |
| H | 4.27515800  | 2.77914200  | -1.49853700 |
| H | 4.25313800  | -1.28183900 | -2.13855600 |
| H | 3.68987200  | -0.06079300 | -3.30484400 |
| H | 5.21846900  | 0.18452800  | -2.40982900 |
| H | 3.99407900  | 1.06260500  | 1.24298500  |
| H | 4.55721800  | -0.53154500 | 0.68437800  |
| H | 5.41568500  | 0.94451700  | 0.16786700  |

### DABCO

|   |             |             |             |
|---|-------------|-------------|-------------|
| N | 0.00000000  | 0.00000000  | 1.28589000  |
| C | -0.03976300 | 1.37639600  | 0.77791800  |
| C | 0.03976300  | 1.37639600  | -0.77791800 |
| H | 0.79352600  | 1.93151300  | 1.22129100  |
| H | -0.96911500 | 1.83753400  | 1.12890900  |
| H | -0.79352600 | 1.93151300  | -1.22129100 |
| H | 0.96911500  | 1.83753400  | -1.12890900 |
| C | 1.21187500  | -0.65376300 | 0.77791800  |
| C | 1.17211300  | -0.72263400 | -0.77791800 |
| H | 1.27597600  | -1.65297000 | 1.22129100  |
| H | 2.07590900  | -0.07948900 | 1.12890900  |
| H | 2.06950200  | -0.27854300 | -1.22129100 |
| H | 1.10679400  | -1.75804500 | -1.12890900 |
| C | -1.17211300 | -0.72263400 | 0.77791800  |
| C | -1.21187500 | -0.65376300 | -0.77791800 |
| H | -2.06950200 | -0.27854300 | 1.22129100  |
| H | -1.10679400 | -1.75804500 | 1.12890900  |
| H | -1.27597600 | -1.65297000 | -1.22129100 |
| H | -2.07590900 | -0.07948900 | -1.12890900 |
| N | 0.00000000  | 0.00000000  | -1.28589000 |

### TS1<sub>D</sub>

|   |             |            |             |
|---|-------------|------------|-------------|
| C | 0.06462100  | 1.78819400 | -0.17185700 |
| C | -0.51510400 | 2.87689400 | 0.29656300  |
| C | 1.25716200  | 1.30359700 | -0.64732200 |
| H | 0.11264500  | 3.73486700 | 0.51196300  |

---

|   |             |             |             |
|---|-------------|-------------|-------------|
| H | -1.57661400 | 2.97890800  | 0.48522100  |
| H | 1.63878300  | 1.62813900  | -1.60695500 |
| C | 2.01364000  | 0.38367800  | 0.14534800  |
| O | 1.65799000  | -0.14475100 | 1.19850200  |
| O | 3.23488000  | 0.11437000  | -0.39376600 |
| C | 4.04441600  | -0.79548000 | 0.34973100  |
| C | 5.35577500  | -0.94186600 | -0.39260100 |
| H | 3.52379900  | -1.75446700 | 0.44510000  |
| H | 4.19301000  | -0.40646300 | 1.36194300  |
| H | 6.01734300  | -1.62691200 | 0.14332500  |
| H | 5.18741900  | -1.33634500 | -1.39750200 |
| H | 5.85539600  | 0.02564700  | -0.48147500 |
| N | -3.09775000 | -1.42864800 | 0.01714800  |
| C | -1.96620500 | -1.84467000 | -0.81877000 |
| C | -0.82049800 | -0.80165600 | -0.74032100 |
| H | -2.33035300 | -1.96011200 | -1.84439400 |
| H | -1.61314500 | -2.82215700 | -0.47879000 |
| H | -0.00061100 | -1.14404500 | -0.10742400 |
| H | -0.40646000 | -0.54117100 | -1.71809000 |
| C | -3.67997100 | -0.22532600 | -0.57786100 |
| C | -2.57449600 | 0.83746400  | -0.84011700 |
| H | -4.43666600 | 0.16363100  | 0.11019700  |
| H | -4.18319100 | -0.49443600 | -1.51115400 |
| H | -2.31987500 | 0.91805900  | -1.90089400 |
| H | -2.88619000 | 1.82365600  | -0.49182400 |
| C | -2.59277800 | -1.09317300 | 1.35379200  |
| C | -1.66366600 | 0.15254200  | 1.29528700  |
| H | -2.05082900 | -1.96275500 | 1.73726200  |
| H | -3.44345300 | -0.91092900 | 2.01686700  |
| H | -2.14867700 | 1.04191600  | 1.70801400  |
| H | -0.71181100 | 0.00300700  | 1.81020300  |
| N | -1.34522800 | 0.43490900  | -0.12296300 |

### **M1<sub>D</sub>**

|   |             |             |             |
|---|-------------|-------------|-------------|
| C | 0.03399700  | 0.99130700  | -0.03090100 |
| C | 0.02151600  | 2.34329100  | 0.01536700  |
| C | -1.04635700 | 0.06845600  | -0.04703900 |
| H | -0.95042300 | 2.81338500  | 0.03594900  |
| H | 0.89939600  | 2.96725300  | 0.04639100  |
| H | -0.88509200 | -0.99876500 | -0.05445300 |
| C | -2.39095300 | 0.49774000  | -0.01545800 |
| O | -2.83697500 | 1.64679000  | 0.00985100  |
| O | -3.26375000 | -0.57690800 | -0.01544200 |
| C | -4.64057200 | -0.23221200 | 0.01905400  |
| C | -5.42869300 | -1.52693900 | 0.01201200  |
| H | -4.89208400 | 0.39335000  | -0.84480200 |
| H | -4.85622900 | 0.36140200  | 0.91474000  |
| H | -6.50182500 | -1.32090000 | 0.03566300  |

---

|   |             |             |             |
|---|-------------|-------------|-------------|
| H | -5.20558500 | -2.10568200 | -0.88791700 |
| H | -5.17242100 | -2.13588300 | 0.88269800  |
| N | 3.64178200  | -0.98755400 | 0.03421300  |
| C | 2.94971700  | -1.12048600 | 1.31583400  |
| C | 1.51979200  | -0.53711700 | 1.23214500  |
| H | 3.53849400  | -0.60239500 | 2.07757400  |
| H | 2.90214800  | -2.17682200 | 1.59149400  |
| H | 0.75562000  | -1.30938500 | 1.17351600  |
| H | 1.26975900  | 0.12871200  | 2.05962100  |
| C | 3.87125200  | 0.43255200  | -0.21582000 |
| C | 2.56422500  | 1.24602600  | -0.04675500 |
| H | 4.26495200  | 0.54480800  | -1.22957800 |
| H | 4.62753500  | 0.80477800  | 0.47942400  |
| H | 2.53113300  | 1.80069200  | 0.89206500  |
| H | 2.39748500  | 1.93712400  | -0.87198200 |
| C | 2.77941700  | -1.50934900 | -1.02656600 |
| C | 1.55080900  | -0.59565500 | -1.23823300 |
| H | 2.46701700  | -2.51947000 | -0.74786000 |
| H | 3.35094400  | -1.58029300 | -1.95545400 |
| H | 1.66514400  | 0.08365100  | -2.08594400 |
| H | 0.62372900  | -1.14729300 | -1.36925000 |
| N | 1.39696000  | 0.29569400  | -0.02549900 |

### TS<sub>2D</sub>

|   |             |             |             |
|---|-------------|-------------|-------------|
| C | -0.59745200 | -0.86830900 | 0.90428100  |
| C | -0.90001700 | 0.26913400  | 1.55728100  |
| C | 0.71706400  | -1.28485100 | 0.48858600  |
| H | -0.08554700 | 0.88017100  | 1.91280300  |
| H | -1.90328500 | 0.60306000  | 1.77315900  |
| H | 0.82067600  | -2.28849500 | 0.09217300  |
| C | 1.92423000  | -1.00996600 | 1.27429300  |
| O | 2.84961900  | -1.79201500 | 1.38456600  |
| O | 1.97638900  | 0.23227100  | 1.80543900  |
| C | 3.18174100  | 0.55139600  | 2.50977100  |
| C | 3.07787000  | 2.00374800  | 2.92190800  |
| H | 4.03452100  | 0.37001800  | 1.84871800  |
| H | 3.28061700  | -0.11474700 | 3.37281400  |
| H | 3.97571100  | 2.30739800  | 3.46526400  |
| H | 2.97226300  | 2.64417300  | 2.04150800  |
| H | 2.21078800  | 2.16184400  | 3.56844600  |
| C | -0.85967900 | 1.46494200  | -1.08964100 |
| O | -1.61889900 | 0.62280200  | -1.63591900 |
| C | -1.47515700 | 2.78471700  | -0.69054300 |
| C | -2.67108800 | 3.15768700  | -1.30973300 |
| C | -0.92671700 | 3.63133300  | 0.27893000  |
| C | -3.29575100 | 4.35840500  | -0.98928800 |
| H | -3.09086200 | 2.48134400  | -2.04682500 |
| C | -1.55409100 | 4.82970000  | 0.60707000  |

---

|   |             |             |             |
|---|-------------|-------------|-------------|
| H | -0.01969400 | 3.33964400  | 0.80037600  |
| C | -2.73753400 | 5.19976800  | -0.02928300 |
| H | -4.21878300 | 4.63954600  | -1.48748500 |
| H | -1.12201400 | 5.47470400  | 1.36619800  |
| H | -3.22404600 | 6.13603500  | 0.22636400  |
| C | 0.52475500  | 1.25679400  | -0.87158400 |
| C | 1.08628200  | 0.00972800  | -1.17179500 |
| H | 1.12139900  | 2.04629700  | -0.43313000 |
| H | 0.47132300  | -0.60921600 | -1.82250700 |
| C | 2.54297600  | -0.20213400 | -1.35528600 |
| C | 2.98832100  | -1.35927100 | -2.00474300 |
| C | 3.50248300  | 0.69816100  | -0.87750000 |
| C | 4.34391700  | -1.61369300 | -2.17494600 |
| H | 2.25284900  | -2.06872900 | -2.37789600 |
| C | 4.86083800  | 0.44558100  | -1.04408000 |
| H | 3.18464000  | 1.60322400  | -0.36919800 |
| C | 5.28832200  | -0.71116700 | -1.69134500 |
| H | 4.66442400  | -2.51737700 | -2.68405600 |
| H | 5.58876600  | 1.15777400  | -0.66673000 |
| H | 6.34806000  | -0.90660000 | -1.81981000 |
| N | -1.72655800 | -1.78366700 | 0.46768900  |
| C | -1.76939100 | -2.95921900 | 1.41767700  |
| C | -3.07277600 | -1.09445100 | 0.51538000  |
| C | -1.57254500 | -2.30849400 | -0.95115900 |
| C | -3.05043700 | -3.78307500 | 1.14032500  |
| H | -1.73681900 | -2.54401100 | 2.42597400  |
| H | -0.85371300 | -3.52809200 | 1.24544100  |
| C | -4.14069200 | -2.04825700 | -0.06766700 |
| H | -2.96379800 | -0.17264400 | -0.06154500 |
| H | -3.27062000 | -0.87426100 | 1.56475800  |
| C | -2.58903800 | -3.45264600 | -1.16491300 |
| H | -0.55413800 | -2.66237500 | -1.08077500 |
| H | -1.72816800 | -1.43815200 | -1.59053700 |
| H | -2.81043000 | -4.84918500 | 1.13944300  |
| H | -3.79674900 | -3.60886200 | 1.92006100  |
| N | -3.63934600 | -3.41967200 | -0.14797500 |
| H | -5.03511700 | -2.02455200 | 0.55977600  |
| H | -4.42758400 | -1.73009700 | -1.07332200 |
| H | -3.04153900 | -3.35375100 | -2.15474400 |
| H | -2.09728400 | -4.42855300 | -1.11739300 |

## M2<sub>D</sub>

|   |             |             |             |
|---|-------------|-------------|-------------|
| C | 0.40844200  | 1.04557900  | 0.92459700  |
| C | 1.04916600  | 0.39091600  | 1.88814100  |
| C | -0.91680400 | 0.60717100  | 0.37942000  |
| H | 0.55479000  | -0.46026300 | 2.33344000  |
| H | 2.03964400  | 0.64003900  | 2.24141000  |
| H | -1.46076200 | 1.43194200  | -0.08529100 |



---

|   |             |             |             |
|---|-------------|-------------|-------------|
| C | -1.85835100 | 0.06457700  | 1.43170900  |
| O | -1.60296600 | -0.76638700 | 2.27321700  |
| O | -3.08789500 | 0.56594900  | 1.24750800  |
| C | -4.14274500 | -0.05573800 | 1.99930400  |
| C | -5.44683000 | 0.36199600  | 1.35813100  |
| H | -4.06678400 | 0.26273100  | 3.04383700  |
| H | -4.00227500 | -1.13950400 | 1.96266800  |
| H | -6.28593200 | -0.09165700 | 1.89086300  |
| H | -5.56498500 | 1.44789100  | 1.38408800  |
| H | -5.46954800 | 0.02820700  | 0.31729800  |
| C | 1.58215700  | -1.34079000 | -0.60230700 |
| O | 2.02871700  | -0.26909200 | -1.15784200 |
| C | 2.61319800  | -2.36589100 | -0.20082600 |
| C | 3.85600000  | -2.33667400 | -0.84021300 |
| C | 2.40245000  | -3.32113800 | 0.80027500  |
| C | 4.85070200  | -3.25324900 | -0.51600400 |
| H | 4.01276600  | -1.57383200 | -1.59533200 |
| C | 3.39677600  | -4.23749600 | 1.13055300  |
| H | 1.46037700  | -3.32788400 | 1.34070600  |
| C | 4.62416400  | -4.21123900 | 0.47055200  |
| H | 5.80658400  | -3.22103400 | -1.03141700 |
| H | 3.21805500  | -4.96922100 | 1.91321900  |
| H | 5.39988900  | -4.92557200 | 0.72962400  |
| C | 0.25004700  | -1.59797100 | -0.36491700 |
| C | -0.73660200 | -0.55841300 | -0.74773500 |
| H | -0.07856400 | -2.54229500 | 0.04815800  |
| H | -0.31911400 | -0.01535500 | -1.60268700 |
| C | -2.11735500 | -1.05009700 | -1.13446900 |
| C | -2.82220600 | -0.39809100 | -2.14955500 |
| C | -2.74471000 | -2.10891400 | -0.46904300 |
| C | -4.11174100 | -0.78839700 | -2.50009300 |
| H | -2.34574600 | 0.42414500  | -2.67951700 |
| C | -4.03659400 | -2.50071300 | -0.81172500 |
| H | -2.22319500 | -2.61989500 | 0.33487500  |
| C | -4.72548800 | -1.84376900 | -1.83009000 |
| H | -4.63458400 | -0.27234100 | -3.29955700 |
| H | -4.50526800 | -3.32661900 | -0.28475500 |
| H | -5.72940600 | -2.15495800 | -2.10128900 |
| N | 1.03003400  | 2.26288900  | 0.29437700  |
| C | 0.50264200  | 3.49915900  | 0.98642700  |
| C | 2.54060300  | 2.24545100  | 0.44069300  |
| C | 0.74578400  | 2.38655000  | -1.19578400 |
| C | 1.32800200  | 4.72170200  | 0.51083900  |
| H | 0.58703400  | 3.32087000  | 2.05907200  |
| H | -0.55580500 | 3.57581800  | 0.72513400  |
| C | 3.12735900  | 3.42739600  | -0.36232800 |
| H | 2.85115300  | 1.26172900  | 0.07391900  |
| H | 2.75015700  | 2.35974400  | 1.50437000  |

---

|   |             |            |             |
|---|-------------|------------|-------------|
| C | 1.19006600  | 3.78905700 | -1.66573100 |
| H | -0.32220800 | 2.25357900 | -1.35069400 |
| H | 1.28300900  | 1.54729600 | -1.64499300 |
| H | 0.65878700  | 5.56080600 | 0.30515600  |
| H | 2.02883400  | 5.03430900 | 1.28957700  |
| N | 2.09118600  | 4.40616000 | -0.69445800 |
| H | 3.91328700  | 3.91374900 | 0.22101500  |
| H | 3.57192900  | 3.07224700 | -1.29552900 |
| H | 1.69936400  | 3.70296400 | -2.62868000 |
| H | 0.32832600  | 4.44941500 | -1.80010300 |

**TS2'<sub>b</sub>**

|   |             |             |             |
|---|-------------|-------------|-------------|
| C | 1.03697400  | 0.50063900  | 0.94345900  |
| C | 1.68809500  | -0.72909800 | 0.88762400  |
| C | -0.30314300 | 0.66875900  | 1.23098200  |
| H | 1.21907600  | -1.51591500 | 1.46065500  |
| H | 2.76616300  | -0.80161800 | 0.79849400  |
| H | -0.81339400 | 1.60945900  | 1.10168200  |
| C | -1.13989300 | -0.37329200 | 1.79038400  |
| O | -0.85458800 | -1.52748200 | 2.08138000  |
| O | -2.39173600 | 0.11439500  | 2.00796300  |
| C | -3.34334800 | -0.81982600 | 2.51387800  |
| C | -4.62983700 | -0.05969800 | 2.75614100  |
| H | -2.95616300 | -1.27523400 | 3.43045500  |
| H | -3.48229600 | -1.62669200 | 1.78425900  |
| H | -5.40363200 | -0.73660300 | 3.12638100  |
| H | -4.47480700 | 0.72906700  | 3.49610800  |
| H | -4.97850000 | 0.40122700  | 1.82865500  |
| C | -0.74382400 | 0.06750800  | -1.55356500 |
| O | 0.10903800  | 0.89263500  | -1.96374200 |
| C | -2.19629100 | 0.47029200  | -1.61010000 |
| C | -2.52525600 | 1.63293400  | -2.31303700 |
| C | -3.22220900 | -0.25216200 | -0.99123600 |
| C | -3.84531800 | 2.06222800  | -2.40461500 |
| H | -1.71939000 | 2.18194200  | -2.78865100 |
| C | -4.54360200 | 0.17209500  | -1.08506400 |
| H | -2.99283200 | -1.14639300 | -0.42160600 |
| C | -4.86029000 | 1.33186000  | -1.79073300 |
| H | -4.08506600 | 2.96424200  | -2.95950200 |
| H | -5.32880100 | -0.40378600 | -0.60365800 |
| H | -5.89196100 | 1.66215600  | -1.86197400 |
| C | -0.39207300 | -1.22283800 | -1.06691500 |
| C | 0.95043100  | -1.57586600 | -0.95570500 |
| H | -1.15517500 | -1.91160900 | -0.72823800 |
| H | 1.63746000  | -0.99049100 | -1.56383500 |

---

|   |             |             |             |
|---|-------------|-------------|-------------|
| C | 1.36339100  | -2.97821200 | -0.70649400 |
| C | 2.48056900  | -3.50655800 | -1.36052900 |
| C | 0.65349900  | -3.79796600 | 0.18161800  |
| C | 2.86712000  | -4.82894800 | -1.15730700 |
| H | 3.04256100  | -2.87640800 | -2.04554400 |
| C | 1.03852600  | -5.11812200 | 0.38229800  |
| H | -0.18083500 | -3.37399700 | 0.73585000  |
| C | 2.14447500  | -5.64102400 | -0.28799100 |
| H | 3.73269200  | -5.22493700 | -1.67980800 |
| H | 0.47924900  | -5.74117800 | 1.07366400  |
| H | 2.44421300  | -6.67166500 | -0.12636000 |
| N | 1.83108600  | 1.73231800  | 0.56103200  |
| C | 0.96366000  | 2.91664000  | 0.19219100  |
| C | 2.66546300  | 2.13121800  | 1.75897400  |
| C | 2.75855700  | 1.49072700  | -0.61577500 |
| C | 1.87480500  | 4.05200400  | -0.32594700 |
| H | 0.43967300  | 3.21045200  | 1.10242300  |
| H | 0.25851200  | 2.56015600  | -0.56131900 |
| C | 3.32486000  | 3.50226400  | 1.47597300  |
| H | 3.39336100  | 1.33101400  | 1.90358400  |
| H | 1.99091700  | 2.14734500  | 2.61636300  |
| C | 3.75389800  | 2.66934600  | -0.70632100 |
| H | 2.09743200  | 1.38736600  | -1.47718400 |
| H | 3.27532100  | 0.54888100  | -0.45421400 |
| H | 1.82175300  | 4.11763500  | -1.41578000 |
| H | 1.53768800  | 5.00708800  | 0.08472800  |
| N | 3.26989700  | 3.82360400  | 0.05051600  |
| H | 2.81527200  | 4.29722400  | 2.02699600  |
| H | 4.36770900  | 3.48399800  | 1.80248400  |
| H | 4.73369600  | 2.38675700  | -0.31039100 |
| H | 3.88607200  | 2.95325000  | -1.75349100 |

**M2'<sub>D</sub>**

|   |             |             |            |
|---|-------------|-------------|------------|
| C | -1.27883200 | -0.12792200 | 0.93000500 |
| C | -1.20902900 | 1.32824600  | 0.64614100 |
| C | -0.27051900 | -0.78959900 | 1.51353000 |
| H | -0.72091100 | 1.80107400  | 1.49571300 |
| H | -2.18947400 | 1.79754200  | 0.53227300 |
| H | -0.21259500 | -1.86737900 | 1.55442600 |
| C | 0.93160600  | -0.12620300 | 2.07717500 |
| O | 1.03104800  | 1.00645800  | 2.50498400 |
| O | 1.93140500  | -1.01876000 | 2.15485500 |
| C | 3.15830200  | -0.52680300 | 2.71098000 |
| C | 4.13653300  | -1.67974500 | 2.72387700 |
| H | 2.96158500  | -0.13614300 | 3.71409000 |

---

|   |             |             |             |
|---|-------------|-------------|-------------|
| H | 3.51229200  | 0.30850100  | 2.09729600  |
| H | 5.10020700  | -1.34540800 | 3.11535700  |
| H | 3.76679300  | -2.49040600 | 3.35605400  |
| H | 4.27916300  | -2.06486300 | 1.71157900  |
| C | 0.81313900  | -0.45015500 | -1.27537100 |
| O | -0.30335300 | -0.98598100 | -1.62268500 |
| C | 2.05276200  | -1.28754200 | -1.46091700 |
| C | 1.97411500  | -2.40138100 | -2.30191600 |
| C | 3.27534800  | -1.01347100 | -0.83748800 |
| C | 3.08600600  | -3.20479100 | -2.53625300 |
| H | 1.01615600  | -2.61038700 | -2.76569600 |
| C | 4.39080800  | -1.81210100 | -1.07164400 |
| H | 3.35039900  | -0.17386500 | -0.15295600 |
| C | 4.30232000  | -2.91175800 | -1.92427400 |
| H | 3.00611200  | -4.06069500 | -3.20051400 |
| H | 5.33280700  | -1.57829700 | -0.58278000 |
| H | 5.17291700  | -3.53441400 | -2.10652600 |
| C | 0.91672900  | 0.82541300  | -0.76540400 |
| C | -0.31966700 | 1.65531500  | -0.64258900 |
| H | 1.87389800  | 1.27985600  | -0.54083800 |
| H | -0.95826000 | 1.43914400  | -1.50848700 |
| C | -0.02840800 | 3.14103000  | -0.61674100 |
| C | -0.55923200 | 3.99709000  | -1.58197600 |
| C | 0.78073900  | 3.68328100  | 0.38866700  |
| C | -0.28738400 | 5.36406100  | -1.55284800 |
| H | -1.18563100 | 3.58616200  | -2.36989700 |
| C | 1.05419000  | 5.04673000  | 0.42024100  |
| H | 1.19401600  | 3.02050900  | 1.14746900  |
| C | 0.52045200  | 5.89307000  | -0.55114000 |
| H | -0.70562400 | 6.01465400  | -2.31504500 |
| H | 1.68670600  | 5.45197400  | 1.20442000  |
| H | 0.73465900  | 6.95694700  | -0.52659000 |
| N | -2.50247100 | -0.86811800 | 0.47016300  |
| C | -2.26371900 | -2.35141800 | 0.29255100  |
| C | -3.58840600 | -0.68695800 | 1.50588600  |
| C | -3.01130200 | -0.32176100 | -0.85829900 |
| C | -3.61899000 | -3.04343400 | 0.00267900  |
| H | -1.85056800 | -2.72738400 | 1.22584200  |
| H | -1.51773900 | -2.41702600 | -0.50558800 |
| C | -4.90907600 | -1.27951900 | 0.94727100  |
| H | -3.66260200 | 0.38163600  | 1.71485000  |
| H | -3.23823300 | -1.19525000 | 2.40677300  |
| C | -4.20713600 | -1.18100700 | -1.32465000 |
| H | -2.14465300 | -0.35750300 | -1.52423300 |
| H | -3.31647800 | 0.70677500  | -0.67097100 |
| H | -3.51936400 | -3.69980800 | -0.86499900 |
| H | -3.92330000 | -3.65788400 | 0.85424200  |
| N | -4.67248200 | -2.06745900 | -0.25966100 |

---

|   |             |             |             |
|---|-------------|-------------|-------------|
| H | -5.37448300 | -1.91438300 | 1.70524000  |
| H | -5.61189800 | -0.47918400 | 0.70153500  |
| H | -5.03004300 | -0.53329500 | -1.63745100 |
| H | -3.92208200 | -1.79790800 | -2.18031200 |

**TS3'd**

|   |             |             |             |
|---|-------------|-------------|-------------|
| C | -0.88564900 | -0.54303700 | 0.50243600  |
| C | -1.27555000 | 0.91311200  | 0.50452900  |
| C | 0.10312200  | -1.01126100 | 1.33180600  |
| H | -0.84674800 | 1.34811900  | 1.40508000  |
| H | -2.36094800 | 1.04040900  | 0.57236000  |
| H | 0.37809700  | -2.05686800 | 1.31569600  |
| C | 1.08462300  | -0.17402900 | 2.00283900  |
| O | 1.04488900  | 1.01403100  | 2.28833900  |
| O | 2.15279200  | -0.93562200 | 2.35677700  |
| C | 3.23827700  | -0.23459400 | 2.96510000  |
| C | 4.38212600  | -1.21720900 | 3.09829200  |
| H | 2.92032400  | 0.15811000  | 3.93686800  |
| H | 3.50858300  | 0.61973600  | 2.33766600  |
| H | 5.24505400  | -0.73056400 | 3.55915300  |
| H | 4.09076700  | -2.06801400 | 3.71902100  |
| H | 4.67505600  | -1.58983200 | 2.11382000  |
| C | 0.83484200  | 0.04569800  | -1.39901200 |
| O | -0.19050500 | -0.78070400 | -1.35597600 |
| C | 2.17871000  | -0.52119000 | -1.70225900 |
| C | 3.18011000  | 0.24429400  | -2.30978000 |
| C | 2.46223500  | -1.84654200 | -1.36005300 |
| C | 4.43988200  | -0.29586500 | -2.54734600 |
| H | 2.95808400  | 1.26443400  | -2.60940500 |
| C | 3.72235200  | -2.38772000 | -1.59385500 |
| H | 1.68055000  | -2.43649600 | -0.89215000 |
| C | 4.71722200  | -1.61370000 | -2.18809100 |
| H | 5.20544100  | 0.30987500  | -3.02294600 |
| H | 3.93085100  | -3.41586100 | -1.31254000 |
| H | 5.69935800  | -2.03641000 | -2.37586500 |
| C | 0.65363300  | 1.34464700  | -1.06211000 |
| C | -0.75041200 | 1.74226100  | -0.71628600 |
| H | 1.46920800  | 2.05148700  | -0.96722700 |
| H | -1.39514300 | 1.48214100  | -1.56837900 |
| C | -0.90314000 | 3.21620800  | -0.41725500 |
| C | -1.77198700 | 4.01740700  | -1.15772700 |
| C | -0.16829500 | 3.79857300  | 0.62234600  |
| C | -1.90736100 | 5.37558800  | -0.87420400 |
| H | -2.34296100 | 3.57350800  | -1.96974500 |
| C | -0.30209400 | 5.15350500  | 0.90723900  |
| H | 0.50331800  | 3.17219800  | 1.20734200  |
| C | -1.17223300 | 5.94687800  | 0.15960400  |
| H | -2.58460100 | 5.98615000  | -1.46376000 |

---

|   |             |             |             |
|---|-------------|-------------|-------------|
| H | 0.27370100  | 5.59416800  | 1.71556200  |
| H | -1.27466800 | 7.00436700  | 0.38242000  |
| N | -2.02847400 | -1.51632800 | 0.19344800  |
| C | -2.84741600 | -1.10582800 | -1.01419500 |
| C | -1.52473100 | -2.91937000 | -0.06689400 |
| C | -2.94875100 | -1.58654200 | 1.39357400  |
| C | -4.14053500 | -1.94988900 | -1.03603400 |
| H | -2.20189200 | -1.26603400 | -1.87387100 |
| H | -3.05607200 | -0.04038200 | -0.94001000 |
| C | -2.70860100 | -3.77814100 | -0.56630400 |
| H | -1.14407400 | -3.29299300 | 0.88358500  |
| H | -0.71340600 | -2.81690300 | -0.78598700 |
| C | -3.94346900 | -2.75321100 | 1.18545000  |
| H | -3.45229400 | -0.62057600 | 1.46264300  |
| H | -2.31128700 | -1.71274500 | 2.26872100  |
| H | -4.99274000 | -1.38203900 | -0.65127500 |
| H | -4.36837000 | -2.23428300 | -2.06649800 |
| N | -3.98799800 | -3.15588300 | -0.22030900 |
| H | -2.66994400 | -3.90173600 | -1.65175300 |
| H | -2.65337100 | -4.77204300 | -0.11471200 |
| H | -3.65175700 | -3.62114000 | 1.78285800  |
| H | -4.94168300 | -2.44619700 | 1.50739200  |

**TS3''<sub>D</sub>**

|   |             |             |             |
|---|-------------|-------------|-------------|
| C | 1.05452200  | -1.02438900 | 0.72336900  |
| C | 0.12001500  | -1.85196800 | -0.07977400 |
| C | 0.42900600  | 0.13791600  | 1.20240600  |
| H | -0.63001000 | -2.31928700 | 0.56107500  |
| H | 0.57951700  | -2.66124000 | -0.65661600 |
| H | 0.99577000  | 1.04698400  | 1.38040500  |
| C | -0.67264600 | 0.10669700  | 2.20661500  |
| O | -0.99520700 | 1.07406700  | 2.86771900  |
| O | -1.29901900 | -1.07621300 | 2.32520300  |
| C | -2.40465000 | -1.10685500 | 3.23977300  |
| C | -2.90818100 | -2.53328000 | 3.28262700  |
| H | -3.17206300 | -0.40934000 | 2.88681300  |
| H | -2.06645900 | -0.75849900 | 4.21919200  |
| H | -3.75662100 | -2.60771200 | 3.96682400  |
| H | -3.23087600 | -2.86399000 | 2.29161500  |
| H | -2.12099300 | -3.20614700 | 3.63021100  |
| C | -0.10401100 | 1.60976300  | -0.90780200 |
| O | 0.92869900  | 1.46279300  | -1.59233800 |
| C | -0.53051600 | 3.01318900  | -0.57030000 |
| C | -0.04240800 | 4.04980300  | -1.37186500 |
| C | -1.36734200 | 3.32123800  | 0.50713100  |
| C | -0.40231300 | 5.36862900  | -1.12052100 |
| H | 0.61896900  | 3.79357600  | -2.19261100 |
| C | -1.71492600 | 4.64411800  | 0.76693200  |

---

|   |              |              |              |
|---|--------------|--------------|--------------|
| H | -1. 71678300 | 2. 53822000  | 1. 17176900  |
| C | -1. 24134100 | 5. 66901500  | -0. 04858600 |
| H | -0. 02774200 | 6. 16384100  | -1. 75780100 |
| H | -2. 35303900 | 4. 87500600  | 1. 61416500  |
| H | -1. 51970000 | 6. 69874300  | 0. 15387900  |
| C | -0. 84837700 | 0. 49526300  | -0. 38342600 |
| C | -0. 68793400 | -0. 84510500 | -1. 04965800 |
| H | -1. 83973100 | 0. 72548500  | 0. 00099100  |
| H | -0. 07042200 | -0. 70101200 | -1. 94265700 |
| C | -1. 99497800 | -1. 47434800 | -1. 46869300 |
| C | -2. 20404700 | -1. 90000100 | -2. 78173600 |
| C | -3. 01489100 | -1. 68870400 | -0. 53359700 |
| C | -3. 39698100 | -2. 51648400 | -3. 15517100 |
| H | -1. 42339300 | -1. 74144600 | -3. 52143100 |
| C | -4. 20823400 | -2. 30056300 | -0. 90116200 |
| H | -2. 85957500 | -1. 36788200 | 0. 49377900  |
| C | -4. 40438200 | -2. 71899200 | -2. 21660400 |
| H | -3. 53919200 | -2. 83659800 | -4. 18298600 |
| H | -4. 98755400 | -2. 45159400 | -0. 15967400 |
| H | -5. 33450700 | -3. 19757000 | -2. 50618600 |
| N | 2. 48334600  | -0. 96606100 | 0. 24221800  |
| C | 3. 19703400  | 0. 27971200  | 0. 69415500  |
| C | 3. 20384200  | -2. 15113700 | 0. 84237700  |
| C | 2. 65665000  | -1. 04310100 | -1. 26584700 |
| C | 4. 71832200  | 0. 10140400  | 0. 47891800  |
| H | 2. 95227900  | 0. 42852800  | 1. 74637500  |
| H | 2. 77523600  | 1. 09481800  | 0. 09992700  |
| C | 4. 62239700  | -2. 25743300 | 0. 23734500  |
| H | 2. 58786600  | -3. 02717900 | 0. 63703200  |
| H | 3. 20454000  | -1. 98055600 | 1. 92052800  |
| C | 4. 15102600  | -0. 84533900 | -1. 61344600 |
| H | 2. 01701100  | -0. 26577800 | -1. 68561400 |
| H | 2. 30424300  | -2. 02966200 | -1. 56831300 |
| H | 5. 13801800  | 1. 02087500  | 0. 06345700  |
| H | 5. 22335800  | -0. 09743600 | 1. 42837400  |
| N | 4. 99543200  | -1. 00964100 | -0. 42977000 |
| H | 5. 34801500  | -2. 47674300 | 1. 02526600  |
| H | 4. 67385100  | -3. 06559700 | -0. 49758400 |
| H | 4. 45519500  | -1. 56733000 | -2. 37606000 |
| H | 4. 31963200  | 0. 15697700  | -2. 01669500 |

**P'**

|   |              |              |             |
|---|--------------|--------------|-------------|
| C | 0. 62532300  | -1. 01826100 | 0. 26427000 |
| C | -0. 77379100 | -1. 53623700 | 0. 41274100 |
| C | 1. 72100000  | -1. 79437700 | 0. 22854500 |
| H | -1. 12750200 | -1. 27047900 | 1. 41778100 |
| H | -0. 78585200 | -2. 62407800 | 0. 32706800 |
| H | 1. 59851000  | -2. 86707400 | 0. 30195200 |

---

|   |             |             |             |
|---|-------------|-------------|-------------|
| C | 3.09469100  | -1.28372400 | 0.09883100  |
| O | 3.44829300  | -0.12892200 | -0.00714000 |
| O | 3.96991800  | -2.31155500 | 0.10579300  |
| C | 5.34928000  | -1.94475000 | -0.02399500 |
| C | 6.15967000  | -3.22156800 | 0.02221700  |
| H | 5.61350300  | -1.26082700 | 0.78820500  |
| H | 5.48646900  | -1.40591700 | -0.96657400 |
| H | 7.22305800  | -2.99195000 | -0.07708000 |
| H | 6.00350800  | -3.74142300 | 0.97010000  |
| H | 5.87098900  | -3.88956200 | -0.79238400 |
| C | -0.30438800 | 1.11763700  | -0.16486000 |
| O | 0.75757000  | 0.32737800  | 0.22915000  |
| C | 0.06349000  | 2.54636000  | -0.10026400 |
| C | -0.91968300 | 3.54097100  | -0.06261400 |
| C | 1.41480500  | 2.91159500  | -0.07871700 |
| C | -0.55884200 | 4.88213500  | -0.02828400 |
| H | -1.96927800 | 3.26408500  | -0.03910900 |
| C | 1.76850500  | 4.25699800  | -0.04077100 |
| H | 2.17423400  | 2.13524900  | -0.09464500 |
| C | 0.78722400  | 5.24434200  | -0.01941600 |
| H | -1.32925500 | 5.64586700  | 0.00515100  |
| H | 2.81790900  | 4.53375400  | -0.02851000 |
| H | 1.06807900  | 6.29223900  | 0.01207200  |
| C | -1.45788300 | 0.60407700  | -0.60296900 |
| C | -1.71828200 | -0.87896800 | -0.61081700 |
| H | -2.22185400 | 1.27389300  | -0.98024200 |
| H | -1.48944000 | -1.28214400 | -1.60730800 |
| C | -3.15868800 | -1.22654900 | -0.28881900 |
| C | -3.81101200 | -2.25212000 | -0.97390500 |
| C | -3.83829800 | -0.55905900 | 0.73406000  |
| C | -5.11769300 | -2.60617400 | -0.64585700 |
| H | -3.29128000 | -2.77489900 | -1.77303900 |
| C | -5.14336200 | -0.91038900 | 1.06419000  |
| H | -3.33692600 | 0.24400200  | 1.26957600  |
| C | -5.78731300 | -1.93556500 | 0.37408800  |
| H | -5.61348300 | -3.40402900 | -1.18970000 |
| H | -5.65968000 | -0.38229100 | 1.85962900  |
| H | -6.80648100 | -2.20786100 | 0.62871800  |

### M3''<sub>D</sub>

|   |             |             |             |
|---|-------------|-------------|-------------|
| C | -0.48815300 | 0.73037200  | -0.68571600 |
| C | 0.78291000  | 0.48958500  | -1.48661700 |
| C | -0.44502700 | -0.23275700 | 0.47814200  |
| H | 1.69452400  | 1.00390200  | -1.12466000 |
| H | 0.68026400  | 0.74949400  | -2.54923700 |
| H | -1.40265400 | -0.36353500 | 0.99040200  |
| C | 0.57555300  | -0.18583800 | 1.61951900  |
| O | 0.42223100  | -0.74627300 | 2.68538800  |



---

|   |              |              |              |
|---|--------------|--------------|--------------|
| O | 1. 69819500  | 0. 47925700  | 1. 30919500  |
| C | 2. 77282100  | 0. 41047900  | 2. 25617500  |
| C | 3. 98855100  | 1. 00303100  | 1. 57895900  |
| H | 2. 93179300  | -0. 63590300 | 2. 53193400  |
| H | 2. 48547300  | 0. 95798100  | 3. 16008400  |
| H | 4. 85170500  | 0. 95622000  | 2. 24748100  |
| H | 4. 21788400  | 0. 44191600  | 0. 66842400  |
| H | 3. 81282000  | 2. 04957100  | 1. 31454700  |
| C | -1. 35930600 | -1. 94227700 | -1. 11430900 |
| O | -1. 37027500 | -2. 09672700 | -2. 31934500 |
| C | -2. 59250600 | -2. 28593100 | -0. 31978000 |
| C | -3. 80309500 | -2. 38849400 | -1. 01093700 |
| C | -2. 55806000 | -2. 57305900 | 1. 04924800  |
| C | -4. 96628300 | -2. 75459900 | -0. 34510000 |
| H | -3. 80550000 | -2. 17985400 | -2. 07561800 |
| C | -3. 72154200 | -2. 95389000 | 1. 71265000  |
| H | -1. 62889400 | -2. 49614500 | 1. 60702000  |
| C | -4. 92587100 | -3. 04023200 | 1. 01928600  |
| H | -5. 90377300 | -2. 82346100 | -0. 88771300 |
| H | -3. 68595700 | -3. 18175100 | 2. 77297900  |
| H | -5. 83215500 | -3. 33202600 | 1. 54081200  |
| C | -0. 10693200 | -1. 50381200 | -0. 35267400 |
| C | 0. 99716800  | -1. 05296500 | -1. 33036000 |
| H | 0. 19005500  | -2. 35031000 | 0. 27844000  |
| H | 0. 78921700  | -1. 53048200 | -2. 29209300 |
| C | 2. 42561200  | -1. 41983300 | -0. 96213100 |
| C | 3. 44340300  | -1. 02237500 | -1. 84023000 |
| C | 2. 79872600  | -2. 13945200 | 0. 17551000  |
| C | 4. 77771800  | -1. 32619200 | -1. 59482600 |
| H | 3. 17436300  | -0. 46363000 | -2. 73384700 |
| C | 4. 13638200  | -2. 44633200 | 0. 42935000  |
| H | 2. 05415200  | -2. 45637800 | 0. 90051800  |
| C | 5. 13275800  | -2. 04343600 | -0. 45248300 |
| H | 5. 54172000  | -1. 00462100 | -2. 29630900 |
| H | 4. 39460900  | -3. 00243400 | 1. 32584200  |
| H | 6. 17257900  | -2. 28313100 | -0. 25451900 |
| N | -0. 75474700 | 2. 17940200  | -0. 36238300 |
| C | -2. 13633400 | 2. 29712300  | 0. 21460700  |
| C | 0. 19095200  | 2. 88665800  | 0. 58535000  |
| C | -0. 74092700 | 2. 94491600  | -1. 65772100 |
| C | -2. 41577900 | 3. 76852700  | 0. 60042600  |
| H | -2. 18211300 | 1. 63230700  | 1. 07794700  |
| H | -2. 80448300 | 1. 90348800  | -0. 55262300 |
| C | -0. 12473300 | 4. 40179600  | 0. 59133100  |
| H | 1. 20566100  | 2. 65620500  | 0. 26000300  |
| H | 0. 03640400  | 2. 43214400  | 1. 56611800  |
| C | -1. 35397000 | 4. 34570000  | -1. 44099500 |
| H | -1. 29089800 | 2. 32551800  | -2. 36804100 |

---

|   |             |            |             |
|---|-------------|------------|-------------|
| H | 0.30289100  | 2.99543300 | -1.97351200 |
| H | -3.41750300 | 4.05819700 | 0.27176400  |
| H | -2.37001600 | 3.90563700 | 1.68465300  |
| N | -1.43253700 | 4.66362900 | -0.01385500 |
| H | -0.12265100 | 4.78348300 | 1.61603200  |
| H | 0.62847400  | 4.95932100 | 0.02680800  |
| H | -0.74821300 | 5.10376500 | -1.94479000 |
| H | -2.36420400 | 4.39752800 | -1.85713300 |

**NHC/B3LYP-D3**

|   |             |             |             |
|---|-------------|-------------|-------------|
| C | -0.67862600 | -1.62307500 | -0.00006900 |
| C | 0.67862600  | -1.62307500 | 0.00006900  |
| C | 0.00000000  | 0.56845800  | 0.00000000  |
| N | -1.06815100 | -0.28627100 | -0.00003900 |
| H | -1.36596000 | -2.45138600 | -0.00023700 |
| H | 1.36596000  | -2.45138600 | 0.00023700  |
| N | 1.06815100  | -0.28627100 | 0.00003900  |
| C | -2.46884600 | 0.22085300  | -0.00000500 |
| C | -3.45686700 | -0.94883600 | -0.00023700 |
| C | -2.66862400 | 1.07236300  | 1.26213800  |
| C | -2.66845700 | 1.07281600  | -1.26188400 |
| H | -3.34206600 | -1.57447300 | -0.89011100 |
| H | -3.34222900 | -1.57467700 | 0.88951700  |
| H | -4.47461500 | -0.55084000 | -0.00031100 |
| H | -1.93548900 | 1.88072000  | 1.28633200  |
| H | -3.67567700 | 1.49988000  | 1.27586700  |
| H | -2.53881400 | 0.46113900  | 2.16077700  |
| H | -3.67524600 | 1.50095900  | -1.27525200 |
| H | -1.93478200 | 1.88068600  | -1.28588700 |
| H | -2.53922800 | 0.46179200  | -2.16074100 |
| C | 2.46884600  | 0.22085300  | 0.00000500  |
| C | 2.66862400  | 1.07236500  | -1.26213700 |
| C | 2.66845700  | 1.07281400  | 1.26188500  |
| C | 3.45686700  | -0.94883600 | 0.00023500  |
| H | 2.53881400  | 0.46114200  | -2.16077600 |
| H | 1.93548900  | 1.88072200  | -1.28633000 |
| H | 3.67567700  | 1.49988200  | -1.27586500 |
| H | 2.53922800  | 0.46178800  | 2.16074100  |
| H | 3.67524600  | 1.50095700  | 1.27525400  |
| H | 1.93478200  | 1.88068400  | 1.28588900  |
| H | 4.47461500  | -0.55084000 | 0.00030900  |
| H | 3.34206700  | -1.57447400 | 0.89010900  |
| H | 3.34222900  | -1.57467600 | -0.88951900 |

**R1/B3LYP-D3**

|   |             |             |             |
|---|-------------|-------------|-------------|
| C | -2.51071000 | -0.40575500 | 0.00008700  |
| C | -3.75723900 | -0.03305300 | 0.00033600  |
| C | -1.25184700 | -0.78376600 | -0.00021200 |

---

|   |             |             |             |
|---|-------------|-------------|-------------|
| H | -4.29694600 | 0.12967800  | 0.93008100  |
| H | -4.29736500 | 0.12951800  | -0.92919300 |
| H | -0.98269000 | -1.83636500 | -0.00033000 |
| C | -0.14866500 | 0.20618400  | -0.00048500 |
| O | -0.27381300 | 1.41819900  | -0.00000200 |
| O | 1.04169000  | -0.42565300 | -0.00032500 |
| C | 2.21412300  | 0.42606100  | -0.00001800 |
| C | 3.42975400  | -0.47690900 | 0.00040400  |
| H | 2.17899100  | 1.06897100  | 0.88412600  |
| H | 2.17952400  | 1.06885100  | -0.88427300 |
| H | 4.33826900  | 0.13193400  | 0.00061800  |
| H | 3.44209300  | -1.11469500 | 0.88855000  |
| H | 3.44260700  | -1.11483400 | -0.88763500 |

### R2/B3LYP-D3

|   |             |             |             |
|---|-------------|-------------|-------------|
| C | 1.18232300  | -0.96986900 | -0.03449800 |
| O | 1.18184000  | -2.20427600 | -0.08021400 |
| C | 2.48109000  | -0.22568100 | -0.01749800 |
| C | 2.57931500  | 1.15238200  | -0.26524500 |
| C | 3.65288400  | -0.95650700 | 0.23706800  |
| C | 3.82290400  | 1.78304800  | -0.25496300 |
| H | 1.69589100  | 1.73823900  | -0.49002300 |
| C | 4.89170100  | -0.32518900 | 0.25872200  |
| H | 3.56495400  | -2.02162100 | 0.41861600  |
| C | 4.97923000  | 1.04844500  | 0.01209300  |
| H | 3.88824300  | 2.84739500  | -0.45641000 |
| H | 5.78948200  | -0.89892800 | 0.46586200  |
| H | 5.94547500  | 1.54293700  | 0.02603600  |
| C | -0.07741600 | -0.20094100 | 0.02299200  |
| C | -1.26566800 | -0.83219200 | -0.06992900 |
| H | -0.02480500 | 0.87146200  | 0.16217700  |
| H | -1.23163200 | -1.91224900 | -0.20049900 |
| C | -2.59627100 | -0.23746500 | -0.01569500 |
| C | -3.71465500 | -1.08172900 | -0.14407800 |
| C | -2.81488900 | 1.14321000  | 0.16155800  |
| C | -5.00873800 | -0.56860900 | -0.09794500 |
| H | -3.55791400 | -2.14775700 | -0.28047400 |
| C | -4.10660700 | 1.65428200  | 0.20772300  |
| H | -1.97143100 | 1.81769000  | 0.26351000  |
| C | -5.20848200 | 0.80136100  | 0.07834400  |
| H | -5.85894600 | -1.23550900 | -0.19880300 |
| H | -4.25911900 | 2.72005400  | 0.34496000  |
| H | -6.21523600 | 1.20520900  | 0.11485700  |

### TS1/B3LYP-D3

|   |             |            |             |
|---|-------------|------------|-------------|
| C | -1.11008300 | 1.80967000 | -1.35762600 |
| C | -2.24052400 | 1.06322500 | -1.39317200 |
| C | -1.07516600 | 0.44740200 | 0.46671600  |

---

|   |             |             |             |
|---|-------------|-------------|-------------|
| N | -0.42005500 | 1.43626900  | -0.21012000 |
| H | -0.77058700 | 2.57943400  | -2.03044800 |
| H | -3.04471100 | 1.06955600  | -2.10803300 |
| N | -2.21904600 | 0.25362100  | -0.26209300 |
| C | 0.81136600  | 2.14903100  | 0.23495600  |
| C | 0.44074200  | 3.62409500  | 0.46895100  |
| C | 1.33361500  | 1.54855300  | 1.54069300  |
| C | 1.87708600  | 2.03262200  | -0.86574300 |
| H | 0.06522100  | 4.09836700  | -0.44164700 |
| H | -0.32785800 | 3.70568600  | 1.24296400  |
| H | 1.32426600  | 4.17855700  | 0.79739600  |
| H | 1.67295500  | 0.52393900  | 1.40326200  |
| H | 2.17886800  | 2.15427900  | 1.88030400  |
| H | 0.56153800  | 1.56193800  | 2.31289400  |
| H | 2.79963500  | 2.51807700  | -0.53561800 |
| H | 2.09528700  | 0.98618000  | -1.07961800 |
| H | 1.55717600  | 2.51795300  | -1.79186200 |
| C | -3.32164600 | -0.68151900 | 0.11317100  |
| C | -3.03381700 | -2.07950300 | -0.45478000 |
| C | -3.43165300 | -0.73023800 | 1.64178400  |
| C | -4.64432900 | -0.15467300 | -0.46428600 |
| H | -2.87061800 | -2.03062000 | -1.53550100 |
| H | -2.15438400 | -2.51927100 | 0.01701900  |
| H | -3.88745700 | -2.73752600 | -0.26750300 |
| H | -3.62003600 | 0.26806000  | 2.04653500  |
| H | -4.26640900 | -1.38038900 | 1.91886400  |
| H | -2.52100600 | -1.12334600 | 2.09049100  |
| H | -5.46348400 | -0.76755600 | -0.08079000 |
| H | -4.82177800 | 0.88195800  | -0.16455000 |
| H | -4.67471200 | -0.21731800 | -1.55510600 |
| C | 0.06776400  | -1.45805200 | 0.78849800  |
| C | -0.00527100 | -1.69079400 | 2.08180300  |
| C | 0.49139400  | -1.79581900 | -0.45022700 |
| H | 0.32768000  | -2.65483000 | 2.46172200  |
| H | -0.37088000 | -0.95691400 | 2.78630400  |
| H | -0.22010300 | -2.07289900 | -1.22074600 |
| C | 1.85617000  | -1.64792200 | -0.91059800 |
| O | 2.23567500  | -1.87982000 | -2.05642900 |
| O | 2.71840100  | -1.23176600 | 0.06208800  |
| C | 4.08940500  | -1.04914200 | -0.34049300 |
| C | 4.82611200  | -0.43175800 | 0.83121100  |
| H | 4.12423500  | -0.40540800 | -1.22442300 |
| H | 4.51277300  | -2.01919300 | -0.62121800 |
| H | 5.88084900  | -0.29420300 | 0.57579800  |
| H | 4.40160200  | 0.54344100  | 1.08517500  |
| H | 4.76604700  | -1.07554900 | 1.71340300  |

**M1/B3LYP-D3**

---

|   |              |              |              |
|---|--------------|--------------|--------------|
| C | 2. 91271300  | 1. 33162900  | 0. 08100300  |
| C | 3. 27846200  | 0. 02944200  | 0. 13357200  |
| C | 1. 06659000  | 0. 10185600  | -0. 14839200 |
| N | 1. 53927500  | 1. 37575800  | -0. 09850700 |
| H | 3. 52108600  | 2. 21309200  | 0. 15303200  |
| H | 4. 25497400  | -0. 39945400 | 0. 25392000  |
| N | 2. 12951700  | -0. 73355700 | -0. 00308700 |
| C | 0. 76532700  | 2. 68250400  | -0. 09171200 |
| C | 1. 71784600  | 3. 80406100  | -0. 53498300 |
| C | -0. 41907200 | 2. 64157700  | -1. 06431800 |
| C | 0. 28736300  | 2. 93565500  | 1. 34419700  |
| H | 2. 50327000  | 4. 00328300  | 0. 19734300  |
| H | 2. 17477900  | 3. 58480900  | -1. 50386500 |
| H | 1. 13394400  | 4. 72101600  | -0. 63462700 |
| H | -1. 19492800 | 1. 95625300  | -0. 73328400 |
| H | -0. 83996800 | 3. 64934900  | -1. 11105500 |
| H | -0. 09718400 | 2. 35490000  | -2. 06780200 |
| H | -0. 20130200 | 3. 91279800  | 1. 39227700  |
| H | -0. 42712200 | 2. 16836500  | 1. 64631200  |
| H | 1. 13159900  | 2. 93865700  | 2. 03957800  |
| C | 2. 13602600  | -2. 25076700 | -0. 00805200 |
| C | 1. 07831900  | -2. 77819500 | 0. 96854900  |
| C | 1. 88549500  | -2. 74293500 | -1. 43919600 |
| C | 3. 51525300  | -2. 73620000 | 0. 45904200  |
| H | 1. 27094200  | -2. 40802800 | 1. 97939000  |
| H | 0. 07009300  | -2. 48814400 | 0. 68119000  |
| H | 1. 14065800  | -3. 86944200 | 0. 98409000  |
| H | 2. 61431000  | -2. 30646800 | -2. 12831500 |
| H | 1. 99553200  | -3. 83056200 | -1. 46566900 |
| H | 0. 88087000  | -2. 47969700 | -1. 76989400 |
| H | 3. 47884800  | -3. 82562300 | 0. 52031400  |
| H | 4. 30935000  | -2. 47648300 | -0. 24534700 |
| H | 3. 76870900  | -2. 35229000 | 1. 45073800  |
| C | -0. 36255600 | -0. 29029000 | -0. 31723100 |
| C | -0. 73188100 | -0. 59609800 | -1. 59585300 |
| C | -1. 10922000 | -0. 22187200 | 0. 90282200  |
| H | -1. 75460300 | -0. 85021500 | -1. 83349000 |
| H | -0. 01970100 | -0. 50987100 | -2. 40769800 |
| H | -0. 55058000 | -0. 09684600 | 1. 82255800  |
| C | -2. 50467200 | -0. 33288200 | 1. 08543500  |
| O | -3. 11468700 | -0. 28715000 | 2. 16930000  |
| O | -3. 21980000 | -0. 49011100 | -0. 09813000 |
| C | -4. 64151200 | -0. 56272200 | 0. 04020400  |
| C | -5. 22621100 | -0. 75461100 | -1. 34726900 |
| H | -5. 01881500 | 0. 35489300  | 0. 50666000  |
| H | -4. 90971100 | -1. 39227000 | 0. 70406600  |
| H | -6. 31789600 | -0. 80944500 | -1. 29344500 |
| H | -4. 95502100 | 0. 07922700  | -2. 00192400 |

---

|                     |             |             |             |
|---------------------|-------------|-------------|-------------|
| H                   | -4.85740700 | -1.68003600 | -1.80016900 |
| <b>TS2/B3LYP-D3</b> |             |             |             |
| C                   | 3.41022500  | -2.94111700 | -0.85828400 |
| C                   | 4.11706300  | -2.17469500 | 0.00290200  |
| C                   | 2.02973300  | -1.37805000 | -0.05776400 |
| N                   | 2.11928100  | -2.45000900 | -0.89496400 |
| H                   | 3.73223400  | -3.78762200 | -1.43278100 |
| H                   | 5.14821200  | -2.25269400 | 0.28813900  |
| N                   | 3.26400400  | -1.21211200 | 0.50842500  |
| C                   | 1.04613100  | -3.06250400 | -1.77730100 |
| C                   | 1.66537300  | -4.21144200 | -2.58508700 |
| C                   | -0.07804500 | -3.62530900 | -0.89810200 |
| C                   | 0.55352300  | -1.98485300 | -2.74326600 |
| H                   | 2.47846700  | -3.87416900 | -3.23334300 |
| H                   | 2.02027200  | -5.02543300 | -1.94747500 |
| H                   | 0.87946500  | -4.61530900 | -3.22571900 |
| H                   | -0.68577600 | -2.83408400 | -0.46791200 |
| H                   | -0.73416400 | -4.23613700 | -1.52306800 |
| H                   | 0.33879600  | -4.26267800 | -0.11274700 |
| H                   | -0.12198200 | -2.44041000 | -3.47097300 |
| H                   | -0.01438400 | -1.22582700 | -2.21731000 |
| H                   | 1.39509300  | -1.53623600 | -3.27886900 |
| C                   | 3.76352400  | -0.15515400 | 1.48158700  |
| C                   | 4.08236800  | 1.11542100  | 0.68329300  |
| C                   | 2.74877500  | 0.09171400  | 2.60303500  |
| C                   | 5.05644300  | -0.67143300 | 2.13655600  |
| H                   | 4.80940100  | 0.89509700  | -0.10342700 |
| H                   | 3.19614800  | 1.55830600  | 0.23387300  |
| H                   | 4.52322700  | 1.85544800  | 1.35709500  |
| H                   | 2.49368500  | -0.84547100 | 3.10455400  |
| H                   | 3.21484300  | 0.75621500  | 3.33439700  |
| H                   | 1.83255800  | 0.55968600  | 2.26297500  |
| H                   | 5.34522200  | 0.04617800  | 2.90658900  |
| H                   | 4.90892600  | -1.64214700 | 2.61707100  |
| H                   | 5.88927000  | -0.73657800 | 1.43331200  |
| C                   | 0.82630500  | -0.55121000 | 0.26174100  |
| C                   | -0.01111200 | -1.03004500 | 1.20459900  |
| C                   | 0.71096700  | 0.78076300  | -0.37757400 |
| H                   | -0.83728100 | -0.43788900 | 1.56297200  |
| H                   | 0.15121600  | -2.00373700 | 1.65270800  |
| H                   | 1.41106600  | 0.92407300  | -1.19715900 |
| C                   | 0.71099900  | 1.98884000  | 0.46367800  |
| O                   | 1.32486900  | 3.01743500  | 0.20017600  |
| O                   | -0.10427800 | 1.89032000  | 1.54557300  |
| C                   | -0.24375000 | 3.07739200  | 2.36020100  |
| C                   | 0.87905900  | 3.20091000  | 3.37570500  |
| H                   | -1.21184800 | 2.95484800  | 2.85027900  |

---

|   |             |             |             |
|---|-------------|-------------|-------------|
| H | -0.28201100 | 3.94746900  | 1.70235800  |
| H | 0.71044100  | 4.07967800  | 4.00617200  |
| H | 0.92176600  | 2.31878700  | 4.02051300  |
| H | 1.84099900  | 3.31620400  | 2.87143800  |
| C | -2.65714500 | -0.79127400 | -0.59011600 |
| O | -2.38883200 | -1.55212300 | -1.56698000 |
| C | -3.65061200 | -1.30308600 | 0.43257900  |
| C | -4.41342400 | -2.43234200 | 0.10084900  |
| C | -3.82521700 | -0.73825500 | 1.70631700  |
| C | -5.33264000 | -2.97222300 | 0.99846100  |
| H | -4.25722400 | -2.87196600 | -0.87804300 |
| C | -4.74073900 | -1.27760100 | 2.61011400  |
| H | -3.23173600 | 0.11867300  | 2.00647000  |
| C | -5.50161800 | -2.39562800 | 2.25969500  |
| H | -5.91659500 | -3.84441000 | 0.71759800  |
| H | -4.85544000 | -0.82850400 | 3.59258100  |
| H | -6.21331700 | -2.81571200 | 2.96421000  |
| C | -2.12987800 | 0.50326300  | -0.41379300 |
| C | -1.09234600 | 1.00305900  | -1.25139700 |
| H | -2.49297100 | 1.11767600  | 0.39892300  |
| H | -0.89417800 | 0.34899300  | -2.09524700 |
| C | -1.06308600 | 2.43723100  | -1.66313100 |
| C | -0.32831900 | 2.81437600  | -2.79805900 |
| C | -1.74842800 | 3.43842000  | -0.95837700 |
| C | -0.27470000 | 4.14275500  | -3.21535700 |
| H | 0.20786700  | 2.05050300  | -3.35542800 |
| C | -1.69374100 | 4.76978300  | -1.36954800 |
| H | -2.33588600 | 3.17321100  | -0.08691300 |
| C | -0.95675800 | 5.12965300  | -2.49944800 |
| H | 0.29678900  | 4.40846700  | -4.09993200 |
| H | -2.23361600 | 5.52739900  | -0.80884500 |
| H | -0.91821300 | 6.16574500  | -2.82166000 |

### NHC/B3PW91-D3

|   |             |             |             |
|---|-------------|-------------|-------------|
| C | -0.67848200 | -1.61873100 | 0.00000600  |
| C | 0.67848200  | -1.61873100 | -0.00000600 |
| C | 0.00000000  | 0.56711900  | 0.00000000  |
| N | -1.06419200 | -0.28670400 | 0.00001900  |
| H | -1.36659500 | -2.44753600 | 0.00002400  |
| H | 1.36659500  | -2.44753600 | -0.00002400 |
| N | 1.06419200  | -0.28670400 | -0.00001900 |
| C | -2.45793600 | 0.21961300  | -0.00000200 |
| C | -3.44471600 | -0.94435500 | 0.00013900  |
| C | -2.65362200 | 1.06936900  | 1.25764500  |
| C | -2.65367000 | 1.06912000  | -1.25781000 |
| H | -3.33199100 | -1.57012300 | -0.89024600 |
| H | -3.33190400 | -1.56996700 | 0.89062100  |
| H | -4.46158100 | -0.54380200 | 0.00014900  |

---

|   |              |              |              |
|---|--------------|--------------|--------------|
| H | -1. 91536600 | 1. 87382400  | 1. 27919600  |
| H | -3. 65851400 | 1. 50197700  | 1. 27132700  |
| H | -2. 52580400 | 0. 45811600  | 2. 15660200  |
| H | -3. 65857800 | 1. 50169000  | -1. 27156400 |
| H | -1. 91544700 | 1. 87360200  | -1. 27952700 |
| H | -2. 52584100 | 0. 45769600  | -2. 15664800 |
| C | 2. 45793600  | 0. 21961300  | 0. 00000200  |
| C | 2. 65362200  | 1. 06936700  | -1. 25764600 |
| C | 2. 65367000  | 1. 06912200  | 1. 25780900  |
| C | 3. 44471600  | -0. 94435500 | -0. 00013800 |
| H | 2. 52580400  | 0. 45811400  | -2. 15660200 |
| H | 1. 91536600  | 1. 87382300  | -1. 27919700 |
| H | 3. 65851400  | 1. 50197600  | -1. 27132800 |
| H | 2. 52584100  | 0. 45769800  | 2. 15664800  |
| H | 3. 65857800  | 1. 50169100  | 1. 27156300  |
| H | 1. 91544700  | 1. 87360300  | 1. 27952500  |
| H | 4. 46158100  | -0. 54380200 | -0. 00014800 |
| H | 3. 33199100  | -1. 57012200 | 0. 89024800  |
| H | 3. 33190400  | -1. 56996800 | -0. 89062000 |

**R1/B3PW91-D3**

|   |              |              |              |
|---|--------------|--------------|--------------|
| C | -2. 50428200 | -0. 40411600 | 0. 00011500  |
| C | -3. 74956100 | -0. 02923500 | 0. 00040800  |
| C | -1. 24665000 | -0. 78466100 | -0. 00024800 |
| H | -4. 28747600 | 0. 13425400  | 0. 93124100  |
| H | -4. 28805400 | 0. 13379900  | -0. 93017000 |
| H | -0. 98118900 | -1. 83861900 | -0. 00038800 |
| C | -0. 14576500 | 0. 20337700  | -0. 00060500 |
| O | -0. 27055500 | 1. 41353400  | -0. 00002100 |
| O | 1. 03975700  | -0. 42748300 | -0. 00038200 |
| C | 2. 20403300  | 0. 42367300  | -0. 00001300 |
| C | 3. 42024800  | -0. 47159200 | 0. 00048600  |
| H | 2. 16760400  | 1. 06753000  | 0. 88396800  |
| H | 2. 16824000  | 1. 06739700  | -0. 88412000 |
| H | 4. 32605000  | 0. 14098200  | 0. 00074700  |
| H | 3. 43622600  | -1. 10913600 | 0. 88864000  |
| H | 3. 43684300  | -1. 10928800 | -0. 88754800 |

**R2/B3PW91-D3**

|   |             |              |              |
|---|-------------|--------------|--------------|
| C | 1. 17947100 | -0. 96703000 | -0. 03937800 |
| O | 1. 17786000 | -2. 19866600 | -0. 08959300 |
| C | 2. 47562200 | -0. 22509000 | -0. 01932700 |
| C | 2. 57610100 | 1. 14782500  | -0. 28172300 |
| C | 3. 64193600 | -0. 95407600 | 0. 25219100  |
| C | 3. 81870200 | 1. 77626300  | -0. 26894400 |
| H | 1. 69430100 | 1. 73175600  | -0. 52155400 |
| C | 4. 87970700 | -0. 32465000 | 0. 27748600  |
| H | 3. 54987400 | -2. 01781600 | 0. 44451200  |



---

|   |             |             |             |
|---|-------------|-------------|-------------|
| C | 4.97023600  | 1.04421500  | 0.01626200  |
| H | 3.88742100  | 2.83834100  | -0.48289800 |
| H | 5.77549500  | -0.89681300 | 0.49905700  |
| H | 5.93715900  | 1.53817600  | 0.03275200  |
| C | -0.07570200 | -0.19656900 | 0.02231600  |
| C | -1.26211100 | -0.82836400 | -0.07583900 |
| H | -0.02225300 | 0.87555800  | 0.17036100  |
| H | -1.22442800 | -1.90827300 | -0.21417800 |
| C | -2.59051200 | -0.23617000 | -0.01757800 |
| C | -3.70658500 | -1.07978200 | -0.14881100 |
| C | -2.80888300 | 1.14143400  | 0.16666800  |
| C | -4.99926700 | -0.56842300 | -0.09820800 |
| H | -3.54914800 | -2.14548500 | -0.29097000 |
| C | -4.09919300 | 1.65076100  | 0.21715400  |
| H | -1.96558700 | 1.81665800  | 0.27082700  |
| C | -5.19908900 | 0.79877500  | 0.08521600  |
| H | -5.84955200 | -1.23548700 | -0.20128400 |
| H | -4.25233000 | 2.71608500  | 0.35995700  |
| H | -6.20641900 | 1.20191800  | 0.12526200  |

**TS1/B3PW91-D3**

|   |             |             |             |
|---|-------------|-------------|-------------|
| C | -1.03564600 | 1.72890300  | -1.39968000 |
| C | -2.16993200 | 0.98788100  | -1.43731100 |
| C | -1.08431500 | 0.47422500  | 0.49609400  |
| N | -0.39917100 | 1.41646600  | -0.21069400 |
| H | -0.66553100 | 2.46004300  | -2.10042000 |
| H | -2.94671800 | 0.95656700  | -2.18280200 |
| N | -2.19735900 | 0.25091200  | -0.26441600 |
| C | 0.80913500  | 2.14001800  | 0.25098800  |
| C | 0.41569900  | 3.60400000  | 0.48191100  |
| C | 1.31591300  | 1.53726800  | 1.55534900  |
| C | 1.89238400  | 2.04157200  | -0.82631400 |
| H | 0.03972400  | 4.06893700  | -0.43404300 |
| H | -0.36224000 | 3.67210400  | 1.24802400  |
| H | 1.28617400  | 4.17451400  | 0.81828900  |
| H | 1.65705700  | 0.51242700  | 1.41174900  |
| H | 2.15636300  | 2.14174200  | 1.90893100  |
| H | 0.53374000  | 1.54118600  | 2.31743700  |
| H | 2.80487300  | 2.52930400  | -0.47275800 |
| H | 2.12137500  | 0.99809100  | -1.04506700 |
| H | 1.59113300  | 2.53380900  | -1.75499900 |
| C | -3.30982600 | -0.65737900 | 0.11228300  |
| C | -3.05028400 | -2.05479300 | -0.45643000 |
| C | -3.41111400 | -0.70908800 | 1.63551800  |
| C | -4.61962000 | -0.10249000 | -0.45552400 |
| H | -2.89352900 | -2.00966800 | -1.53845700 |
| H | -2.17315300 | -2.50600900 | 0.01116500  |
| H | -3.91190800 | -2.70041000 | -0.26257900 |

---

|   |             |             |             |
|---|-------------|-------------|-------------|
| H | -3.57736900 | 0.29085700  | 2.04582400  |
| H | -4.25593500 | -1.34541300 | 1.91464600  |
| H | -2.50311900 | -1.12060900 | 2.07480900  |
| H | -5.45158700 | -0.69645300 | -0.06890000 |
| H | -4.77006100 | 0.93785500  | -0.15297400 |
| H | -4.65834500 | -0.16231700 | -1.54648600 |
| C | 0.06445500  | -1.47074600 | 0.79560900  |
| C | -0.01793000 | -1.70943900 | 2.08536300  |
| C | 0.46693700  | -1.76062900 | -0.45584800 |
| H | 0.28774900  | -2.68530000 | 2.45873300  |
| H | -0.36687600 | -0.96761600 | 2.79096400  |
| H | -0.25534200 | -2.00097300 | -1.22916800 |
| C | 1.83031100  | -1.60539600 | -0.91987200 |
| O | 2.19375500  | -1.78553500 | -2.07705200 |
| O | 2.69768700  | -1.24933700 | 0.06107400  |
| C | 4.06203100  | -1.06594500 | -0.34273900 |
| C | 4.80609400  | -0.47710700 | 0.83324200  |
| H | 4.09645400  | -0.40602400 | -1.21517400 |
| H | 4.47897400  | -2.03287100 | -0.64484300 |
| H | 5.85992000  | -0.33992900 | 0.57482700  |
| H | 4.38845500  | 0.49536100  | 1.10762800  |
| H | 4.74815900  | -1.13702700 | 1.70340500  |

### M1/B3PW91-D3

|   |             |             |             |
|---|-------------|-------------|-------------|
| C | 2.88887000  | 1.35784100  | 0.07586100  |
| C | 3.27170900  | 0.06088500  | 0.12713800  |
| C | 1.06393400  | 0.10580500  | -0.14807000 |
| N | 1.51951100  | 1.38194600  | -0.09879500 |
| H | 3.48593200  | 2.24835900  | 0.14550600  |
| H | 4.25461000  | -0.35650900 | 0.24481900  |
| N | 2.13573900  | -0.71251200 | -0.00614600 |
| C | 0.73007200  | 2.66784100  | -0.09114300 |
| C | 1.66281300  | 3.80266100  | -0.52420900 |
| C | -0.44537900 | 2.60949100  | -1.06520500 |
| C | 0.24223400  | 2.90789400  | 1.33816500  |
| H | 2.43833300  | 4.01570400  | 0.21533900  |
| H | 2.13061100  | 3.59428700  | -1.49060100 |
| H | 1.06307400  | 4.70932400  | -0.62654200 |
| H | -1.20805700 | 1.90545800  | -0.73941400 |
| H | -0.88682400 | 3.60875800  | -1.10782200 |
| H | -0.11420100 | 2.33451500  | -2.06923500 |
| H | -0.25943000 | 3.87836900  | 1.38779600  |
| H | -0.46502200 | 2.12868500  | 1.62974700  |
| H | 1.08200200  | 2.91762900  | 2.03905600  |
| C | 2.15670700  | -2.21967500 | -0.00652300 |
| C | 1.11518400  | -2.74874100 | 0.97824100  |
| C | 1.89659800  | -2.71817900 | -1.42814300 |
| C | 3.53959400  | -2.69008700 | 0.44700800  |

|   |             |             |             |
|---|-------------|-------------|-------------|
| H | 1.31863600  | -2.37892900 | 1.98721800  |
| H | 0.10294800  | -2.45751400 | 0.70123400  |
| H | 1.17798300  | -3.84003800 | 0.99181300  |
| H | 2.61406400  | -2.27845600 | -2.12713500 |
| H | 2.01434000  | -3.80508700 | -1.45149000 |
| H | 0.88503900  | -2.46246200 | -1.74681500 |
| H | 3.51233900  | -3.77984300 | 0.51159800  |
| H | 4.32492200  | -2.42709500 | -0.26662600 |
| H | 3.79948700  | -2.30226100 | 1.43590700  |
| C | -0.35591000 | -0.30319800 | -0.31417800 |
| C | -0.72014100 | -0.61447300 | -1.59225200 |
| C | -1.10001300 | -0.23908500 | 0.90397000  |
| H | -1.74098800 | -0.87948100 | -1.82989900 |
| H | -0.00795400 | -0.51526400 | -2.40355400 |
| H | -0.54160500 | -0.11165800 | 1.82429000  |
| C | -2.49490400 | -0.35257100 | 1.08242900  |
| O | -3.10610500 | -0.30497900 | 2.16282500  |
| O | -3.20056100 | -0.51305900 | -0.09758000 |
| C | -4.61679100 | -0.58156700 | 0.03787900  |
| C | -5.19863600 | -0.77097500 | -1.34661300 |
| H | -4.99291700 | 0.33688700  | 0.50437600  |
| H | -4.88896700 | -1.41047900 | 0.70160800  |
| H | -6.29032000 | -0.82323200 | -1.29438900 |
| H | -4.92508900 | 0.06244300  | -2.00064700 |
| H | -4.83202200 | -1.69705500 | -1.79964200 |

### TS2/B3PW91-D3

|   |             |             |             |
|---|-------------|-------------|-------------|
| C | 3.19995100  | -3.11644900 | -0.87502800 |
| C | 3.94947300  | -2.40356600 | -0.00406400 |
| C | 1.92839800  | -1.46540900 | -0.08463000 |
| N | 1.95352500  | -2.53482900 | -0.92239800 |
| H | 3.46541400  | -3.98285800 | -1.45112500 |
| H | 4.96996400  | -2.55329100 | 0.29400500  |
| N | 3.16228700  | -1.38781700 | 0.49098100  |
| C | 0.85403100  | -3.04681100 | -1.81631800 |
| C | 1.39259700  | -4.20809000 | -2.65257300 |
| C | -0.30309300 | -3.54927500 | -0.95456400 |
| C | 0.44603100  | -1.91150800 | -2.74579200 |
| H | 2.23566800  | -3.91144300 | -3.28291200 |
| H | 1.67716700  | -5.06767900 | -2.03925400 |
| H | 0.58546600  | -4.53073700 | -3.31329900 |
| H | -0.83068800 | -2.72626200 | -0.47848600 |
| H | -1.01884000 | -4.06689600 | -1.59731300 |
| H | 0.06361200  | -4.25578600 | -0.20388300 |
| H | -0.30612300 | -2.27391600 | -3.44891900 |
| H | -0.00978200 | -1.10323100 | -2.18303800 |
| H | 1.31164700  | -1.54570800 | -3.30571400 |
| C | 3.71749700  | -0.36449000 | 1.45356000  |

---

|   |             |             |             |
|---|-------------|-------------|-------------|
| C | 4.09732200  | 0.88168300  | 0.65391400  |
| C | 2.72481200  | -0.06168600 | 2.57417800  |
| C | 4.97996300  | -0.94430800 | 2.10152600  |
| H | 4.80375900  | 0.62120900  | -0.13946200 |
| H | 3.22999700  | 1.37061400  | 0.21295800  |
| H | 4.58293800  | 1.59799900  | 1.32245900  |
| H | 2.41825500  | -0.98292700 | 3.07691000  |
| H | 3.22992000  | 0.57574000  | 3.30395800  |
| H | 1.83462200  | 0.45803800  | 2.23498200  |
| H | 5.31061300  | -0.23987300 | 2.86723800  |
| H | 4.78372400  | -1.90359500 | 2.58840100  |
| H | 5.80533800  | -1.05590100 | 1.39432500  |
| C | 0.78491600  | -0.56608300 | 0.23611400  |
| C | -0.08181600 | -0.99555200 | 1.17813000  |
| C | 0.75614700  | 0.76653100  | -0.38901500 |
| H | -0.85692300 | -0.34510200 | 1.55153100  |
| H | 0.01713900  | -1.98150200 | 1.61917400  |
| H | 1.45610800  | 0.87885300  | -1.21445300 |
| C | 0.80642600  | 1.96717300  | 0.45128800  |
| O | 1.46759300  | 2.96572500  | 0.19367900  |
| O | -0.00933600 | 1.89989800  | 1.52968300  |
| C | -0.08576400 | 3.08341900  | 2.34348600  |
| C | 1.04146500  | 3.14731100  | 3.35299100  |
| H | -1.05791200 | 3.01173700  | 2.83637400  |
| H | -0.08170500 | 3.95663300  | 1.68736200  |
| H | 0.92424900  | 4.03460800  | 3.98288200  |
| H | 1.03863700  | 2.26550200  | 3.99958600  |
| H | 2.00663300  | 3.20935100  | 2.84524400  |
| C | -2.67235900 | -0.65898100 | -0.60764100 |
| O | -2.46707100 | -1.37697700 | -1.62411300 |
| C | -3.63407000 | -1.18736500 | 0.43101600  |
| C | -4.38108400 | -2.32661600 | 0.10711100  |
| C | -3.79622400 | -0.63084600 | 1.70762300  |
| C | -5.27211500 | -2.88748000 | 1.01734100  |
| H | -4.23191300 | -2.75628300 | -0.87829400 |
| C | -4.68514400 | -1.18941000 | 2.62313400  |
| H | -3.21553100 | 0.23761700  | 2.00210800  |
| C | -5.42940200 | -2.31927900 | 2.28184500  |
| H | -5.84420600 | -3.77009500 | 0.74343700  |
| H | -4.79259900 | -0.74518300 | 3.60898800  |
| H | -6.12104700 | -2.75512200 | 2.99724100  |
| C | -2.09781900 | 0.61268900  | -0.39964700 |
| C | -1.07070000 | 1.09550000  | -1.24660900 |
| H | -2.41793400 | 1.21358400  | 0.44221000  |
| H | -0.91019100 | 0.45092400  | -2.10804400 |
| C | -0.97191400 | 2.53265600  | -1.61075800 |
| C | -0.22363000 | 2.90794100  | -2.73527000 |
| C | -1.60468700 | 3.54130300  | -0.87230300 |

---

|   |             |            |             |
|---|-------------|------------|-------------|
| C | -0.10561900 | 4.24266000 | -3.10939100 |
| H | 0.27262000  | 2.13567600 | -3.31838000 |
| C | -1.48297700 | 4.87930100 | -1.23903300 |
| H | -2.20511600 | 3.27547200 | -0.00892500 |
| C | -0.73288500 | 5.23757100 | -2.35851100 |
| H | 0.47563100  | 4.50838600 | -3.98805000 |
| H | -1.98242000 | 5.64483100 | -0.65154300 |
| H | -0.64271400 | 6.28077400 | -2.64699600 |

**NHC/ $\omega$ B97X-D**

|   |             |             |             |
|---|-------------|-------------|-------------|
| C | -0.67610700 | -1.61596900 | -0.01448300 |
| C | 0.67610700  | -1.61596900 | 0.01448200  |
| C | 0.00000000  | 0.56606300  | -0.00000200 |
| N | -1.06479000 | -0.28408900 | -0.02873300 |
| H | -1.36381400 | -2.44468600 | -0.02878800 |
| H | 1.36381400  | -2.44468600 | 0.02878700  |
| N | 1.06479000  | -0.28409000 | 0.02872900  |
| C | -2.46053100 | 0.21972500  | 0.00168800  |
| C | -3.44725600 | -0.93001400 | -0.20912700 |
| C | -2.70125800 | 0.86992300  | 1.36914700  |
| C | -2.62880400 | 1.25040900  | -1.11957700 |
| H | -3.26789000 | -1.44341600 | -1.15857000 |
| H | -3.40515700 | -1.66117200 | 0.60339800  |
| H | -4.46062000 | -0.52158300 | -0.23392800 |
| H | -1.98115000 | 1.67558400  | 1.52975700  |
| H | -3.71368000 | 1.28092600  | 1.42467200  |
| H | -2.58156900 | 0.13224500  | 2.16871200  |
| H | -3.63539100 | 1.67721700  | -1.08695700 |
| H | -1.89567100 | 2.05081400  | -1.00777900 |
| H | -2.48123200 | 0.78006100  | -2.09662800 |
| C | 2.46053100  | 0.21972400  | -0.00168800 |
| C | 2.70125800  | 0.86993300  | -1.36914300 |
| C | 2.62880300  | 1.25040100  | 1.11958500  |
| C | 3.44725600  | -0.93001500 | 0.20911900  |
| H | 2.58157000  | 0.13226000  | -2.16871200 |
| H | 1.98114900  | 1.67559400  | -1.52974700 |
| H | 3.71368000  | 1.28093700  | -1.42466300 |
| H | 2.48123000  | 0.78004700  | 2.09663200  |
| H | 3.63539100  | 1.67720900  | 1.08696800  |
| H | 1.89567100  | 2.05080800  | 1.00779000  |
| H | 4.46062000  | -0.52158500 | 0.23392000  |
| H | 3.26789300  | -1.44342200 | 1.15856000  |
| H | 3.40515500  | -1.66116900 | -0.60340900 |

**R1/ $\omega$ B97X-D**

|   |             |             |             |
|---|-------------|-------------|-------------|
| C | -2.50193100 | -0.40447900 | 0.00000000  |
| C | -3.74543500 | -0.02628600 | -0.00003600 |
| C | -1.24745700 | -0.78978300 | 0.00002200  |

---

|   |             |             |             |
|---|-------------|-------------|-------------|
| H | -4.27841400 | 0.13743100  | 0.93192900  |
| H | -4.27826600 | 0.13775300  | -0.93202800 |
| H | -0.98713000 | -1.84366900 | -0.00000400 |
| C | -0.14540200 | 0.20133200  | 0.00006400  |
| O | -0.27669400 | 1.40810200  | 0.00007900  |
| O | 1.03969100  | -0.42045500 | -0.00005100 |
| C | 2.20364600  | 0.42651800  | -0.00010700 |
| C | 3.42001100  | -0.47250300 | 0.00005500  |
| H | 2.17290500  | 1.06898400  | 0.88435300  |
| H | 2.17297600  | 1.06873800  | -0.88475200 |
| H | 4.32572500  | 0.13916200  | -0.00005700 |
| H | 3.43382100  | -1.10902400 | 0.88835300  |
| H | 3.43381900  | -1.10935300 | -0.88800600 |

**R2/ωB97X-D**

|   |             |             |             |
|---|-------------|-------------|-------------|
| C | 1.18146400  | -0.96971600 | -0.07573400 |
| O | 1.17922200  | -2.19364300 | -0.15682000 |
| C | 2.48237800  | -0.22712600 | -0.03127100 |
| C | 2.58969900  | 1.13838500  | -0.31619900 |
| C | 3.63727000  | -0.95014700 | 0.28895700  |
| C | 3.83041500  | 1.76746500  | -0.27569900 |
| H | 1.71617600  | 1.71766300  | -0.59495200 |
| C | 4.87274200  | -0.31937600 | 0.34274100  |
| H | 3.54377000  | -2.01032700 | 0.49730100  |
| C | 4.97076400  | 1.04268600  | 0.06022200  |
| H | 3.90627800  | 2.82496700  | -0.50571600 |
| H | 5.76063700  | -0.88608100 | 0.60329200  |
| H | 5.93571400  | 1.53759600  | 0.10008700  |
| C | -0.08074700 | -0.19943900 | 0.00592400  |
| C | -1.26056500 | -0.82734200 | -0.11726300 |
| H | -0.02592300 | 0.86608600  | 0.19642900  |
| H | -1.22516900 | -1.90238300 | -0.28750300 |
| C | -2.59758400 | -0.23297200 | -0.03680100 |
| C | -3.71201400 | -1.07961600 | -0.11287400 |
| C | -2.81155200 | 1.14535500  | 0.11782900  |
| C | -5.00319300 | -0.56935300 | -0.02947600 |
| H | -3.55995200 | -2.14798100 | -0.23671200 |
| C | -4.10015300 | 1.65482900  | 0.19925800  |
| H | -1.96901200 | 1.82731100  | 0.16975100  |
| C | -5.20010700 | 0.79942400  | 0.12805200  |
| H | -5.85350900 | -1.24087800 | -0.08673400 |
| H | -4.25011900 | 2.72265200  | 0.31920400  |
| H | -6.20556500 | 1.20217900  | 0.19411500  |

**TS1/ωB97X-D**

|   |             |            |             |
|---|-------------|------------|-------------|
| C | -1.07957800 | 1.81485100 | -1.35630200 |
| C | -2.21618900 | 1.08807100 | -1.38955700 |
| C | -1.04853000 | 0.43813200 | 0.44411700  |

---

|   |             |             |             |
|---|-------------|-------------|-------------|
| N | -0.38793000 | 1.42335000  | -0.22173300 |
| H | -0.73364700 | 2.58187000  | -2.02979500 |
| H | -3.02258700 | 1.11156000  | -2.10215900 |
| N | -2.19861000 | 0.26999300  | -0.27071400 |
| C | 0.84980300  | 2.11770200  | 0.21740600  |
| C | 0.50515800  | 3.59736200  | 0.44377600  |
| C | 1.36501400  | 1.52158100  | 1.52538500  |
| C | 1.91389000  | 1.97701400  | -0.87796800 |
| H | 0.14102100  | 4.07670300  | -0.46892100 |
| H | -0.26322400 | 3.69479900  | 1.21615200  |
| H | 1.39817300  | 4.13612500  | 0.77213700  |
| H | 1.69845400  | 0.49306600  | 1.39191300  |
| H | 2.21510500  | 2.12228000  | 1.86218300  |
| H | 0.59374500  | 1.54479600  | 2.29875800  |
| H | 2.84527900  | 2.44494700  | -0.54691500 |
| H | 2.11063300  | 0.92402400  | -1.08503800 |
| H | 1.60770100  | 2.46451500  | -1.80774500 |
| C | -3.31453300 | -0.63945800 | 0.10820300  |
| C | -3.05647400 | -2.04544200 | -0.44602300 |
| C | -3.43341300 | -0.67391000 | 1.63398800  |
| C | -4.62534700 | -0.09633600 | -0.47591700 |
| H | -2.87822100 | -2.00737300 | -1.52495000 |
| H | -2.19530800 | -2.50685600 | 0.04091300  |
| H | -3.92985700 | -2.67849600 | -0.26485600 |
| H | -3.59911000 | 0.33125100  | 2.03163800  |
| H | -4.28467200 | -1.30198200 | 1.91172500  |
| H | -2.53568200 | -1.08863100 | 2.09099400  |
| H | -5.45594700 | -0.68342700 | -0.07708900 |
| H | -4.78160900 | 0.94993300  | -0.19854500 |
| H | -4.66169300 | -0.18433700 | -1.56515900 |
| C | 0.04600400  | -1.45141200 | 0.81178400  |
| C | -0.02178700 | -1.65190600 | 2.10919500  |
| C | 0.46021900  | -1.83334800 | -0.41720100 |
| H | 0.30876500  | -2.60926000 | 2.50428100  |
| H | -0.37631200 | -0.89636300 | 2.79639500  |
| H | -0.25759400 | -2.13444800 | -1.17239700 |
| C | 1.82609800  | -1.70915200 | -0.87963700 |
| O | 2.20452800  | -1.98251000 | -2.01133000 |
| O | 2.68236000  | -1.26419400 | 0.07151500  |
| C | 4.04209400  | -1.07047900 | -0.33009400 |
| C | 4.74226100  | -0.33131900 | 0.78993600  |
| H | 4.06895200  | -0.50085500 | -1.26377300 |
| H | 4.50438100  | -2.04429700 | -0.52121300 |
| H | 5.79494400  | -0.18232700 | 0.53618200  |
| H | 4.28213300  | 0.64752400  | 0.95010600  |
| H | 4.68873300  | -0.89622000 | 1.72428900  |

M1/ωB97X-D

---

|   |              |              |              |
|---|--------------|--------------|--------------|
| C | 2. 93915800  | 1. 25085400  | 0. 06597500  |
| C | 3. 25914300  | -0. 05725400 | 0. 12353000  |
| C | 1. 06448800  | 0. 08958800  | -0. 14653500 |
| N | 1. 57293400  | 1. 34216700  | -0. 10686700 |
| H | 3. 58231800  | 2. 10851700  | 0. 13196800  |
| H | 4. 22391100  | -0. 51308500 | 0. 24378800  |
| N | 2. 09023700  | -0. 77993500 | -0. 00177900 |
| C | 0. 85138200  | 2. 67072800  | -0. 08861500 |
| C | 1. 82548900  | 3. 74923600  | -0. 58195500 |
| C | -0. 37095100 | 2. 67037700  | -1. 01009700 |
| C | 0. 44085700  | 2. 95552000  | 1. 35913000  |
| H | 2. 63596500  | 3. 94078300  | 0. 12495700  |
| H | 2. 24808300  | 3. 49445400  | -1. 55763200 |
| H | 1. 27072500  | 4. 68364000  | -0. 68608200 |
| H | -1. 16127300 | 2. 02147300  | -0. 63832200 |
| H | -0. 75303000 | 3. 69366100  | -1. 04811900 |
| H | -0. 10387700 | 2. 36279200  | -2. 02361800 |
| H | -0. 01448700 | 3. 94797100  | 1. 41505800  |
| H | -0. 28693700 | 2. 21564900  | 1. 69797900  |
| H | 1. 31088900  | 2. 93769000  | 2. 02191400  |
| C | 2. 05153300  | -2. 29029100 | -0. 00609100 |
| C | 0. 95243500  | -2. 79254900 | 0. 93359300  |
| C | 1. 83492300  | -2. 77732000 | -1. 44130000 |
| C | 3. 39875200  | -2. 81418200 | 0. 50651800  |
| H | 1. 09401800  | -2. 39084800 | 1. 94062100  |
| H | -0. 04297800 | -2. 51962900 | 0. 58857400  |
| H | 1. 01877600  | -3. 88226800 | 0. 98417200  |
| H | 2. 59327300  | -2. 35839300 | -2. 10903800 |
| H | 1. 92152700  | -3. 86698900 | -1. 46420200 |
| H | 0. 84550600  | -2. 49447000 | -1. 80198900 |
| H | 3. 32321500  | -3. 90037500 | 0. 58513000  |
| H | 4. 22046400  | -2. 59647400 | -0. 18042100 |
| H | 3. 63695000  | -2. 42207400 | 1. 49896300  |
| C | -0. 37709900 | -0. 25814900 | -0. 31606300 |
| C | -0. 74657000 | -0. 54571100 | -1. 59235100 |
| C | -1. 11815700 | -0. 17481000 | 0. 90554000  |
| H | -1. 77423600 | -0. 77446000 | -1. 83665100 |
| H | -0. 02408700 | -0. 48215600 | -2. 39842200 |
| H | -0. 55672700 | -0. 06271100 | 1. 82603700  |
| C | -2. 51370900 | -0. 27402800 | 1. 08290400  |
| O | -3. 12345000 | -0. 22839300 | 2. 16174100  |
| O | -3. 22103800 | -0. 42026000 | -0. 09228700 |
| C | -4. 63469500 | -0. 50054900 | 0. 03369800  |
| C | -5. 20718800 | -0. 69217400 | -1. 35683100 |
| H | -5. 02378500 | 0. 41352400  | 0. 49636900  |
| H | -4. 90613800 | -1. 33407300 | 0. 69058000  |
| H | -6. 29735700 | -0. 76283100 | -1. 30803800 |
| H | -4. 94339600 | 0. 14856300  | -2. 00461500 |



---

|                    |             |             |             |
|--------------------|-------------|-------------|-------------|
| H                  | -4.82234800 | -1.61000600 | -1.81037400 |
| <b>TS2/ωB97X-D</b> |             |             |             |
| C                  | 3.05258500  | -3.23717300 | -0.94324600 |
| C                  | 3.84615600  | -2.56902200 | -0.08384500 |
| C                  | 1.87747200  | -1.54277100 | -0.11987600 |
| N                  | 1.83349400  | -2.59990700 | -0.96562600 |
| H                  | 3.27203300  | -4.10996900 | -1.52856800 |
| H                  | 4.86458000  | -2.77207900 | 0.18694100  |
| N                  | 3.11900900  | -1.52116200 | 0.43523100  |
| C                  | 0.69464600  | -3.04993300 | -1.84744600 |
| C                  | 1.16649400  | -4.21906700 | -2.71819300 |
| C                  | -0.46608500 | -3.52592500 | -0.97116900 |
| C                  | 0.31578700  | -1.88308600 | -2.75473800 |
| H                  | 2.01100100  | -3.94672600 | -3.35726400 |
| H                  | 1.42202500  | -5.10373200 | -2.12839400 |
| H                  | 0.33563700  | -4.49178200 | -3.37184900 |
| H                  | -0.93281900 | -2.69911500 | -0.44183600 |
| H                  | -1.22663000 | -3.97613100 | -1.61277100 |
| H                  | -0.11712100 | -4.28089200 | -0.26025200 |
| H                  | -0.48526700 | -2.19546400 | -3.42686100 |
| H                  | -0.06061100 | -1.04690300 | -2.17458000 |
| H                  | 1.17894100  | -1.56882700 | -3.34913600 |
| C                  | 3.74560000  | -0.52932100 | 1.39343900  |
| C                  | 4.17770600  | 0.70326500  | 0.59386700  |
| C                  | 2.79342800  | -0.17641800 | 2.53856400  |
| C                  | 4.99123600  | -1.17718700 | 2.01722200  |
| H                  | 4.85250000  | 0.41161000  | -0.21603400 |
| H                  | 3.33031200  | 1.24425000  | 0.17516700  |
| H                  | 4.71807800  | 1.38288300  | 1.25868300  |
| H                  | 2.44236700  | -1.08135500 | 3.04193800  |
| H                  | 3.35077500  | 0.42524200  | 3.26081000  |
| H                  | 1.93060500  | 0.40047500  | 2.22056700  |
| H                  | 5.36956200  | -0.49505200 | 2.78063400  |
| H                  | 4.75721100  | -2.12893300 | 2.50169900  |
| H                  | 5.79767000  | -1.32301800 | 1.29494600  |
| C                  | 0.77982100  | -0.58217300 | 0.22240900  |
| C                  | -0.07805900 | -0.97237600 | 1.18603800  |
| C                  | 0.81868300  | 0.73833100  | -0.41161900 |
| H                  | -0.81452500 | -0.28825500 | 1.57801000  |
| H                  | -0.00365600 | -1.95680600 | 1.63584000  |
| H                  | 1.48854300  | 0.80561900  | -1.26604000 |
| C                  | 0.91980400  | 1.94385000  | 0.39370500  |
| O                  | 1.59213100  | 2.92551800  | 0.09703100  |
| O                  | 0.15220000  | 1.92053000  | 1.51189900  |
| C                  | 0.17693800  | 3.09471700  | 2.33252700  |
| C                  | 1.36188100  | 3.09448100  | 3.28070200  |
| H                  | -0.76702500 | 3.06770300  | 2.88117700  |

---

|   |             |             |             |
|---|-------------|-------------|-------------|
| H | 0.18753600  | 3.97661100  | 1.68843400  |
| H | 1.33200600  | 3.98666800  | 3.91296000  |
| H | 1.34345700  | 2.21325300  | 3.92779000  |
| H | 2.29877800  | 3.09851100  | 2.71862800  |
| C | -2.72831800 | -0.57120400 | -0.57994400 |
| O | -2.55715900 | -1.26528900 | -1.60607000 |
| C | -3.66590400 | -1.11627800 | 0.48085100  |
| C | -4.42291800 | -2.24752600 | 0.16163200  |
| C | -3.79890800 | -0.56811800 | 1.76181100  |
| C | -5.30025100 | -2.80797000 | 1.08355800  |
| H | -4.30013500 | -2.67614800 | -0.82713500 |
| C | -4.67580700 | -1.12569200 | 2.68818600  |
| H | -3.20868700 | 0.29432900  | 2.05387600  |
| C | -5.43270000 | -2.24574900 | 2.35166900  |
| H | -5.88166600 | -3.68477900 | 0.81424900  |
| H | -4.76569600 | -0.68520800 | 3.67643800  |
| H | -6.11780600 | -2.67846900 | 3.07414300  |
| C | -2.14447300 | 0.70929800  | -0.38063300 |
| C | -1.16327200 | 1.19153900  | -1.25033100 |
| H | -2.45050500 | 1.30762100  | 0.46819600  |
| H | -0.99467400 | 0.56140300  | -2.11805400 |
| C | -0.98869600 | 2.63477000  | -1.55016100 |
| C | -0.29084600 | 3.01205900  | -2.70346800 |
| C | -1.51912100 | 3.64517600  | -0.73957800 |
| C | -0.12462700 | 4.35109900  | -3.03850900 |
| H | 0.12759900  | 2.23905500  | -3.34321900 |
| C | -1.35010600 | 4.98634100  | -1.06797000 |
| H | -2.07182200 | 3.38453400  | 0.15682900  |
| C | -0.65200200 | 5.34642000  | -2.21839000 |
| H | 0.41631400  | 4.61860200  | -3.94113100 |
| H | -1.76822000 | 5.75328800  | -0.42298100 |
| H | -0.52241700 | 6.39324700  | -2.47434400 |
